# Supplementary material for: Nickel-containing 4,4′-biphenol mixed-mode stationary phase for the separation of polyaromatic compounds, benzene derivatives and nucleotides
Source: Royal Society of Chemistry journal article supplement (doi:10.1039/d5ra08544f), 2026-01-01
Supplement: d5ra08544f1.xlsx [file d5ra08544f1.xlsx]

## Sheet: Sheet1
5	2408
5.05	2523
5.1	2570
5.15	2548		EDX raw data
5.2	2469
5.25	2351
5.3	2402
5.35	2559
5.4	2509
5.45	2646
5.5	3035
5.55	3325
5.6	3789
5.65	4190
5.7	4277
5.75	3250
5.8	2435
5.85	2301
5.9	2143
5.95	2099
6	2049
6.05	2034
6.1	2007
6.15	1970
6.2	2026
6.25	2003
6.3	1929
6.35	1969
6.4	1885
6.45	1954
6.5	1936
6.55	1819
6.6	1893
6.65	1796
6.7	1902
6.75	1874
6.8	1922
6.85	1787
6.9	1813
6.95	1771
7	1813
7.05	1839
7.1	1778
7.15	1710
7.2	1843
7.25	1702
7.3	1731
7.35	1755
7.4	1621
7.45	1673
7.5	1675
7.55	1709
7.6	1681
7.65	1661
7.7	1654
7.75	1650
7.8	1771
7.85	1686
7.9	1629
7.95	1670
8	1589
8.05	1659
8.1	1610
8.15	1625
8.2	1549
8.25	1600
8.3	1621
8.35	1602
8.4	1615
8.45	1651
8.5	1547
8.55	1619
8.6	1662
8.65	1542
8.7	1575
8.75	1582
8.8	1536
8.85	1543
8.9	1528
8.95	1592
9	1477
9.05	1486
9.1	1556
9.15	1495
9.2	1536
9.25	1554
9.3	1481
9.35	1419
9.4	1494
9.45	1456
9.5	1495
9.55	1482
9.6	1388
9.65	1524
9.7	1497
9.75	1359
9.8	1486
9.85	1455
9.9	1500
9.95	1408
10	1463
10.05	1464
10.1	1455
10.15	1481
10.2	1464
10.25	1482
10.3	1477
10.35	1413
10.4	1444
10.45	1447
10.5	1440
10.55	1410
10.6	1345
10.65	1439
10.7	1476
10.75	1440
10.8	1431
10.85	1440
10.9	1338
10.95	1429
11	1448
11.05	1384
11.1	1365
11.15	1348
11.2	1438
11.25	1464
11.3	1487
11.35	1557
11.4	1422
11.45	1412
11.5	1433
11.55	1370
11.6	1563
11.65	1599
11.7	1636
11.75	1467
11.8	1534
11.85	1459
11.9	1392
11.95	1408
12	1313
12.05	1384
12.1	1377
12.15	1450
12.2	1386
12.25	1309
12.3	1362
12.35	1351
12.4	1314
12.45	1295
12.5	1349
12.55	1382
12.6	1334
12.65	1349
12.7	1289
12.75	1312
12.8	1309
12.85	1329
12.9	1286
12.95	1364
13	1381
13.05	1298
13.1	1292
13.15	1377
13.2	1326
13.25	1348
13.3	1255
13.35	1331
13.4	1300
13.45	1312
13.5	1322
13.55	1271
13.6	1343
13.65	1351
13.7	1299
13.75	1274
13.8	1269
13.85	1332
13.9	1358
13.95	1286
14	1391
14.05	1372
14.1	1356
14.15	1322
14.2	1390
14.25	1340
14.3	1416
14.35	1247
14.4	1293
14.45	1304
14.5	1333
14.55	1255
14.6	1345
14.65	1209
14.7	1254
14.75	1331
14.8	1231
14.85	1231
14.9	1220
14.95	1222
15	1344
15.05	1244
15.1	1276
15.15	1184
15.2	1212
15.25	1353
15.3	1279
15.35	1246
15.4	1213
15.45	1232
15.5	1257
15.55	1221
15.6	1321
15.65	1247
15.7	1237
15.75	1257
15.8	1238
15.85	1171
15.9	1265
15.95	1232
16	1204
16.05	1261
16.1	1249
16.15	1214
16.2	1237
16.25	1297
16.3	1201
16.35	1286
16.4	1265
16.45	1219
16.5	1154
16.55	1218
16.6	1286
16.65	1174
16.7	1213
16.75	1246
16.8	1179
16.85	1191
16.9	1196
16.95	1200
17	1295
17.05	1252
17.1	1280
17.15	1262
17.2	1301
17.25	1180
17.3	1172
17.35	1214
17.4	1234
17.45	1230
17.5	1206
17.55	1247
17.6	1260
17.65	1204
17.7	1193
17.75	1214
17.8	1201
17.85	1222
17.9	1161
17.95	1213
18	1201
18.05	1159
18.1	1256
18.15	1213
18.2	1222
18.25	1127
18.3	1200
18.35	1219
18.4	1181
18.45	1142
18.5	1213
18.55	1263
18.6	1223
18.65	1221
18.7	1269
18.75	1310
18.8	1447
18.85	1770
18.9	2182
18.95	2522
19	2563
19.05	1973
19.1	1511
19.15	1420
19.2	1274
19.25	1262
19.3	1174
19.35	1228
19.4	1204
19.45	1168
19.5	1257
19.55	1155
19.6	1172
19.65	1195
19.7	1210
19.75	1219
19.8	1207
19.85	1129
19.9	1175
19.95	1203
20	1171
20.05	1197
20.1	1255
20.15	1270
20.2	1201
20.25	1345
20.3	1373
20.35	1305
20.4	1270
20.45	1293
20.5	1282
20.55	1343
20.6	1460
20.65	1509
20.7	1600
20.75	1706
20.8	1685
20.85	1742
20.9	2132
20.95	2565
21	3371
21.05	3773
21.1	3387
21.15	2561
21.2	1809
21.25	1473
21.3	1323
21.35	1262
21.4	1215
21.45	1231
21.5	1245
21.55	1214
21.6	1195
21.65	1206
21.7	1235
21.75	1269
21.8	1209
21.85	1230
21.9	1180
21.95	1175
22	1174
22.05	1186
22.1	1185
22.15	1264
22.2	1303
22.25	1261
22.3	1238
22.35	1318
22.4	1398
22.45	1454
22.5	1577
22.55	1619
22.6	1537
22.65	1511
22.7	1818
22.75	2237
22.8	2604
22.85	3220
22.9	3607
22.95	3777
23	3480
23.05	2710
23.1	2129
23.15	1685
23.2	1477
23.25	1309
23.3	1324
23.35	1324
23.4	1231
23.45	1276
23.5	1312
23.55	1196
23.6	1178
23.65	1231
23.7	1091
23.75	1175
23.8	1187
23.85	1188
23.9	1160
23.95	1118
24	1210
24.05	1201
24.1	1198
24.15	1084
24.2	1181
24.25	1231
24.3	1170
24.35	1195
24.4	1210
24.45	1230
24.5	1171
24.55	1127
24.6	1152
24.65	1143
24.7	1160
24.75	1142
24.8	1136
24.85	1158
24.9	1188
24.95	1209
25	1161
25.05	1200
25.1	1191
25.15	1132
25.2	1206
25.25	1213
25.3	1210
25.35	1197
25.4	1263
25.45	1266
25.5	1318
25.55	1243
25.6	1331
25.65	1369
25.7	1426
25.75	1288
25.8	1329
25.85	1168
25.9	1154
25.95	1192
26	1204
26.05	1131
26.1	1135
26.15	1188
26.2	1197
26.25	1249
26.3	1223
26.35	1244
26.4	1254
26.45	1539
26.5	1901
26.55	1707
26.6	1303
26.65	1176
26.7	1209
26.75	1125
26.8	1107
26.85	1108
26.9	1106
26.95	1191
27	1131
27.05	1111
27.1	1129
27.15	1144
27.2	1172
27.25	1241
27.3	1180
27.35	1253
27.4	1189
27.45	1163
27.5	1115
27.55	1205
27.6	1133
27.65	1100
27.7	1180
27.75	1189
27.8	1162
27.85	1202
27.9	1237
27.95	1384
28	1421
28.05	1729
28.1	2032
28.15	2468
28.2	2699
28.25	2568
28.3	2309
28.35	2049
28.4	2005
28.45	2043
28.5	2162
28.55	2083
28.6	1947
28.65	1805
28.7	1767
28.75	1719
28.8	1552
28.85	1333
28.9	1340
28.95	1265
29	1188
29.05	1250
29.1	1429
29.15	1568
29.2	1903
29.25	2560
29.3	3972
29.35	6129
29.4	10966
29.45	7956
29.5	5123
29.55	2412
29.6	1479
29.65	1275
29.7	1266
29.75	1220
29.8	1170
29.85	1214
29.9	1209
29.95	1148
30	1202
30.05	1194
30.1	1221
30.15	1236
30.2	1305
30.25	1369
30.3	1378
30.35	1331
30.4	1269
30.45	1180
30.5	1136
30.55	1071
30.6	1051
30.65	1085
30.7	1051
30.75	1033
30.8	1050
30.85	1119
30.9	1076
30.95	1115
31	1081
31.05	1136
31.1	1181
31.15	1178
31.2	1228
31.25	1267
31.3	1292
31.35	1301
31.4	1356
31.45	1204
31.5	1210
31.55	1174
31.6	1317
31.65	1420
31.7	1907
31.75	2168
31.8	2211
31.85	1996
31.9	2315
31.95	1784
32	1654
32.05	1221
32.1	1172
32.15	1099
32.2	1028
32.25	1022
32.3	1013
32.35	1006
32.4	970
32.45	1023
32.5	1007
32.55	1012
32.6	1102
32.65	1080
32.7	1045
32.75	1101
32.8	1126
32.85	1086
32.9	1115
32.95	1239
33	1391
33.05	1586
33.1	1916
33.15	2014
33.2	2033
33.25	1903
33.3	1793
33.35	1640
33.4	1526
33.45	1440
33.5	1355
33.55	1326
33.6	1300
33.65	1358
33.7	1291
33.75	1140
33.8	1083
33.85	1106
33.9	1043
33.95	1076
34	998
34.05	1017
34.1	971
34.15	1054
34.2	945
34.25	950
34.3	1038
34.35	1086
34.4	1161
34.45	1247
34.5	1315
34.55	1298
34.6	1247
34.65	1138
34.7	1119
34.75	1013
34.8	1068
34.85	1117
34.9	1060
34.95	1088
35	1015
35.05	1057
35.1	1064
35.15	1028
35.2	1093
35.25	1047
35.3	1220
35.35	1305
35.4	1443
35.45	1299
35.5	1234
35.55	1072
35.6	1011
35.65	964
35.7	960
35.75	1016
35.8	1016
35.85	1049
35.9	1043
35.95	1059
36	1122
36.05	1062
36.1	1039
36.15	1046
36.2	1010
36.25	920
36.3	1013
36.35	973
36.4	982
36.45	935
36.5	950
36.55	912
36.6	944
36.65	926
36.7	927
36.75	939
36.8	887
36.85	929
36.9	917
36.95	976
37	1007
37.05	967
37.1	937
37.15	981
37.2	903
37.25	951
37.3	890
37.35	954
37.4	909
37.45	925
37.5	895
37.55	833
37.6	838
37.65	929
37.7	877
37.75	882
37.8	895
37.85	870
37.9	925
37.95	874
38	908
38.05	838
38.1	910
38.15	960
38.2	977
38.25	1004
38.3	1056
38.35	1047
38.4	1099
38.45	1067
38.5	961
38.55	991
38.6	1019
38.65	972
38.7	993
38.75	1072
38.8	1115
38.85	1303
38.9	1469
38.95	2059
39	2371
39.05	1575
39.1	1536
39.15	1175
39.2	1111
39.25	1179
39.3	1146
39.35	1110
39.4	1064
39.45	1064
39.5	999
39.55	883
39.6	899
39.65	889
39.7	857
39.75	873
39.8	882
39.85	887
39.9	865
39.95	969
40	960
40.05	951
40.1	913
40.15	909
40.2	894
40.25	927
40.3	869
40.35	909
40.4	939
40.45	970
40.5	995
40.55	946
40.6	924
40.65	901
40.7	844
40.75	867
40.8	859
40.85	855
40.9	818
40.95	896
41	889
41.05	907
41.1	917
41.15	895
41.2	878
41.25	821
41.3	883
41.35	821
41.4	905
41.45	824
41.5	910
41.55	821
41.6	856
41.65	787
41.7	836
41.75	890
41.8	824
41.85	834
41.9	866
41.95	813
42	812
42.05	905
42.1	820
42.15	755
42.2	823
42.25	818
42.3	826
42.35	779
42.4	953
42.45	1072
42.5	1228
42.55	1456
42.6	1193
42.65	1171
42.7	981
42.75	890
42.8	772
42.85	846
42.9	870
42.95	925
43	936
43.05	985
43.1	1163
43.15	1053
43.2	1073
43.25	1068
43.3	1092
43.35	1001
43.4	913
43.45	953
43.5	899
43.55	896
43.6	874
43.65	886
43.7	895
43.75	836
43.8	839
43.85	875
43.9	836
43.95	806
44	773
44.05	784
44.1	766
44.15	804
44.2	800
44.25	755
44.3	761
44.35	754
44.4	696
44.45	765
44.5	756
44.55	783
44.6	740
44.65	720
44.7	718
44.75	772
44.8	704
44.85	773
44.9	774
44.95	762
45	778
45.05	778
45.1	783
45.15	778
45.2	801
45.25	798
45.3	782
45.35	894
45.4	976
45.45	1037
45.5	945
45.55	924
45.6	895
45.65	849
45.7	760
45.75	808
45.8	866
45.85	964
45.9	960
45.95	1101
46	1263
46.05	1386
46.1	1351
46.15	1340
46.2	1234
46.25	1148
46.3	971
46.35	995
46.4	848
46.45	855
46.5	884
46.55	895
46.6	1109
46.65	1101
46.7	916
46.75	958
46.8	855
46.85	760
46.9	746
46.95	769
47	748
47.05	727
47.1	805
47.15	787
47.2	821
47.25	859
47.3	825
47.35	896
47.4	896
47.45	876
47.5	903
47.55	829
47.6	800
47.65	852
47.7	825
47.75	884
47.8	999
47.85	1293
47.9	1654
47.95	1772
48	1424
48.05	1303
48.1	1125
48.15	889
48.2	799
48.25	884
48.3	915
48.35	1187
48.4	1274
48.45	1033
48.5	1019
48.55	857
48.6	684
48.65	728
48.7	739
48.75	720
48.8	680
48.85	665
48.9	682
48.95	662
49	731
49.05	680
49.1	729
49.15	705
49.2	735
49.25	717
49.3	712
49.35	709
49.4	723
49.45	680
49.5	763
49.55	737
49.6	702
49.65	748
49.7	663
49.75	687
49.8	732
49.85	788
49.9	826
49.95	798
50	757
50.05	757
50.1	751
50.15	696
50.2	714
50.25	737
50.3	708
50.35	684
50.4	700
50.45	714
50.5	672
50.55	753
50.6	731
50.65	686
50.7	748
50.75	738
50.8	723
50.85	762
50.9	737
50.95	709
51	765
51.05	784
51.1	726
51.15	783
51.2	771
51.25	708
51.3	749
51.35	756
51.4	714
51.45	697
51.5	718
51.55	703
51.6	717
51.65	702
51.7	702
51.75	732
51.8	726
51.85	743
51.9	723
51.95	729
52	699
52.05	765
52.1	734
52.15	718
52.2	746
52.25	692
52.3	702
52.35	642
52.4	708
52.45	670
52.5	718
52.55	661
52.6	643
52.65	678
52.7	688
52.75	633
52.8	758
52.85	744
52.9	746
52.95	669
53	667
53.05	684
53.1	709
53.15	693
53.2	692
53.25	731
53.3	711
53.35	717
53.4	705
53.45	709
53.5	751
53.55	684
53.6	737
53.65	721
53.7	671
53.75	692
53.8	687
53.85	661
53.9	758
53.95	735
54	730
54.05	691
54.1	633
54.15	686
54.2	658
54.25	703
54.3	695
54.35	644
54.4	639
54.45	635
54.5	617
54.55	652
54.6	639
54.65	688
54.7	688
54.75	661
54.8	691
54.85	665
54.9	680
54.95	706
55	714
55.05	714
55.1	701
55.15	738
55.2	699
55.25	651
55.3	743
55.35	679
55.4	677
55.45	685
55.5	730
55.55	794
55.6	942
55.65	912
55.7	751
55.75	806
55.8	751
55.85	701
55.9	662
55.95	630
56	652
56.05	653
56.1	660
56.15	650
56.2	688
56.25	694
56.3	725
56.35	762
56.4	773
56.45	881
56.5	872
56.55	773
56.6	772
56.65	762
56.7	762
56.75	703
56.8	758
56.85	710
56.9	694
56.95	729
57	652
57.05	694
57.1	678
57.15	727
57.2	678
57.25	691
57.3	701
57.35	702
57.4	685
57.45	636
57.5	649
57.55	622
57.6	599
57.65	606
57.7	640
57.75	650
57.8	659
57.85	689
57.9	660
57.95	619
58	594
58.05	633
58.1	658
58.15	620
58.2	639
58.25	636
58.3	635
58.35	676
58.4	613
58.45	633
58.5	667
58.55	711
58.6	701
58.65	661
58.7	636
58.75	616
58.8	636
58.85	649
58.9	643
58.95	696
59	666
59.05	762
59.1	725
59.15	774
59.2	660
59.25	735
59.3	677
59.35	652
59.4	686
59.45	652
59.5	699
59.55	699
59.6	639
59.65	695
59.7	682
59.75	662
59.8	693
59.85	695
59.9	721
59.95	703
60	687
60.05	711
60.1	649
60.15	611
60.2	679
60.25	618
60.3	671
60.35	658
60.4	694
60.45	706
60.5	640
60.55	671
60.6	697
60.65	658
60.7	694
60.75	667
60.8	705
60.85	644
60.9	691
60.95	712
61	645
61.05	702
61.1	709
61.15	680
61.2	663
61.25	648
61.3	639
61.35	617
61.4	627
61.45	609
61.5	695
61.55	777
61.6	797
61.65	686
61.7	689
61.75	708
61.8	659
61.85	679
61.9	625
61.95	661
62	620
62.05	637
62.1	632
62.15	667
62.2	675
62.25	705
62.3	711
62.35	814
62.4	704
62.45	650
62.5	745
62.55	689
62.6	597
62.65	628
62.7	637
62.75	579
62.8	563
62.85	554
62.9	608
62.95	651
63	597
63.05	609
63.1	613
63.15	631
63.2	603
63.25	594
63.3	656
63.35	623
63.4	670
63.45	766
63.5	989
63.55	806
63.6	765
63.65	779
63.7	803
63.75	631
63.8	618
63.85	640
63.9	623
63.95	573
64	547
64.05	618
64.1	633
64.15	605
64.2	606
64.25	575
64.3	598
64.35	550
64.4	576
64.45	593
64.5	606
64.55	596
64.6	611
64.65	628
64.7	605
64.75	553
64.8	656
64.85	563
64.9	613
64.95	648
65	576
65.05	591
65.1	573
65.15	603
65.2	594
65.25	583
65.3	588
65.35	596
65.4	610
65.45	615
65.5	596
65.55	605
65.6	585
65.65	615
65.7	592
65.75	601
65.8	574
65.85	583
65.9	602
65.95	609
66	599
66.05	630
66.1	564
66.15	591
66.2	589
66.25	651
66.3	607
66.35	550
66.4	616
66.45	559
66.5	615
66.55	599
66.6	688
66.65	726
66.7	602
66.75	568
66.8	618
66.85	597
66.9	626
66.95	529
67	553
67.05	580
67.1	582
67.15	588
67.2	566
67.25	567
67.3	561
67.35	570
67.4	570
67.45	584
67.5	585
67.55	553
67.6	587
67.65	580
67.7	577
67.75	506
67.8	570
67.85	636
67.9	567
67.95	544
68	577
68.05	556
68.1	536
68.15	548
68.2	568
68.25	545
68.3	575
68.35	537
68.4	556
68.45	600
68.5	584
68.55	582
68.6	627
68.65	739
68.7	735
68.75	670
68.8	632
68.85	633
68.9	605
68.95	591
69	544
69.05	613
69.1	558
69.15	598
69.2	572
69.25	556
69.3	563
69.35	564
69.4	518
69.45	573
69.5	572
69.55	539
69.6	588
69.65	537
69.7	525
69.75	556
69.8	600
69.85	562
69.9	575
69.95	563
70	567
70.05	580
70.1	601
70.15	553
70.2	568
70.25	575
70.3	535
70.35	576
70.4	575
70.45	634
70.5	576
70.55	565
70.6	563
70.65	594
70.7	544
70.75	584
70.8	570
70.85	557
70.9	588
70.95	546
71	565
71.05	596
71.1	544
71.15	546
71.2	535
71.25	544
71.3	532
71.35	565
71.4	511
71.45	550
71.5	531
71.55	556
71.6	544
71.65	507
71.7	541
71.75	554
71.8	527
71.85	558
71.9	550
71.95	545
72	555
72.05	525
72.1	501
72.15	550
72.2	514
72.25	542
72.3	545
72.35	556
72.4	574
72.45	624
72.5	607
72.55	599
72.6	566
72.65	555
72.7	551
72.75	558
72.8	577
72.85	547
72.9	528
72.95	503
73	564
73.05	555
73.1	599
73.15	572
73.2	583
73.25	555
73.3	565
73.35	537
73.4	535
73.45	566
73.5	516
73.55	542
73.6	563
73.65	544
73.7	594
73.75	571
73.8	574
73.85	553
73.9	613
73.95	575
74	556
74.05	522
74.1	581
74.15	514
74.2	504
74.25	582
74.3	522
74.35	564
74.4	527
74.45	566
74.5	556
74.55	545
74.6	564
74.65	531
74.7	488
74.75	536
74.8	535
74.85	558
74.9	553
74.95	539
75	549
75.05	542
75.1	559
75.15	548
75.2	542
75.25	518
75.3	561
75.35	523
75.4	587
75.45	532
75.5	565
75.55	557
75.6	537
75.65	498
75.7	549
75.75	511
75.8	508
75.85	545
75.9	499
75.95	542
76	548
76.05	507
76.1	515
76.15	587
76.2	565
76.25	565
76.3	497
76.35	508
76.4	541
76.45	540
76.5	504
76.55	510
76.6	533
76.65	536
76.7	549
76.75	513
76.8	546
76.85	527
76.9	496
76.95	532
77	588
77.05	565
77.1	597
77.15	554
77.2	518
77.25	550
77.3	587
77.35	607
77.4	587
77.45	538
77.5	598
77.55	615
77.6	580
77.65	542
77.7	576
77.75	632
77.8	627
77.85	609
77.9	583
77.95	544
78	585
78.05	563
78.1	541
78.15	531
78.2	515
78.25	514
78.3	561
78.35	556
78.4	520
78.45	490
78.5	553
78.55	542
78.6	512
78.65	561
78.7	510
78.75	521
78.8	499
78.85	518
78.9	523
78.95	551
79	513
79.05	516
79.1	489
79.15	539
79.2	472
79.25	522
79.3	524
79.35	518
79.4	522
79.45	535
79.5	536
79.55	528
79.6	477
79.65	513
79.7	497
79.75	498
79.8	497
79.85	544
79.9	550
79.95	530
80	544
80.05	532
80.1	485
80.15	462
80.2	533
80.25	525
80.3	503
80.35	535
80.4	554
80.45	533
80.5	523
80.55	490
80.6	537
80.65	493
80.7	523
80.75	545
80.8	468
80.85	490
80.9	523
80.95	558
81	499
81.05	486
81.1	524
81.15	530
81.2	507
81.25	559
81.3	527
81.35	590
81.4	597
81.45	582
81.5	492
81.55	544
81.6	563
81.65	511
81.7	561
81.75	501
81.8	589
81.85	510
81.9	522
81.95	524
82	557
82.05	510
82.1	506
82.15	506
82.2	501
82.25	528
82.3	570
82.35	598
82.4	679
82.45	563
82.5	572
82.55	590
82.6	557
82.65	565
82.7	551
82.75	533
82.8	510
82.85	514
82.9	489
82.95	481
83	539
83.05	525
83.1	481
83.15	519
83.2	527
83.25	531
83.3	521
83.35	547
83.4	504
83.45	541
83.5	506
83.55	533
83.6	511
83.65	536
83.7	503
83.75	506
83.8	540
83.85	516
83.9	508
83.95	529
84	568
84.05	532
84.1	493
84.15	542
84.2	555
84.25	515
84.3	515
84.35	564
84.4	525
84.45	549
84.5	514
84.55	493
84.6	546
84.65	495
84.7	471
84.75	548
84.8	513
84.85	505
84.9	499
84.95	472
85	519
85.05	476
85.1	485
85.15	536
85.2	535
85.25	482
85.3	506
85.35	498
85.4	489
85.45	510
85.5	546
85.55	489
85.6	539
85.65	518
85.7	535
85.75	528
85.8	531
85.85	480
85.9	488
85.95	473
86	512
86.05	460
86.1	542
86.15	473
86.2	469
86.25	502
86.3	505
86.35	498
86.4	551
86.45	542
86.5	548
86.55	501
86.6	505
86.65	506
86.7	487
86.75	496
86.8	540
86.85	531
86.9	549
86.95	508
87	492
87.05	519
87.1	494
87.15	516
87.2	530
87.25	515
87.3	556
87.35	518
87.4	468
87.45	494
87.5	513
87.55	541
87.6	541
87.65	477
87.7	478
87.75	502
87.8	553
87.85	538
87.9	532
87.95	498
88	494
88.05	479
88.1	478
88.15	561
88.2	561
88.25	501
88.3	508
88.35	540
88.4	539
88.45	528
88.5	515
88.55	519
88.6	533
88.65	547
88.7	550
88.75	525
88.8	563
88.85	536
88.9	541
88.95	555
89	513
89.05	514
89.1	494
89.15	533
89.2	489
89.25	520
89.3	511
89.35	532
89.4	504
89.45	470
89.5	507
89.55	519
89.6	516
89.65	511
89.7	490
89.75	469
89.8	523
89.85	540
89.9	477
89.95	495
90	470
90.05	501
90.1	532
90.15	507
90.2	486
90.25	495
90.3	504
90.35	493
90.4	547
90.45	505
90.5	459
90.55	524
90.6	499
90.65	516
90.7	511
90.75	515
90.8	530
90.85	485
90.9	539
90.95	520
91	490
91.05	504
91.1	496
91.15	473
91.2	515
91.25	541
91.3	495
91.35	520
91.4	463
91.45	485
91.5	507
91.55	471
91.6	458
91.65	520
91.7	510
91.75	510
91.8	508
91.85	496
91.9	475
91.95	494
92	501
92.05	456
92.1	507
92.15	496
92.2	470
92.25	511
92.3	494
92.35	495
92.4	498
92.45	464
92.5	496
92.55	495
92.6	506
92.65	454
92.7	497
92.75	472
92.8	506
92.85	522
92.9	522
92.95	538
93	523
93.05	513
93.1	477
93.15	530
93.2	508
93.25	539
93.3	536
93.35	542
93.4	524
93.45	514
93.5	473
93.55	504
93.6	463
93.65	480
93.7	489
93.75	492
93.8	524
93.85	567
93.9	592
93.95	640
94	525
94.05	554
94.1	490
94.15	545
94.2	504
94.25	511
94.3	507
94.35	470
94.4	493
94.45	475
94.5	496
94.55	529
94.6	493
94.65	504
94.7	499
94.75	478
94.8	497
94.85	521
94.9	487
94.95	450
95	470
95.05	516
95.1	510
95.15	495
95.2	498
95.25	444
95.3	458
95.35	482
95.4	487
95.45	460
95.5	463
95.55	529
95.6	554
95.65	533
95.7	502
95.75	514
95.8	446
95.85	480
95.9	497
95.95	524
96	496
96.05	487
96.1	485
96.15	531
96.2	468
96.25	497
96.3	486
96.35	470
96.4	490
96.45	441
96.5	462
96.55	504
96.6	478
96.65	521
96.7	485
96.75	466
96.8	516
96.85	505
96.9	476
96.95	482
97	528
97.05	486
97.1	490
97.15	490
97.2	504
97.25	496
97.3	499
97.35	493
97.4	487
97.45	499
97.5	484
97.55	540
97.6	489
97.65	530
97.7	505
97.75	516
97.8	516
97.85	497
97.9	520
97.95	468
98	482
98.05	539
98.1	506
98.15	493
98.2	469
98.25	468
98.3	493
98.35	473
98.4	495
98.45	488
98.5	468
98.55	521
98.6	489
98.65	479
98.7	471
98.75	437
98.8	487
98.85	480
98.9	470
98.95	549
99	556
99.05	532
99.1	605
99.15	506
99.2	461
99.25	469
99.3	545
99.35	515
99.4	518
99.45	551
99.5	505
99.55	490
99.6	481
99.65	461
99.7	498
99.75	463
99.8	441
99.85	451
99.9	470
99.95	481
100	499

## Sheet: Sheet2
	1965.85	0.8457
	618.593	0.06547
	383.186	1.53624
	298.394	2.76054
	212.551	1.6204
	165.733	0.69232
	137.285	0.41605			Pore size distribution
	116.218	0.24543
	101.185	0.15492
	89.8584	0.09176
	80.8467	0.0563
	73.4188	0.02786

## Sheet: Sheet3
	0.01	0
	0.011	0
	0.013	0
	0.015	0
	0.017	0
	0.02	0			Particle size distribution
	0.023	0
	0.026	0
	0.03	0
	0.035	0
	0.04	0
	0.046	0
	0.052	0
	0.06	0
	0.069	0
	0.079	0
	0.091	0
	0.105	0
	0.12	0
	0.138	0
	0.158	0
	0.182	0
	0.209	0
	0.24	0
	0.275	0
	0.316	0
	0.363	0
	0.417	0
	0.479	0
	0.55	0
	0.631	0.16
	0.724	0.5
	0.832	2.02
	0.955	3.06
	1.096	4.22
	1.259	5.44
	1.445	6.61
	1.66	7.58
	1.905	9.21
	2.188	9.42
	2.512	9.18
	2.884	7.57
	3.311	6.69
	3.802	5.65
	4.365	4.56
	4.685	3.53
	4.896	2.63
	5.032	1.95
	5.247	1.79
	5.468	1.68
	5.547	1.56
	5.674	1.45
	5.845	1.33
	6.145	1
	6.457	0.8
	6.869	0.1
	7.105	0.045
	7.547	0.017
	8.117	0
	12.547	0
	15.856	0
	21.0325	0
	33.85	0
	49.741	0
	69.183	0
	79.433	0
	91.201	0
	104.713	0
	120.226	0
	138.038	0
	158.489	0
	181.97	0
	208.93	0
	239.883	0
	275.423	0
	316.228	0
	363.078	0
	416.869	0
	478.63	0
	549.541	0
	630.957	0
	724.436	0
	831.764	0
	954.993	0
	1096.48	0
	1258.92	0
	1445.44	0
	1659.59	0
	1905.46	0
	2187.76	0
	2511.89	0
	2884.03	0
	3311.31	0
	3801.89	0
	4365.16	0
	5011.87	0
	5754.4	0
	6606.93	0
	7585.78	0
	8709.64	0
	10000
	--	--
	--	--
	--	--
	--	--
	--	--
	--	--
	--	--
	--	--
	--	--
	--	--
	--	--
	--	--
	--	--

## Sheet: Sheet4
	410.007	97.6862	92.546
	413.735	94.7325	94.6663
	417.462	95.6804	96.4693
	421.189	97.9695	95.0587
	424.916	97.5652	94.2737
	428.644	97.2107	94.7982				FTIR raw data
	432.371	96.3927	94.3733
	436.099	96.4856	93.3876
	439.826	95.1833	93.0094
	443.553	92.5144	92.4011
	447.281	89.0828	91.2757
	451.008	85.1476	90.5736
	454.735	85.3115	89.5283
	458.463	88.9926	88.6737
	462.19	93.1166	87.9684
	465.917	95.3629	87.1793
	469.645	95.9046	87.0371
	473.372	95.9454	88.0012
	477.099	95.4726	88.8938
	480.827	95.1474	89.4513
	484.554	94.6506	90.2511
	488.281	93.3992	91.1116
	492.009	92.1031	91.6083
	495.736	90.6521	91.8178
	499.463	88.0371	91.6923
	503.191	78.7741	91.5379
	506.918	60.6867	90.2903
	510.645	54.616	87.2799
	514.373	69.6524	86.1403
	518.1	80.1288	85.8539
	521.827	81.2059	85.6327
	525.555	79.8569	88.4185
	529.282	75.6316	88.5617
	533.009	74.6165	88.8295
	536.737	79.9436	90.6899
	540.464	87.5232	88.2515
	544.191	92.654	87.9236
	547.919	94.5612	93.7642
	551.646	94.7597	97.8132
	555.373	95.4261	97.7928
	559.101	97.0413	96.4894
	562.828	97.3863	95.4616
	566.555	94.2495	94.9923
	570.283	89.3243	94.8565
	574.01	91.2203	94.0503
	577.737	95.9919	93.1675
	581.465	96.3413	91.6381
	585.192	95.4613	88.5455
	588.919	96.3273	86.9229
	592.647	97.0681	87.651
	596.374	96.9634	87.0409
	600.101	96.788	85.2652
	603.829	97.1045	83.0139
	607.556	97.2406	82.0546
	611.283	96.9701	82.2327
	615.011	96.7926	82.1683
	618.738	96.7315	80.9597
	622.465	96.5705	79.2556
	626.193	96.6151	78.7729
	629.92	96.5224	82.1556
	633.647	96.0966	86.4193
	637.375	95.412	89.536
	641.102	93.8626	91.6701
	644.829	92.6433	91.3675
	648.557	92.7807	90.0649
	652.284	93.2851	88.9219
	656.011	93.4023	87.3728
	659.739	93.1051	88.961
	663.466	92.9438	94.4924
	667.193	91.9561	97.9141
	670.921	89.7387	97.3089
	674.648	86.3283	96.0366
	678.375	81.3758	95.1204
	682.103	73.9472	94.1835
	685.83	64.5899	91.6478
	689.558	59.281	88.1106
	693.285	65.1505	85.0024
	697.012	78.4607	81.1475
	700.74	88.8595	74.0464
	704.467	92.5792	62.9682
	708.194	92.4447	55.4462
	711.922	92.5573	65.3639
	715.649	94.069	83.9779
	719.376	94.5238	92.7319
	723.104	94.5611	94.4276
	726.831	95.225	96.1811
	730.558	96.0784	95.8413
	734.286	97.0564	93.8679
	738.013	97.8969	93.6307
	741.74	98.0426	94.9162
	745.468	97.8107	96.4153
	749.195	97.3917	98.2764
	752.922	96.8723	98.6995
	756.65	96.3923	98.2721
	760.377	96.167	96.8254
	764.104	95.6233	95.0481
	767.832	94.8803	94.5057
	771.559	93.8752	95.59
	775.286	92.6436	95.7479
	779.014	91.0425	95.0674
	782.741	89.0521	93.8094
	786.468	84.3691	92.5265
	790.196	68.3691	90.7218
	793.923	42.8801	88.8484
	797.65	40.9924	86.3018
	801.378	64.323	83.3833
	805.105	78.1746	79.7018
	808.832	77.83	72.9923
	812.56	73.7575	60.3353
	816.287	66.9022	47.6941
	820.014	54.7566	38.227
	823.742	37.8242	44.8227
	827.469	19.5943	54.899
	831.196	20.5628	44.005
	834.924	45.4955	22.2291
	838.651	68.9514	17.7966
	842.378	80.5887	34.6185
	846.106	85.0721	55.2851
	849.833	87.5752	75.1039
	853.56	89.5895	88.0794
	857.288	90.4048	93.7345
	861.015	91.3727	96.4737
	864.742	92.228	98.8473
	868.47	91.8523	99.4316
	872.197	90.6903	99.2038
	875.924	89.3778	99.1259
	879.652	88.0116	99.1611
	883.379	86.2967	98.7279
	887.106	84.1839	98.2019
	890.834	81.5688	97.6618
	894.561	78.4535	97.0779
	898.288	74.9492	96.2746
	902.016	71.3119	95.4456
	905.743	68.2027	94.7133
	909.47	66.0825	94.1875
	913.198	65.6807	93.8939
	916.925	67.7574	93.75
	920.652	71.1066	93.558
	924.38	73.4763	93.2695
	928.107	73.5713	92.7722
	931.835	71.934	91.7965
	935.562	70.5041	89.9983
	939.289	70.3441	85.1468
	943.016	71.0714	76.8105
	946.744	73.2724	74.2148
	950.471	76.8876	81.4541
	954.198	80.7481	90.3976
	957.926	84.0296	92.7081
	961.653	86.4458	88.0673
	965.38	87.89	83.6706
	969.108	89.1628	86.6631
	972.835	90.5041	90.318
	976.562	91.9067	89.6921
	980.29	92.9227	89.629
	984.017	93.4644	90.7778
	987.745	93.7112	91.04
	991.472	92.8844	90.1894
	995.199	89.4371	89.0381
	998.927	89.0973	87.3239
	1002.65	93.4909	84.1412
	1006.38	95.5106	78.1118
	1010.11	95.152	77.8824
	1013.84	94.1151	82.0957
	1017.56	92.5956	80.1347
	1021.29	91.5312	74.7317
	1025.02	92.1573	67.5978
	1028.75	94.3512	58.5952
	1032.47	95.8222	56.0533
	1036.2	95.9389	62.6273
	1039.93	95.6817	68.5954
	1043.65	95.3149	68.3085
	1047.38	94.4118	63.2252
	1051.11	92.532	55.9906
	1054.84	90.0091	44.9711
	1058.56	88.5574	32.0747
	1062.29	88.3285	31.662
	1066.02	87.8466	50.2877
	1069.75	85.6924	73.246
	1073.47	79.4593	88.7738
	1077.2	68.1713	95.2315
	1080.93	57.6643	96.9999
	1084.66	49.5989	97.6172
	1088.38	45.4153	97.8291
	1092.11	51.4393	97.4246
	1095.84	68.2437	96.7362
	1099.56	86.9943	96.117
	1103.29	96.1564	95.65
	1107.02	97.7648	94.9759
	1110.75	97.3944	94.2178
	1114.47	96.2348	93.4777
	1118.2	94.3669	92.8309
	1121.93	93.0691	92.0049
	1125.66	93.1111	90.5537
	1129.38	93.4192	88.2992
	1133.11	92.1465	86.4939
	1136.84	89.7376	86.4339
	1140.57	88.7582	86.5775
	1144.29	89.9451	84.9858
	1148.02	91.5976	80.7077
	1151.75	92.1837	76.6261
	1155.47	91.4845	78.5502
	1159.2	90.237	82.8766
	1162.93	88.4619	83.737
	1166.66	85.7488	82.3144
	1170.38	80.6054	80.7414
	1174.11	70.7025	79.5041
	1177.84	58.9768	77.6174
	1181.57	57.1441	74.0818
	1185.29	68.4289	68.0341
	1189.02	81.0801	57.7999
	1192.75	85.6852	50.9163
	1196.48	84.0263	64.2754
	1200.2	80.4128	82.4067
	1203.93	76.4704	84.1725
	1207.66	71.9942	78.2439
	1211.38	66.1367	72.772
	1215.11	58.1886	67.8248
	1218.84	48.0545	62.5224
	1222.57	35.4979	56.3462
	1226.29	20.5556	49.0895
	1230.02	6.38666	42.2337
	1233.75	0	36.8115
	1237.48	6.12312	32.5675
	1241.2	23.1254	31.1073
	1244.93	43.4504	36.8816
	1248.66	58.6265	50.7624
	1252.39	67.3613	66.078
	1256.11	72.7927	72.5118
	1259.84	74.2581	70.5144
	1263.57	67.3145	68.7798
	1267.29	53.2907	74.3047
	1271.02	48.5771	84.9683
	1274.75	61.5154	86.7823
	1278.48	77.6248	72.9059
	1282.2	85.8334	53.8851
	1285.93	88.7957	57.4075
	1289.66	90.7195	83.5971
	1293.39	91.7533	99.073
	1297.11	90.8406	98.8286
	1300.84	88.1416	95.3399
	1304.57	84.9101	92.1616
	1308.3	83.0786	88.3978
	1312.02	83.586	84.1959
	1315.75	85.9641	79.7299
	1319.48	88.7169	75.3118
	1323.2	91.1667	70.8921
	1326.93	93.2208	66.6913
	1330.66	94.6924	62.6078
	1334.39	96.2134	58.3361
	1338.11	97.621	53.3704
	1341.84	97.998	49.0547
	1345.57	97.298	45.746
	1349.3	96.094	41.2448
	1353.02	95.3916	41.6555
	1356.75	95.4069	53.9551
	1360.48	94.7795	64.9641
	1364.21	92.3287	68.2775
	1367.93	89.7107	71.167
	1371.66	90.6191	73.0895
	1375.39	94.3002	72.2668
	1379.12	96.942	70.5252
	1382.84	97.9188	68.6585
	1386.57	98.09	66.6956
	1390.3	97.8327	64.6209
	1394.02	96.9174	62.4669
	1397.75	94.4885	60.4776
	1401.48	90.8288	58.6362
	1405.21	89.4946	56.1981
	1408.93	91.5408	53.6161
	1412.66	92.9989	52.3767
	1416.39	91.4606	51.1167
	1420.12	85.7572	46.9638
	1423.84	73.5874	39.9475
	1427.57	59.9213	35.2876
	1431.3	59.9777	36.3401
	1435.03	74.0213	40.7389
	1438.75	84.5649	49.3897
	1442.48	86.7524	62.9248
	1446.21	86.1242	74.6954
	1449.93	86.3029	78.1608
	1453.66	87.5422	77.0727
	1457.39	88.6547	78.4297
	1461.12	88.5828	80.6516
	1464.84	88.4883	81.7953
	1468.57	89.4033	81.9435
	1472.3	90.1697	78.2306
	1476.03	89.1803	74.0114
	1479.75	86.6496	75.6382
	1483.48	83.7743	80.0241
	1487.21	80.0571	80.2742
	1490.94	70.4511	75.2619
	1494.66	49.4402	67.4165
	1498.39	30.8876	60.4072
	1502.12	42.5404	51.0292
	1505.84	72.4433	38.8346
	1509.57	89.3562	41.4471
	1513.3	93.9108	64.8884
	1517.03	95.9303	86.2154
	1520.75	97.1664	94.932
	1524.48	97.7056	97.8005
	1528.21	97.9873	98.5947
	1531.94	98.1651	97.8542
	1535.66	98.2157	96.1442
	1539.39	98.0403	94.0027
	1543.12	97.709	91.6401
	1546.85	97.4268	88.692
	1550.57	97.0666	85.1045
	1554.3	96.3823	81.1269
	1558.03	95.214	76.8779
	1561.75	93.1305	71.8673
	1565.48	89.7452	65.6355
	1569.21	85.8747	57.4258
	1572.94	85.3328	46.7435
	1576.66	88.3571	35.1573
	1580.39	90.5265	29.1948
	1584.12	90.8049	30.3142
	1587.85	90.4571	32.6123
	1591.57	89.3925	33.1179
	1595.3	86.3645	29.8736
	1599.03	80.14	22.8422
	1602.76	70.7341	13.4879
	1606.48	64.5671	4.51372
	1610.21	69.788	0
	1613.94	81.0419	2.18308
	1617.66	87.8085	10.3059
	1621.39	89.2974	19.7729
	1625.12	89.0077	28.3568
	1628.85	88.983	37.736
	1632.57	89.7781	46.8239
	1636.3	91.0212	54.0309
	1640.03	91.9245	60.8392
	1643.76	92.385	68.5896
	1647.48	92.4907	76.1498
	1651.21	92.3102	81.7817
	1654.94	92.0816	85.2181
	1658.67	91.8983	87.2224
	1662.39	91.5801	88.5804
	1666.12	91.0821	89.6581
	1669.85	90.3773	90.7692
	1673.57	89.3179	91.8702
	1677.3	87.9058	92.7909
	1681.03	86.1121	93.5001
	1684.76	83.5164	94.0651
	1688.48	79.928	94.4471
	1692.21	75.036	94.652
	1695.94	67.5804	94.4692
	1699.67	56.7211	93.8588
	1703.39	46.7599	93.2828
	1707.12	45.5049	93.2469
	1710.85	54.5847	94.1796
	1714.58	66.8955	95.4842
	1718.3	74.4512	96.328
	1722.03	75.1743	96.7615
	1725.76	70.9945	97.056
	1729.48	63.8069	97.4332
	1733.21	57.1297	97.7555
	1736.94	55.3329	97.9556
	1740.67	58.8462	98.0356
	1744.39	64.7723	97.9954
	1748.12	72.0037	97.8323
	1751.85	80.1263	97.6615
	1755.58	86.7163	97.5321
	1759.3	90.3243	97.4471
	1763.03	91.8452	97.4123
	1766.76	92.375	97.4707
	1770.49	92.7531	97.5181
	1774.21	93.2305	97.5564
	1777.94	93.5828	97.5958
	1781.67	93.8221	97.7169
	1785.39	94.2879	98.0136
	1789.12	94.759	98.3199
	1792.85	94.986	98.2064
	1796.58	95.1075	97.8949
	1800.3	95.07	97.8831
	1804.03	95.0312	98.1949
	1807.76	95.1135	98.3415
	1811.49	95.1701	98.39
	1815.21	95.1877	98.4252
	1818.94	95.099	98.4416
	1822.67	95.1008	98.4558
	1826.4	95.2449	98.478
	1830.12	95.4654	98.4405
	1833.85	95.5687	98.4912
	1837.58	95.4444	98.4387
	1841.3	95.335	98.3513
	1845.03	95.4451	98.3703
	1848.76	95.5432	98.441
	1852.49	95.4625	98.3013
	1856.21	95.2331	98.1678
	1859.94	95.1525	98.0814
	1863.67	95.2808	98.0411
	1867.4	95.3101	97.9032
	1871.12	95.1283	97.6082
	1874.85	95.1222	97.0798
	1878.58	95.4712	96.6596
	1882.31	95.9056	96.5373
	1886.03	95.8161	96.5657
	1889.76	95.7477	96.7594
	1893.49	95.5735	96.5556
	1897.21	95.3231	95.7949
	1900.94	95.6839	95.1192
	1904.67	95.9276	94.9367
	1908.4	95.7764	95.117
	1912.12	95.7536	95.5233
	1915.85	95.5614	96.0245
	1919.58	95.4602	96.2031
	1923.31	95.7178	95.907
	1927.03	95.718	95.774
	1930.76	95.887	96.2223
	1934.49	96.178	96.3638
	1938.22	95.8706	96.5142
	1941.94	95.8499	96.6548
	1945.67	96.3232	96.7873
	1949.4	96.9021	96.9839
	1953.12	96.3353	97.0238
	1956.85	95.86	97.0053
	1960.58	97.7182	97.0628
	1964.31	98.338	96.9737
	1968.03	97.0261	97.3239
	1971.76	97.496	97.7336
	1975.49	98.3589	98.2128
	1979.22	98.804	98.7867
	1982.94	98.3626	99.0456
	1986.67	97.2758	98.8562
	1990.4	97.2056	98.6809
	1994.13	98.1651	97.9795
	1997.85	97.6301	97.213
	2001.58	97.4693	96.5567
	2005.31	98.4985	97.096
	2009.04	97.9855	97.8324
	2012.76	96.0293	97.9936
	2016.49	96.2575	97.4378
	2020.22	97.9652	97.1824
	2023.94	98.0723	97.922
	2027.67	96.3924	98.2471
	2031.4	95.8374	98.0853
	2035.13	95.6568	98.6156
	2038.85	96.8524	98.1186
	2042.58	97.6714	98.1001
	2046.31	96.3494	98.171
	2050.04	95.677	98.0905
	2053.76	96.4839	97.8041
	2057.49	96.3004	97.3545
	2061.22	95.6679	96.6511
	2064.95	95.6055	95.9604
	2068.67	94.993	95.2868
	2072.4	94.7378	94.869
	2076.13	95.0137	94.2615
	2079.85	95.2331	93.6976
	2083.58	94.9051	93.3997
	2087.31	94.5123	93.2234
	2091.04	94.4377	93.0793
	2094.76	94.3251	92.9567
	2098.49	94.5852	92.87
	2102.22	94.7515	93.3108
	2105.95	94.6376	93.5931
	2109.67	94.594	93.9881
	2113.4	95.1075	94.4772
	2117.13	95.1161	94.8526
	2120.86	94.7368	94.6129
	2124.58	94.7833	94.2876
	2128.31	94.9957	94.1612
	2132.04	94.6064	93.9775
	2135.76	94.4376	94.1109
	2139.49	95.6748	94.7715
	2143.22	96.3097	94.8911
	2146.95	95.3295	95.1843
	2150.67	95.1081	95.7101
	2154.4	96.1027	96.5969
	2158.13	96.4158	97.4009
	2161.86	97.2672	98.3098
	2165.58	97.5767	99.1703
	2169.31	97.564	99.3334
	2173.04	98.2335	98.9445
	2176.77	98.1646	99.001
	2180.49	97.4695	98.5182
	2184.22	97.2319	98.3556
	2187.95	97.743	98.0653
	2191.67	98.4524	98.057
	2195.4	97.5142	98.3567
	2199.13	96.401	98.2744
	2202.86	96.0245	98.0281
	2206.58	95.0823	97.842
	2210.31	94.4887	97.7695
	2214.04	94.7846	97.8051
	2217.77	94.8309	97.5897
	2221.49	94.8072	97.71
	2225.22	94.7554	97.7032
	2228.95	94.3845	97.5752
	2232.68	94.5665	97.233
	2236.4	94.8335	97.1945
	2240.13	95.0454	97.286
	2243.86	95.2146	97.1782
	2247.58	94.7699	96.9462
	2251.31	94.0611	97.0384
	2255.04	93.9577	97.0361
	2258.77	94.1067	96.9628
	2262.49	94.314	96.8333
	2266.22	94.536	96.9165
	2269.95	94.2204	96.7502
	2273.68	93.7071	96.4352
	2277.4	93.8936	96.2637
	2281.13	94.0466	96.1365
	2284.86	93.7851	96.037
	2288.59	93.4278	95.8949
	2292.31	93.0875	95.6889
	2296.04	93.1495	95.7867
	2299.77	93.1205	95.8829
	2303.49	92.9143	95.7817
	2307.22	92.9772	95.5737
	2310.95	93.0528	95.4363
	2314.68	92.8124	95.3265
	2318.4	92.6584	95.3894
	2322.13	92.7626	95.5007
	2325.86	92.979	95.372
	2329.59	92.952	95.0626
	2333.31	92.941	95.1739
	2337.04	93.1438	95.5452
	2340.77	93.1553	95.6259
	2344.5	92.9767	95.5051
	2348.22	92.8099	95.4951
	2351.95	92.8487	95.4008
	2355.68	93.0931	95.2768
	2359.4	93.2242	95.2352
	2363.13	93.2686	95.3115
	2366.86	93.373	95.5943
	2370.59	93.4657	95.9727
	2374.31	93.4312	96.2859
	2378.04	93.3983	96.6096
	2381.77	93.2898	96.878
	2385.5	93.1148	96.9266
	2389.22	92.9999	96.7942
	2392.95	93.0216	96.8524
	2396.68	93.1197	96.9735
	2400.41	93.1354	97.0546
	2404.13	93.1741	97.254
	2407.86	93.0679	97.4618
	2411.59	92.8001	97.4755
	2415.31	92.7452	97.4059
	2419.04	92.7276	97.3315
	2422.77	92.7685	97.365
	2426.5	92.8199	97.2443
	2430.22	92.6274	96.9897
	2433.95	92.3661	96.7634
	2437.68	92.236	96.6303
	2441.41	92.3263	96.7012
	2445.13	92.3187	97.0338
	2448.86	92	97.3706
	2452.59	91.9868	97.6505
	2456.32	92.0602	97.8311
	2460.04	91.9884	97.866
	2463.77	91.9525	97.8697
	2467.5	92.0204	97.9779
	2471.22	92.0193	98.0915
	2474.95	91.9883	98.174
	2478.68	91.949	98.2316
	2482.41	91.7046	98.3421
	2486.13	91.657	98.6053
	2489.86	91.6321	98.794
	2493.59	91.3176	98.9377
	2497.32	91.0556	98.8305
	2501.04	91.0759	98.5262
	2504.77	91.089	98.4874
	2508.5	90.8979	98.5215
	2512.23	90.7899	98.4085
	2515.95	90.6416	98.2452
	2519.68	90.3353	98.1001
	2523.41	90.0485	98.1346
	2527.14	89.8059	98.3002
	2530.86	89.7949	98.397
	2534.59	89.7366	98.5165
	2538.32	89.5064	98.4002
	2542.04	89.4358	98.2408
	2545.77	89.412	98.2657
	2549.5	89.2574	98.4287
	2553.23	89.1344	98.7211
	2556.95	88.9032	99.1592
	2560.68	88.5066	99.6967
	2564.41	88.1611	100
	2568.14	87.8944	99.8262
	2571.86	87.6285	99.5763
	2575.59	87.7088	99.5529
	2579.32	87.6853	99.6287
	2583.05	87.5759	99.6321
	2586.77	87.8634	99.6577
	2590.5	88.2517	99.6539
	2594.23	88.7871	99.5616
	2597.95	89.1644	99.493
	2601.68	89.2368	99.4959
	2605.41	89.4733	99.4836
	2609.14	89.669	99.48
	2612.86	89.9407	99.2618
	2616.59	90.2981	99.0093
	2620.32	90.5082	98.9947
	2624.05	90.5201	99.0014
	2627.77	90.5545	98.9189
	2631.5	90.3492	98.868
	2635.23	89.9169	98.7191
	2638.96	89.7719	98.6046
	2642.68	89.9899	98.586
	2646.41	90.0223	98.4745
	2650.14	89.8854	98.32
	2653.86	89.8303	98.2188
	2657.59	89.7885	98.1322
	2661.32	89.7744	98.0534
	2665.05	89.8333	97.9886
	2668.77	89.6872	97.9745
	2672.5	89.5309	97.9548
	2676.23	89.4984	97.8998
	2679.96	89.4933	97.779
	2683.68	89.5649	97.5872
	2687.41	89.7067	97.4205
	2691.14	89.8415	97.3539
	2694.87	89.7341	97.3243
	2698.59	89.5971	97.2641
	2702.32	89.6811	97.0993
	2706.05	89.6169	96.9085
	2709.77	89.4824	96.7686
	2713.5	89.5105	96.6499
	2717.23	89.698	96.5663
	2720.96	89.9056	96.538
	2724.68	90.0956	96.5638
	2728.41	90.2603	96.6308
	2732.14	90.5073	96.7092
	2735.87	90.8085	96.7351
	2739.59	90.9247	96.7161
	2743.32	90.865	96.7491
	2747.05	90.8226	96.7687
	2750.78	90.6629	96.847
	2754.5	90.2775	96.9907
	2758.23	90.0756	97.0453
	2761.96	89.8837	97.0263
	2765.68	89.561	97.1148
	2769.41	89.3924	97.2594
	2773.14	89.2805	97.2858
	2776.87	89.102	97.3565
	2780.59	88.9419	97.6573
	2784.32	88.6036	97.8812
	2788.05	88.4242	97.947
	2791.78	88.5708	97.8055
	2795.5	88.8124	97.6956
	2799.23	89.2788	97.7674
	2802.96	89.6986	97.8728
	2806.69	89.9092	97.7451
	2810.41	90.0902	97.5616
	2814.14	90.0743	97.4846
	2817.87	89.8738	97.5457
	2821.59	89.7204	97.5647
	2825.32	89.6948	97.4547
	2829.05	89.8421	97.4407
	2832.78	89.8383	97.4922
	2836.5	89.5699	97.5357
	2840.23	89.3675	97.6915
	2843.96	89.1707	98.0065
	2847.69	88.9715	98.3084
	2851.41	88.6739	98.5645
	2855.14	88.4757	98.7908
	2858.87	88.4161	98.8906
	2862.6	88.4381	98.8445
	2866.32	88.5517	98.8298
	2870.05	88.6143	98.9268
	2873.78	88.4711	99.1128
	2877.5	88.1774	99.3537
	2881.23	87.9987	99.5752
	2884.96	88.0398	99.6705
	2888.69	87.928	99.5954
	2892.41	87.6156	99.5413
	2896.14	87.3007	99.5961
	2899.87	86.8996	99.62
	2903.6	86.5936	99.5278
	2907.32	86.6887	99.343
	2911.05	87.3112	99.1782
	2914.78	88.1639	98.9842
	2918.51	88.6651	98.4987
	2922.23	89.0725	97.5126
	2925.96	89.4988	96.3987
	2929.69	89.5555	96.3862
	2933.41	89.6117	97.803
	2937.14	89.9403	99.1544
	2940.87	90.1896	99.6147
	2944.6	90.1974	99.5884
	2948.32	90.3372	99.4117
	2952.05	90.5641	99.1488
	2955.78	90.6283	98.8363
	2959.51	90.553	98.5942
	2963.23	90.4554	98.6372
	2966.96	90.487	98.8632
	2970.69	90.6377	99.0611
	2974.42	90.8111	98.9488
	2978.14	90.6005	98.6327
	2981.87	90.2999	98.3839
	2985.6	90.2248	98.1277
	2989.32	90.0507	97.7867
	2993.05	89.7571	97.4669
	2996.78	89.6594	97.1275
	3000.51	89.8624	96.9265
	3004.23	90.3896	97.0575
	3007.96	90.8134	97.4182
	3011.69	90.9069	97.7479
	3015.42	90.8896	97.9452
	3019.14	90.8894	97.9656
	3022.87	90.8864	97.8485
	3026.6	90.8714	97.5984
	3030.33	90.7407	97.3722
	3034.05	90.5349	97.0976
	3037.78	90.4874	96.7343
	3041.51	90.5617	96.2621
	3045.24	90.6316	95.6702
	3048.96	90.7634	95.2117
	3052.69	91.0909	95.2176
	3056.42	91.4697	95.5678
	3060.14	91.5594	95.8733
	3063.87	91.7497	95.9123
	3067.6	92.0853	95.8746
	3071.33	92.3194	95.8071
	3075.05	92.4723	95.7909
	3078.78	92.4046	95.7962
	3082.51	92.609	95.8038
	3086.24	93.0204	96.0345
	3089.96	93.2039	96.7375
	3093.69	93.4899	97.4011
	3097.42	93.7953	97.5088
	3101.15	93.5971	97.382
	3104.87	93.4902	97.5422
	3108.6	93.9761	97.845
	3112.33	94.1345	97.8794
	3116.05	94.0456	97.5694
	3119.78	94.1011	97.4497
	3123.51	94.3717	97.6195
	3127.24	94.6657	97.7584
	3130.96	94.6288	97.6427
	3134.69	94.5862	97.6403
	3138.42	94.7034	97.6846
	3142.15	94.7363	97.7933
	3145.87	94.9156	97.8438
	3149.6	94.8978	97.9407
	3153.33	94.8337	98.1778
	3157.06	95.29	98.2955
	3160.78	95.4021	98.1818
	3164.51	95.2099	98.1613
	3168.24	95.5349	98.3554
	3171.96	95.8722	98.4872
	3175.69	95.7133	98.3935
	3179.42	95.5134	98.4487
	3183.15	95.6582	98.439
	3186.87	95.817	98.2634
	3190.6	95.9675	98.1434
	3194.33	96.2043	98.0772
	3198.06	96.2179	97.8975
	3201.78	96.0304	97.7683
	3205.51	96.0712	97.7055
	3209.24	96.0421	97.6835
	3212.97	96.1394	97.5657
	3216.69	96.3111	97.4894
	3220.42	96.2235	97.5904
	3224.15	96.2428	97.6826
	3227.87	96.6327	97.6471
	3231.6	96.3658	97.7221
	3235.33	96.4007	97.7569
	3239.06	97.1376	97.8256
	3242.78	97.3906	97.9189
	3246.51	97.1045	97.9901
	3250.24	96.8118	97.9483
	3253.97	97.0268	98.0217
	3257.69	97.4536	98.1116
	3261.42	97.3045	98.1481
	3265.15	97.1729	98.1299
	3268.88	97.3754	98.0746
	3272.6	97.3868	98.1063
	3276.33	97.3056	98.1681
	3280.06	97.3493	98.1664
	3283.78	97.4744	98.166
	3287.51	97.5366	98.1064
	3291.24	97.4665	98.218
	3294.97	97.4134	98.2181
	3298.69	97.5743	97.9686
	3302.42	97.8004	97.809
	3306.15	97.6911	97.7561
	3309.88	97.6269	97.6262
	3313.6	97.5158	97.4992
	3317.33	97.3145	97.3004
	3321.06	97.4185	97.0609
	3324.79	97.5402	96.9472
	3328.51	97.525	96.8388
	3332.24	97.7784	96.4809
	3335.97	97.8028	96.1243
	3339.69	97.5371	95.7363
	3343.42	97.4398	95.3848
	3347.15	97.505	95.073
	3350.88	97.3972	94.6975
	3354.6	97.4427	94.2053
	3358.33	97.4225	93.7818
	3362.06	97.4415	93.382
	3365.79	97.6	93.187
	3369.51	97.5725	93.0152
	3373.24	97.204	92.9227
	3376.97	97.1178	93.0361
	3380.7	97.4427	92.9442
	3384.42	97.2857	93.0326
	3388.15	97.3683	93.3017
	3391.88	97.9475	93.27
	3395.6	97.8968	93.1004
	3399.33	97.4549	92.2747
	3403.06	97.3059	91.028
	3406.79	97.549	89.8257
	3410.51	97.5875	88.6148
	3414.24	97.5379	87.5835
	3417.97	97.4639	87.0085
	3421.7	97.4149	86.6525
	3425.42	97.2832	86.6546
	3429.15	97.2806	87.0776
	3432.88	97.8964	87.937
	3436.61	98.2993	89.189
	3440.33	98.2004	90.6512
	3444.06	98.03	91.9271
	3447.79	97.7291	93.2711
	3451.51	97.6841	94.5478
	3455.24	97.68	95.5203
	3458.97	97.6412	96.2151
	3462.7	97.8169	96.9627
	3466.42	97.8531	97.6305
	3470.15	97.7353	98.1218
	3473.88	97.5834	98.3505
	3477.61	97.4884	98.5244
	3481.33	97.5044	98.7988
	3485.06	97.8102	98.8908
	3488.79	97.7063	98.7527
	3492.52	97.3145	98.8103
	3496.24	97.5563	98.867
	3499.97	97.5589	98.7813
	3503.7	97.3053	98.6994
	3507.42	97.4923	98.65
	3511.15	97.6483	98.5414
	3514.88	97.5426	98.3856
	3518.61	97.7176	98.0756
	3522.33	97.7793	97.8024
	3526.06	97.5815	97.6516
	3529.79	97.8016	97.6492
	3533.52	98.037	97.5833
	3537.24	97.5231	97.5391
	3540.97	97.472	97.3603
	3544.7	97.9694	97.1516
	3548.43	97.7485	97.0613
	3552.15	97.538	96.991
	3555.88	97.8208	96.746
	3559.61	97.8697	96.6175
	3563.34	97.8501	96.5939
	3567.06	97.5545	96.552
	3570.79	97.3938	96.5455
	3574.52	97.595	96.5107
	3578.24	97.7565	96.3795
	3581.97	97.9547	96.5846
	3585.7	97.9119	96.8072
	3589.43	97.765	96.7381
	3593.15	97.8189	96.6017
	3596.88	97.8201	96.6679
	3600.61	97.7441	96.8073
	3604.34	97.8226	96.8934
	3608.06	97.7299	96.9899
	3611.79	97.4536	97.1208
	3615.52	97.6047	97.2195
	3619.24	97.6879	97.2732
	3622.97	97.7306	97.308
	3626.7	97.7724	97.4642
	3630.43	97.7451	97.592
	3634.15	97.7275	97.7359
	3637.88	97.8252	97.8212
	3641.61	97.8632	97.8855
	3645.34	97.6123	97.7981
	3649.06	97.4348	97.7278
	3652.79	97.7337	97.8425
	3656.52	98.0201	98.0303
	3660.25	98.1041	98.0751
	3663.97	97.9527	97.9504
	3667.7	97.7901	97.8697
	3671.43	97.8948	97.9161
	3675.16	98.1085	98.1305
	3678.88	98.3956	98.3156
	3682.61	98.4706	98.5027
	3686.34	98.0401	98.7859
	3690.06	97.8037	99.0616
	3693.79	97.9098	99.1971
	3697.52	97.9512	99.2185
	3701.25	97.9514	99.1725
	3704.97	98.1882	99.1623
	3708.7	97.9847	99.3397
	3712.43	97.814	99.4693
	3716.16	98.1246	99.5024
	3719.88	98.2387	99.4511
	3723.61	97.9	99.4183
	3727.34	97.9423	99.4352
	3731.07	98.0149	99.4416
	3734.79	97.94	99.3661
	3738.52	98.0511	99.2506
	3742.25	97.8175	99.1952
	3745.97	97.5698	99.3589
	3749.7	97.8081	99.3654
	3753.43	98.1153	99.2837
	3757.16	98.0738	99.3204
	3760.88	97.8225	99.3392
	3764.61	98.0029	99.1965
	3768.34	98.2774	99.1641
	3772.07	98.1477	99.2371
	3775.79	97.8423	99.199
	3779.52	97.7557	99.1577
	3783.25	97.9138	99.1928
	3786.98	98.1075	99.1168
	3790.7	98.1038	99.1533
	3794.43	97.9619	99.1462
	3798.16	97.7352	99.1444
	3801.88	97.6398	99.1387
	3805.61	97.7479	99.0973
	3809.34	97.8012	99.1454
	3813.07	97.9253	99.1899
	3816.79	98.072	99.1985
	3820.52	97.7978	99.2987
	3824.25	97.6286	99.2909
	3827.98	97.8111	99.1674
	3831.7	98.1597	99.151
	3835.43	98.1963	99.2134
	3839.16	97.8165	99.1676
	3842.89	97.7462	99.1633
	3846.61	97.9923	99.2142
	3850.34	97.85	99.214
	3854.07	97.6243	99.1892
	3857.79	97.6102	99.2019
	3861.52	97.73	99.186
	3865.25	97.8129	99.1606
	3868.98	97.6887	99.1745
	3872.7	97.5164	99.3402
	3876.43	97.7403	99.2909
	3880.16	97.9568	99.0606
	3883.89	97.7978	98.9469
	3887.61	97.6535	98.9469
	3891.34	97.6375	98.987
	3895.07	97.5548	99.0048
	3898.8	97.5782	98.9886
	3902.52	97.5817	98.9753
	3906.25	97.716	98.8413
	3909.98	97.5748	98.7005
	3913.7	97.3766	98.7836
	3917.43	97.5234	98.943
	3921.16	97.4504	98.8587
	3924.89	97.2412	98.7772
	3928.61	97.4445	98.8952
	3932.34	97.628	99.006
	3936.07	97.5012	98.9221
	3939.8	97.5443	98.8181
	3943.52	97.6498	98.8149
	3947.25	97.5546	98.8887
	3950.98	97.5442	98.8807
	3954.71	97.6124	98.9189
	3958.43	97.658	98.938
	3962.16	97.6543	98.8536
	3965.89	97.6185	98.7308
	3969.61	97.5038	98.6578
	3973.34	97.4237	98.7068
	3977.07	97.5505	98.7968
	3980.8	97.4867	98.7991
	3984.52	97.4437	98.8582
	3988.25	97.8076	98.84
	3991.98	98.9425	98.795
	3995.71	99.4637	98.8786
	3999.43	100	98.9524
		--	98.9306
		--	98.9644
		--	98.9783

## Sheet: Sheet5
	0.01667	0.00151
	0.03333	-0.00013262
	0.05	0.00109
	0.06667	-9.38773e-05
	0.08333	-0.000461936
	0.1	0.000199676		Chromatogram 1
	0.11667	-0.00255
	0.13333	-0.00271
	0.15	0.00264
	0.16667	0.00236
	0.18333	-0.000613928
	0.2	-0.00434
	0.21667	-0.00589
	0.23333	-0.00603
	0.25	-0.00364
	0.26667	-0.000810623
	0.28333	0.000631809
	0.3	0.000880659
	0.31667	3.42727e-05
	0.33333	-0.000171363
	0.35	-0.00188
	0.36667	-0.00147
	0.38333	0.000798702
	0.4	0.00109
	0.41667	0.000487268
	0.43333	0.000235438
	0.45	-0.000984967
	0.46667	0.00352
	0.48333	0.00383
	0.5	0.00367
	0.51667	0.000363588
	0.53333	-0.000452995
	0.55	0.000533462
	0.56667	0.00142
	0.58333	-0.00149
	0.6	-0.000524521
	0.61667	-0.00113
	0.63333	-0.00163
	0.65	-0.00181
	0.66667	-0.000809133
	0.68333	3.72529e-05
	0.7	4.61936e-05
	0.71667	-0.000193715
	0.73333	-0.00106
	0.75	-0.000669062
	0.76667	-0.00122
	0.78333	0.00185
	0.8	0.00334
	0.81667	-0.00344
	0.83333	-0.00626
	0.85	-0.00587
	0.86667	-0.00546
	0.88333	-0.00356
	0.9	-0.00159
	0.91667	-0.00122
	0.93333	0.000226498
	0.95	0.00447
	0.96667	0.00477
	0.98333	0.00142
	1	-0.00103
	1.01667	-0.00245
	1.03333	-0.00309
	1.05	-0.00282
	1.06667	-0.00209
	1.08333	-0.0044
	1.1	-0.00131
	1.11667	-0.0029
	1.13333	-0.00409
	1.15	-0.0067
	1.16667	-0.0072
	1.18333	-0.00385
	1.2	-0.00263
	1.21667	-0.00321
	1.23333	-0.00589
	1.25	-0.00583
	1.26667	-0.00497
	1.28333	-0.00705
	1.3	-0.00617
	1.31667	-0.00242
	1.33333	-0.00377
	1.35	-0.00574
	1.36667	-0.00629
	1.38333	-0.00317
	1.4	-0.0068
	1.41667	-0.00689
	1.43333	-0.0063
	1.45	-0.00725
	1.46667	-0.00774
	1.48333	-0.00744
	1.5	-0.00711
	1.51667	-0.00895
	1.53333	-0.00809
	1.55	-0.00295
	1.56667	-0.00354
	1.58333	-0.00468
	1.6	-0.00334
	1.61667	-0.00366
	1.63333	-0.00597
	1.65	-0.00519
	1.66667	-0.0044
	1.68333	-0.00598
	1.7	-0.00771
	1.71667	-0.00314
	1.73333	-0.00152
	1.75	-0.00314
	1.76667	-0.00475
	1.78333	-0.00407
	1.8	-0.00313
	1.81667	-0.00358
	1.83333	-0.00547
	1.85	-0.0041
	1.86667	-0.00382
	1.88333	-0.00492
	1.9	-0.00499
	1.91667	-0.00425
	1.93333	-0.00353
	1.95	-0.00173
	1.96667	-0.00419
	1.98333	-0.00349
	2	-0.01203
	2.01667	-0.00807
	2.03333	-0.0059
	2.05	-0.01036
	2.06667	-0.00825
	2.08333	-0.00434
	2.1	-0.00543
	2.11667	-0.00314
	2.13333	-0.00314
	2.15	-0.00314
	2.16667	-0.00314
	2.18333	-0.00314
	2.2	-0.00314
	2.21667	-0.00314
	2.23333	-0.00314
	2.25	-0.00314
	2.26667	-0.00314
	2.28333	-0.00314
	2.3	-0.00314
	2.31667	-0.00314
	2.33333	-0.00314
	2.35	-0.00434
	2.36667	-0.00543
	2.38333	-0.00314
	2.4	-0.00314
	2.41667	-0.00314
	2.43333	-0.00314
	2.45	-0.00314
	2.46667	-0.00314
	2.48333	-0.00314
	2.5	-0.00314
	2.51667	-0.00314
	2.53333	-0.00314
	2.55	-0.00314
	2.56667	-0.00314
	2.58333	-0.00314
	2.6	-0.00314
	2.61667	-0.00314
	2.63333	-0.00314
	2.65	-0.00314
	2.66667	-0.00314
	2.68333	-0.00314
	2.7	-0.00314
	2.71667	-0.00314
	2.73333	-0.00314
	2.75	-0.00314
	2.76667	-0.00314
	2.78333	-0.00314
	2.8	-0.00314
	2.81667	-0.00314
	2.83333	-0.00314
	2.85	-0.00434
	2.86667	-0.00543
	2.88333	-0.00314
	2.9	-0.00314
	2.91667	-0.00314
	2.93333	-0.00314
	2.95	-0.00314
	2.96667	-0.00314
	2.98333	-0.00314
	3	-0.00314
	3.01667	-0.00314
	3.03333	-0.00314
	3.05	-0.00314
	3.06667	-0.00314
	3.08333	-0.00314
	3.1	-0.00314
	3.11667	-0.00314
	3.13333	-0.00314
	3.15	-0.00314
	3.16667	-0.00447
	3.18333	-0.00516
	3.2	-0.0081
	3.21667	-0.00866
	3.23333	-0.00716
	3.25	-0.01018
	3.26667	-0.01495
	3.28333	-0.01203
	3.3	-0.00807
	3.31667	-0.0059
	3.33333	-0.01036
	3.35	-0.00825
	3.36667	-0.00434
	3.38333	-0.00543
	3.4	-0.00314
	3.41667	-0.00314
	3.43333	-0.00314
	3.45	-0.00314
	3.46667	-0.00314
	3.48333	-0.00314
	3.5	-0.00314
	3.51667	-0.00314
	3.53333	-0.00314
	3.55	-0.00314
	3.56667	-0.00314
	3.58333	-0.00314
	3.6	-0.00314
	3.61667	-0.00314
	3.63333	-0.00434
	3.65	-0.00543
	3.66667	-0.00314
	3.68333	-0.00314
	3.7	-0.00314
	3.71667	-0.00314
	3.73333	-0.00314
	3.75	-0.00314
	3.76667	-0.00314
	3.78333	-0.00314
	3.8	-0.00314
	3.81667	-0.00314
	3.83333	-0.00314
	3.85	-0.00314
	3.86667	-0.00314
	3.88333	-0.00314
	3.9	-0.00314
	3.91667	-0.00314
	3.93333	-0.00314
	3.95	-0.00314
	3.96667	-0.00314
	3.98333	-0.00314
	4	-0.00314
	4.01667	-0.00314
	4.03333	-0.00447
	4.05	-0.00516
	4.06667	-0.0081
	4.08333	-0.00866
	4.1	-0.00716
	4.11667	-0.01018
	4.13333	-0.01495
	4.15	-0.01203
	4.16667	-0.00807
	4.18333	-0.0059
	4.2	-0.01036
	4.21667	-0.00825
	4.23333	-0.00434
	4.25	-0.00543
	4.26667	-0.00314
	4.28333	-0.00314
	4.3	-0.00314
	4.31667	-0.00314
	4.33333	-0.00314
	4.35	-0.00314
	4.36667	-0.00314
	4.38333	-0.00314
	4.4	-0.00314
	4.41667	-0.00314
	4.43333	-0.00314
	4.45	-0.00314
	4.46667	-0.00314
	4.48333	-0.00314
	4.5	-0.00434
	4.51667	-0.00543
	4.53333	-0.00314
	4.55	-0.00314
	4.56667	-0.00314
	4.58333	-0.00314
	4.6	-0.00314
	4.61667	-0.00314
	4.63333	-0.00314
	4.65	-0.00314
	4.66667	-0.00314
	4.68333	-0.00314
	4.7	-0.00314
	4.71667	-0.00314
	4.73333	-0.00314
	4.75	-0.00314
	4.76667	-0.00314
	4.78333	-0.00314
	4.8	-0.00314
	4.81667	-0.00314
	4.83333	-0.00314
	4.85	-0.00314
	4.86667	-0.00314
	4.88333	-0.00314
	4.9	-0.00314
	4.91667	-0.00434
	4.93333	-0.00543
	4.95	-0.00314
	4.96667	-0.00314
	4.98333	-0.00314
	5	-0.00314
	5.01667	-0.00314
	5.03333	-0.00314
	5.05	-0.00314
	5.06667	-0.00314
	5.08333	-0.00314
	5.1	-0.00314
	5.11667	-0.00314
	5.13333	-0.00314
	5.15	-0.00314
	5.16667	-0.00314
	5.18333	-0.00314
	5.2	-0.00314
	5.21667	-0.00314
	5.23333	-0.00447
	5.25	-0.00516
	5.26667	-0.0081
	5.28333	-0.00866
	5.3	-0.00716
	5.31667	-0.01018
	5.33333	-0.01495
	5.35	-0.01203
	5.36667	-0.00807
	5.38333	-0.0059
	5.4	-0.01036
	5.41667	-0.00825
	5.43333	-0.00434
	5.45	-0.00543
	5.46667	-0.00314
	5.48333	-0.00314
	5.5	-0.00314
	5.51667	-0.00314
	5.53333	-0.00314
	5.55	-0.00314
	5.56667	-0.00314
	5.58333	-0.00314
	5.6	-0.00314
	5.61667	-0.00314
	5.63333	-0.00314
	5.65	-0.00314
	5.66667	-0.00314
	5.68333	-0.00314
	5.7	-0.00434
	5.71667	-0.00543
	5.73333	-0.00314
	5.75	-0.00314
	5.76667	-0.00314
	5.78333	-0.00314
	5.8	-0.00314
	5.81667	-0.00314
	5.83333	-0.00314
	5.85	-0.00314
	5.86667	-0.00314
	5.88333	-0.00314
	5.9	-0.00314
	5.91667	-0.00314
	5.93333	-0.00314
	5.95	-0.00314
	5.96667	-0.00314
	5.98333	-0.00314
	6	-0.00314
	6.01667	-0.00314
	6.03333	-0.00314
	6.05	-0.00314
	6.06667	-0.00314
	6.08333	-0.00314
	6.1	-0.00434
	6.11667	-0.00543
	6.13333	-0.00314
	6.15	-0.00314
	6.16667	-0.00314
	6.18333	-0.00314
	6.2	-0.00314
	6.21667	-0.00314
	6.23333	-0.00314
	6.25	-0.00314
	6.26667	-0.00314
	6.28333	-0.00314
	6.3	-0.00314
	6.31667	-0.00314
	6.33333	-0.00314
	6.35	-0.00314
	6.36667	-0.00314
	6.38333	-0.00314
	6.4	-0.00314
	6.41667	-0.00447
	6.43333	-0.00516
	6.45	-0.0081
	6.46667	-0.00866
	6.48333	-0.00716
	6.5	-0.01018
	6.51667	0.00708
	6.53333	0.00765
	6.55	0.00793
	6.56667	0.0089
	6.58333	0.01003
	6.6	0.01281
	6.61667	0.01048
	6.63333	0.01127
	6.65	0.00814
	6.66667	0.01106
	6.68333	0.0093
	6.7	0.00612
	6.71667	0.00683
	6.73333	0.00581
	6.75	0.00735
	6.76667	0.01027
	6.78333	0.01017
	6.8	0.00958
	6.81667	0.00813
	6.83333	0.00796
	6.85	0.01337
	6.86667	0.03198
	6.88333	0.09544
	6.9	0.2488
	6.91667	0.56276
	6.93333	1.01292
	6.95	1.46012
	6.96667	1.70822
	6.98333	1.6394
	7	1.31801
	7.01667	0.91064
	7.03333	0.56147
	7.05	0.32766
	7.06667	0.19227
	7.08333	0.11893
	7.1	0.08368
	7.11667	0.0677
	7.13333	0.05606
	7.15	0.04906
	7.16667	0.04613
	7.18333	0.03876
	7.2	0.03727
	7.21667	0.03634
	7.23333	0.03283
	7.25	0.02988
	7.26667	0.02706
	7.28333	0.02453
	7.3	0.02151
	7.31667	0.02356
	7.33333	0.02066
	7.35	0.01911
	7.36667	0.01663
	7.38333	0.01616
	7.4	0.0164
	7.41667	0.01512
	7.43333	0.01449
	7.45	0.01023
	7.46667	0.00992
	7.48333	0.01083
	7.5	0.00919
	7.51667	0.00883
	7.53333	0.00706
	7.55	0.00603
	7.56667	0.00294
	7.58333	0.00348
	7.6	0.00106
	7.61667	0.00436
	7.63333	0.00459
	7.65	0.00634
	7.66667	-0.00543
	7.68333	-0.00314
	7.7	-0.00314
	7.71667	-0.00314
	7.73333	-0.00314
	7.75	-0.00314
	7.76667	-0.00314
	7.78333	-0.00314
	7.8	-0.00314
	7.81667	-0.00314
	7.83333	-0.00314
	7.85	-0.00314
	7.86667	-0.00314
	7.88333	-0.00314
	7.9	-0.00314
	7.91667	-0.00314
	7.93333	-0.00314
	7.95	-0.00314
	7.96667	-0.00447
	7.98333	-0.00516
	8	-0.0081
	8.01667	-0.00866
	8.03333	-0.00716
	8.05	-0.01018
	8.06667	-0.01495
	8.08333	-0.01203
	8.1	-0.00543
	8.11667	-0.00314
	8.13333	-0.00314
	8.15	-0.00314
	8.16667	-0.00314
	8.18333	-0.00314
	8.2	-0.00314
	8.21667	-0.00314
	8.23333	-0.00314
	8.25	-0.00314
	8.26667	-0.00314
	8.28333	-0.00314
	8.3	-0.00314
	8.31667	-0.00314
	8.33333	0.00634
	8.35	-0.00543
	8.36667	-0.00314
	8.38333	-0.00314
	8.4	-0.00314
	8.41667	-0.00314
	8.43333	-0.00314
	8.45	-0.00314
	8.46667	-0.00314
	8.48333	-0.00314
	8.5	-0.00314
	8.51667	-0.00314
	8.53333	-0.00314
	8.55	-0.00314
	8.56667	-0.00314
	8.58333	-0.00314
	8.6	-0.00314
	8.61667	-0.00314
	8.63333	-0.00314
	8.65	-0.00314
	8.66667	-0.00447
	8.68333	-0.00516
	8.7	0.00121
	8.71667	-0.00195
	8.73333	-0.00344
	8.75	-0.00674
	8.76667	-0.00338
	8.78333	-0.00396
	8.8	0.000236928
	8.81667	0.00924
	8.83333	0.03072
	8.85	0.06617
	8.86667	0.1314
	8.88333	0.22656
	8.9	0.35108
	8.91667	0.49065
	8.93333	0.61064
	8.95	0.67776
	8.96667	0.6787
	8.98333	0.61978
	9	0.51556
	9.01667	0.39189
	9.03333	0.27352
	9.05	0.17749
	9.06667	0.10935
	9.08333	0.06553
	9.1	0.0418
	9.11667	0.02678
	9.13333	0.02082
	9.15	0.01066
	9.16667	0.00378
	9.18333	0.00274
	9.2	0.00339
	9.21667	0.00405
	9.23333	-0.000990927
	9.25	-0.00143
	9.26667	-0.000941753
	9.28333	-0.000911951
	9.3	-0.00278
	9.31667	-0.00362
	9.33333	-0.000695884
	9.35	-0.00447
	9.36667	-0.00516
	9.38333	-0.0081
	9.4	-0.00866
	9.41667	-0.00716
	9.43333	-0.01018
	9.45	-0.01495
	9.46667	-0.01203
	9.48333	-0.00807
	9.5	-0.0059
	9.51667	-0.01036
	9.53333	-0.00825
	9.55	-0.00434
	9.56667	-0.00543
	9.58333	-0.00314
	9.6	-0.00314
	9.61667	-0.00314
	9.63333	-0.00314
	9.65	-0.00314
	9.66667	-0.00314
	9.68333	-0.00314
	9.7	-0.00314
	9.71667	-0.00314
	9.73333	-0.00314
	9.75	-0.00314
	9.76667	-0.00314
	9.78333	-0.00314
	9.8	-0.00314
	9.81667	-0.00434
	9.83333	-0.00543
	9.85	-0.00314
	9.86667	-0.00314
	9.88333	-0.00314
	9.9	-0.00314
	9.91667	-0.00314
	9.93333	-0.00314
	9.95	-0.00314
	9.96667	-0.00314
	9.98333	-0.00314
	10	-0.00314
	10.0167	-0.00314
	10.0333	-0.00314
	10.05	-0.00314
	10.0667	-0.00314
	10.0833	-0.00314
	10.1	-0.00314
	10.1167	-0.00314
	10.1333	-0.00314
	10.15	-0.00314
	10.1667	-0.00314
	10.1833	-0.00314
	10.2	-0.00314
	10.2167	-0.00314
	10.2333	-0.00314
	10.25	-0.00314
	10.2667	-0.00314
	10.2833	-0.00314
	10.3	-0.00314
	10.3167	-0.00314
	10.3333	-0.00314
	10.35	-0.00314
	10.3667	-0.00314
	10.3833	-0.00314
	10.4	-0.00314
	10.4167	-0.00314
	10.4333	0.06845
	10.45	0.07224
	10.4667	0.08343
	10.4833	0.10951
	10.5	0.16422
	10.5167	0.26792
	10.5333	0.44137
	10.55	0.69893
	10.5667	1.03774
	10.5833	1.42071
	10.6	1.78648
	10.6167	2.05877
	10.6333	2.18076
	10.65	2.12623
	10.6667	1.90971
	10.6833	1.59397
	10.7	1.24121
	10.7167	0.91356
	10.7333	0.64351
	10.75	0.4402
	10.7667	0.30537
	10.7833	0.21449
	10.8	0.16348
	10.8167	0.13399
	10.8333	0.11111
	10.85	0.10167
	10.8667	0.0965
	10.8833	0.09276
	10.9	-0.00447
	10.9167	-0.00516
	10.9333	-0.0081
	10.95	-0.00866
	10.9667	-0.00716
	10.9833	-0.01018
	11	-0.01495
	11.0167	-0.01203
	11.0333	-0.00807
	11.05	-0.0059
	11.0667	-0.01036
	11.0833	-0.00825
	11.1	-0.00434
	11.1167	-0.00543
	11.1333	-0.00314
	11.15	-0.00314
	11.1667	-0.00314
	11.1833	-0.00314
	11.2	-0.00314
	11.2167	-0.00314
	11.2333	-0.00314
	11.25	-0.00314
	11.2667	-0.00314
	11.2833	-0.00314
	11.3	-0.00314
	11.3167	-0.00314
	11.3333	-0.00314
	11.35	-0.00314
	11.3667	-0.00434
	11.3833	-0.00543
	11.4	-0.00314
	11.4167	-0.00314
	11.4333	-0.00314
	11.45	-0.00314
	11.4667	-0.00314
	11.4833	-0.00314
	11.5	-0.00314
	11.5167	-0.00314
	11.5333	-0.00314
	11.55	-0.00314
	11.5667	-0.00314
	11.5833	-0.00314
	11.6	-0.00314
	11.6167	-0.00314
	11.6333	-0.00314
	11.65	-0.00314
	11.6667	-0.00314
	11.6833	-0.00447
	11.7	-0.00516
	11.7167	-0.0081
	11.7333	-0.00866
	11.75	-0.00716
	11.7667	-0.01018
	11.7833	-0.01495
	11.8	-0.01203
	11.8167	-0.00807
	11.8333	-0.0059
	11.85	-0.01036
	11.8667	-0.00825
	11.8833	-0.00434
	11.9	-0.00543
	11.9167	-0.00314
	11.9333	-0.00314
	11.95	-0.00314
	11.9667	-0.00314
	11.9833	-0.00314
	12	-0.00314
	12.0167	-0.00434
	12.0333	-0.00543
	12.05	-0.00314
	12.0667	-0.00314
	12.0833	-0.00314
	12.1	-0.00314
	12.1167	-0.00314
	12.1333	-0.00314
	12.15	-0.00314
	12.1667	-0.00314
	12.1833	-0.00314
	12.2	-0.00314
	12.2167	-0.00314
	12.2333	-0.00314
	12.25	-0.00314
	12.2667	-0.00314
	12.2833	-0.00314
	12.3	-0.00314
	12.3167	-0.00314
	12.3333	-0.00314
	12.35	-0.00314
	12.3667	-0.00314
	12.3833	-0.00314
	12.4	-0.00314
	12.4167	-0.00314
	12.4333	-0.00314
	12.45	-0.00314
	12.4667	-0.00314
	12.4833	-0.00314
	12.5	-0.00314
	12.5167	-0.00314
	12.5333	-0.00314
	12.55	-0.00314
	12.5667	-0.00314
	12.5833	-0.00314
	12.6	-0.00314
	12.6167	-0.00314
	12.6333	-0.00314
	12.65	-0.00314
	12.6667	-0.00314
	12.6833	-0.00314
	12.7	-0.00314
	12.7167	-0.00314
	12.7333	-0.00314
	12.75	-0.00314
	12.7667	-0.00314
	12.7833	-0.00314
	12.8	-0.00314
	12.8167	-0.00314
	12.8333	-0.00314
	12.85	-0.00314
	12.8667	-0.00314
	12.8833	-0.00314
	12.9	-0.00314
	12.9167	-0.00314
	12.9333	-0.00314
	12.95	0.60482
	12.9667	0.7459
	12.9833	0.88366
	13	1.00609
	13.0167	1.10513
	13.0333	1.1678
	13.05	1.18851
	13.0667	1.16834
	13.0833	1.10453
	13.1	1.00731
	13.1167	0.88723
	13.1333	0.75364
	13.15	0.62551
	13.1667	0.50485
	13.1833	0.39581
	13.2	0.31057
	13.2167	0.24453
	13.2333	0.19655
	13.25	0.16168
	13.2667	0.13501
	13.2833	-0.00314
	13.3	-0.00314
	13.3167	-0.00314
	13.3333	-0.00314
	13.35	-0.00314
	13.3667	-0.00314
	13.3833	-0.00314
	13.4	-0.00314
	13.4167	-0.00314
	13.4333	-0.00314
	13.45	-0.00314
	13.4667	-0.00314
	13.4833	-0.00314
	13.5	-0.00314
	13.5167	-0.00314
	13.5333	-0.00314
	13.55	-0.00447
	13.5667	-0.00516
	13.5833	-0.0081
	13.6	-0.00866
	13.6167	-0.00716
	13.6333	-0.01018
	13.65	-0.01495
	13.6667	-0.01203
	13.6833	-0.00543
	13.7	-0.00314
	13.7167	-0.00314
	13.7333	-0.00314
	13.75	-0.00314
	13.7667	-0.00314
	13.7833	-0.00314
	13.8	-0.00314
	13.8167	-0.00314
	13.8333	-0.00314
	13.85	-0.00314
	13.8667	-0.00314
	13.8833	-0.00314
	13.9	-0.00447
	13.9167	-0.00516
	13.9333	-0.0081
	13.95	-0.00866
	13.9667	-0.00716
	13.9833	-0.01018
	14	-0.01495
	14.0167	-0.01203
	14.0333	-0.00543
	14.05	-0.00314
	14.0667	-0.00314
	14.0833	-0.00314
	14.1	-0.00314
	14.1167	-0.00314
	14.1333	-0.00314
	14.15	-0.00314
	14.1667	0.17943
	14.1833	0.24751
	14.2	0.34108
	14.2167	0.4655
	14.2333	0.6225
	14.25	0.80784
	14.2667	1.01847
	14.2833	1.24591
	14.3	1.46623
	14.3167	1.66555
	14.3333	1.82773
	14.35	1.93814
	14.3667	1.97823
	14.3833	1.95294
	14.4	1.86444
	14.4167	1.71842
	14.4333	1.53553
	14.45	1.32801
	14.4667	1.11577
	14.4833	0.9132
	14.5	0.73171
	14.5167	0.5741
	14.5333	0.44683
	14.55	0.34601
	14.5667	0.26675
	14.5833	0.20838
	14.6	0.16991
	14.6167	-0.00314
	14.6333	-0.00314
	14.65	-0.00314
	14.6667	-0.00314
	14.6833	-0.00314
	14.7	-0.00434
	14.7167	-0.00543
	14.7333	-0.00314
	14.75	-0.00314
	14.7667	-0.00314
	14.7833	-0.00314
	14.8	-0.00314
	14.8167	-0.00314
	14.8333	-0.00314
	14.85	-0.00314
	14.8667	-0.00314
	14.8833	-0.00314
	14.9	-0.00314
	14.9167	-0.00314
	14.9333	-0.00314
	14.95	-0.00314
	14.9667	-0.00314
	14.9833	-0.00314
	15	-0.00314
	15.0167	-0.00447
	15.0333	-0.00516
	15.05	-0.0081
	15.0667	-0.00866
	15.0833	-0.00716
	15.1	-0.01018
	15.1167	-0.01495
	15.1333	-0.01203
	15.15	-0.00807
	15.1667	-0.0059
	15.1833	-0.01036
	15.2	-0.00825
	15.2167	-0.00434
	15.2333	-0.00543
	15.25	-0.00314
	15.2667	-0.00314
	15.2833	-0.00314
	15.3	-0.00314
	15.3167	-0.00314
	15.3333	-0.00314
	15.35	-0.00314
	15.3667	-0.00314
	15.3833	-0.00314
	15.4	-0.00314
	15.4167	-0.00314
	15.4333	-0.00314
	15.45	-0.00314
	15.4667	-0.00314
	15.4833	-0.00434
	15.5	-0.00543
	15.5167	-0.00314
	15.5333	-0.00314
	15.55	-0.00314
	15.5667	-0.00314
	15.5833	-0.00314
	15.6	-0.00314
	15.6167	-0.00314
	15.6333	-0.00314
	15.65	-0.00314
	15.6667	-0.00314
	15.6833	-0.00314
	15.7	-0.00314
	15.7167	-0.00314
	15.7333	-0.00314
	15.75	-0.00314
	15.7667	-0.00314
	15.7833	-0.00314
	15.8	-0.00314
	15.8167	-0.00314
	15.8333	-0.00314
	15.85	-0.00314
	15.8667	-0.00314
	15.8833	-0.00447
	15.9	-0.00516
	15.9167	-0.0081
	15.9333	-0.00866
	15.95	-0.00716
	15.9667	-0.01018
	15.9833	-0.01495
	16	-0.01203
	16.0167	-0.00807
	16.0333	-0.0059
	16.05	-0.01036
	16.0667	-0.00825
	16.0833	-0.00434
	16.1	-0.00543
	16.1167	-0.00314
	16.1333	-0.00314
	16.15	-0.00314
	16.1667	-0.00314
	16.1833	-0.00314
	16.2	-0.00314
	16.2167	-0.00314
	16.2333	-0.00314
	16.25	-0.00314
	16.2667	-0.00314
	16.2833	-0.00314
	16.3	-0.00314
	16.3167	-0.00314
	16.3333	-0.00314
	16.35	-0.00434
	16.3667	-0.00543
	16.3833	-0.00314
	16.4	-0.00314
	16.4167	-0.00314
	16.4333	-0.00314
	16.45	-0.00314
	16.4667	-0.00314
	16.4833	-0.00314
	16.5	-0.00314
	16.5167	-0.00314
	16.5333	-0.00314
	16.55	-0.00314
	16.5667	-0.00314
	16.5833	-0.00314
	16.6	-0.00314
	16.6167	-0.00314
	16.6333	-0.00314
	16.65	-0.00314
	16.6667	-0.00314
	16.6833	-0.00314
	16.7	-0.00314
	16.7167	-0.00314
	16.7333	-0.00314
	16.75	-0.00314
	16.7667	-0.00314
	16.7833	-0.00314
	16.8	-0.00314
	16.8167	-0.00314
	16.8333	-0.00314
	16.85	-0.00434
	16.8667	-0.00543
	16.8833	-0.00314
	16.9	-0.00314
	16.9167	-0.00314
	16.9333	-0.00314
	16.95	-0.00314
	16.9667	-0.00314
	16.9833	-0.00314
	17	-0.00314
	17.0167	-0.00447
	17.0333	-0.00516
	17.05	-0.0081
	17.0667	-0.00866
	17.0833	-0.00716
	17.1	-0.01018
	17.1167	-0.01495
	17.1333	-0.01203
	17.15	-0.00807
	17.1667	-0.0059
	17.1833	-0.01036
	17.2	-0.00825
	17.2167	-0.00434
	17.2333	-0.00543
	17.25	-0.00314
	17.2667	-0.00314
	17.2833	-0.00314
	17.3	-0.00314
	17.3167	-0.00314
	17.3333	-0.00314
	17.35	-0.00314
	17.3667	-0.00314
	17.3833	-0.00314
	17.4	-0.00314
	17.4167	-0.00314
	17.4333	-0.00314
	17.45	-0.00314
	17.4667	-0.00314
	17.4833	-0.00434
	17.5	-0.00543
	17.5167	-0.00314
	17.5333	-0.00314
	17.55	-0.00314
	17.5667	-0.00314
	17.5833	-0.00314
	17.6	-0.00314
	17.6167	-0.00314
	17.6333	-0.00314
	17.65	-0.00314
	17.6667	-0.00314
	17.6833	-0.00314
	17.7	-0.00314
	17.7167	-0.00314
	17.7333	-0.00314
	17.75	-0.00314
	17.7667	-0.00314
	17.7833	-0.00314
	17.8	-0.00314
	17.8167	-0.00314
	17.8333	-0.00314
	17.85	-0.00314
	17.8667	-0.00314
	17.8833	-0.00447
	17.9	-0.00516
	17.9167	-0.0081
	17.9333	-0.00866
	17.95	-0.00716
	17.9667	-0.01018
	17.9833	-0.01495
	18	-0.01203
	18.0167	-0.00807
	18.0333	-0.0059
	18.05	-0.01036
	18.0667	-0.00825
	18.0833	-0.00434
	18.1	-0.00543
	18.1167	-0.00314
	18.1333	-0.00314
	18.15	-0.00314
	18.1667	-0.00314
	18.1833	-0.00314
	18.2	-0.00314
	18.2167	-0.00314
	18.2333	-0.00314
	18.25	-0.00314
	18.2667	-0.00314
	18.2833	-0.00314
	18.3	-0.00314
	18.3167	-0.00314
	18.3333	-0.00314
	18.35	-0.00434
	18.3667	-0.00543
	18.3833	-0.00314
	18.4	-0.00314
	18.4167	-0.00314
	18.4333	-0.00314
	18.45	-0.00314
	18.4667	-0.00314
	18.4833	-0.00314
	18.5	-0.00314
	18.5167	-0.00314
	18.5333	-0.00314
	18.55	-0.00314
	18.5667	-0.00314
	18.5833	-0.00314
	18.6	-0.00314
	18.6167	-0.00314
	18.6333	-0.00314
	18.65	-0.00314
	18.6667	-0.00314
	18.6833	-0.00314
	18.7	-0.00314
	18.7167	-0.00314
	18.7333	-0.00314
	18.75	-0.00314
	18.7667	-0.00314
	18.7833	-0.00314
	18.8	-0.00314
	18.8167	-0.00314
	18.8333	-0.00314
	18.85	-0.00434
	18.8667	-0.00543
	18.8833	-0.00314
	18.9	-0.00314
	18.9167	-0.00314
	18.9333	-0.00314
	18.95	-0.00314
	18.9667	-0.00314
	18.9833	-0.00314
	19	-0.00314
	19.0167	-0.00314
	19.0333	-0.00314
	19.05	-0.00314
	19.0667	-0.00314
	19.0833	-0.00314
	19.1	-0.00314
	19.1167	-0.00314
	19.1333	-0.00314
	19.15	-0.00314
	19.1667	-0.00447
	19.1833	-0.00516
	19.2	-0.0081
	19.2167	-0.00866
	19.2333	-0.00716
	19.25	-0.01018
	19.2667	-0.01495
	19.2833	-0.01203
	19.3	-0.00807
	19.3167	-0.0059
	19.3333	-0.01036
	19.35	-0.00825
	19.3667	-0.00434
	19.3833	-0.00543
	19.4	-0.00314
	19.4167	-0.00314
	19.4333	-0.00314
	19.45	-0.00314
	19.4667	-0.00314
	19.4833	-0.00314
	19.5	-0.00314
	19.5167	-0.00314
	19.5333	-0.00314
	19.55	-0.00314
	19.5667	-0.00314
	19.5833	-0.00314
	19.6	-0.00314
	19.6167	-0.00314
	19.6333	-0.00434
	19.65	-0.00543
	19.6667	-0.00314
	19.6833	-0.00314
	19.7	-0.00314
	19.7167	-0.00314
	19.7333	-0.00314
	19.75	-0.00314
	19.7667	-0.00314
	19.7833	-0.00314
	19.8	-0.00314
	19.8167	-0.00314
	19.8333	-0.00314
	19.85	-0.00314
	19.8667	-0.00314
	19.8833	-0.00314
	19.9	-0.00314
	19.9167	-0.00314
	19.9333	-0.00314
	19.95	-0.00314
	19.9667	-0.00314
	19.9833	-0.00314
	20	-0.00314
	20.0167	-0.00314
	20.0333	-0.00447
	20.05	-0.00516
	20.0667	-0.0081
	20.0833	-0.00866
	20.1	-0.00716
	20.1167	-0.01018
	20.1333	-0.01495
	20.15	-0.01203
	20.1667	-0.00807
	20.1833	-0.0059
	20.2	-0.01036
	20.2167	-0.00825
	20.2333	-0.00434
	20.25	-0.00543
	20.2667	-0.00314
	20.2833	-0.00314
	20.3	-0.00314
	20.3167	-0.00314
	20.3333	-0.00314
	20.35	-0.00314
	20.3667	-0.00314
	20.3833	-0.00314
	20.4	-0.00314
	20.4167	-0.00314
	20.4333	-0.00314
	20.45	-0.00314
	20.4667	-0.00314
	20.4833	-0.00314
	20.5	-0.00434
	20.5167	-0.00543
	20.5333	-0.00314
	20.55	-0.00314
	20.5667	-0.00314
	20.5833	-0.00314
	20.6	-0.00314
	20.6167	-0.00314
	20.6333	-0.00314
	20.65	-0.00314
	20.6667	-0.00314
	20.6833	-0.00314
	20.7	-0.00314
	20.7167	-0.00314
	20.7333	-0.00314
	20.75	-0.00314
	20.7667	-0.00314
	20.7833	-0.00314
	20.8	-0.00314
	20.8167	-0.00314
	20.8333	-0.00314
	20.85	-0.00314
	20.8667	-0.00314
	20.8833	-0.00314
	20.9	-0.00314
	20.9167	-0.00434
	20.9333	-0.00543
	20.95	-0.00314
	20.9667	-0.00314
	20.9833	-0.00314
	21	-0.00314
	21.0167	-0.00314
	21.0333	-0.00314
	21.05	-0.00314
	21.0667	-0.00314
	21.0833	-0.00314
	21.1	-0.00314
	21.1167	-0.00314
	21.1333	-0.00314
	21.15	-0.00314
	21.1667	-0.00314
	21.1833	-0.00314
	21.2	-0.00314
	21.2167	-0.00314
	21.2333	-0.00447
	21.25	-0.00516
	21.2667	-0.0081
	21.2833	-0.00866
	21.3	-0.00716
	21.3167	-0.01018
	21.3333	-0.01495
	21.35	-0.01203
	21.3667	-0.00807
	21.3833	-0.0059
	21.4	-0.01036
	21.4167	-0.00825
	21.4333	-0.00434
	21.45	-0.00543
	21.4667	-0.00314
	21.4833	-0.00314
	21.5	-0.00314
	21.5167	-0.00314
	21.5333	-0.00314
	21.55	-0.00314
	21.5667	-0.00314
	21.5833	-0.00314
	21.6	-0.00314
	21.6167	-0.00314
	21.6333	-0.00314
	21.65	-0.00314
	21.6667	-0.00314
	21.6833	-0.00314
	21.7	-0.00434
	21.7167	-0.00543
	21.7333	-0.00314
	21.75	-0.00314
	21.7667	-0.00314
	21.7833	-0.00314
	21.8	-0.00314
	21.8167	-0.00314
	21.8333	-0.00314
	21.85	-0.00314
	21.8667	-0.00314
	21.8833	-0.00314
	21.9	-0.00314
	21.9167	-0.00314
	21.9333	-0.00314
	21.95	-0.00314
	21.9667	-0.00314
	21.9833	-0.00314
	22	-0.00314
	22.0167	-0.00314
	22.0333	-0.00314
	22.05	-0.00314
	22.0667	-0.00314
	22.0833	-0.00314
	22.1	-0.00434
	22.1167	-0.00543
	22.1333	-0.00314
	22.15	-0.00314
	22.1667	-0.00314
	22.1833	-0.00314
	22.2	-0.00314
	22.2167	-0.00314
	22.2333	-0.00314
	22.25	-0.00314
	22.2667	-0.00314
	22.2833	-0.00314
	22.3	-0.00314
	22.3167	-0.00314
	22.3333	-0.00314
	22.35	-0.00314
	22.3667	-0.00314
	22.3833	-0.00314
	22.4	-0.00314
	22.4167	-0.00447
	22.4333	-0.00516
	22.45	-0.0081
	22.4667	-0.00866
	22.4833	-0.00716
	22.5	-0.01018
	22.5167	-0.01495
	22.5333	-0.01203
	22.55	-0.00807
	22.5667	-0.0059
	22.5833	-0.01036
	22.6	-0.00825
	22.6167	-0.00434
	22.6333	-0.00543
	22.65	-0.00314
	22.6667	-0.00314
	22.6833	-0.00314
	22.7	-0.00314
	22.7167	-0.00314
	22.7333	-0.00314
	22.75	-0.00314
	22.7667	-0.00314
	22.7833	-0.00314
	22.8	-0.00314
	22.8167	-0.00314
	22.8333	-0.00314
	22.85	-0.00314
	22.8667	-0.00314
	22.8833	-0.00434
	22.9	-0.00543
	22.9167	-0.00314
	22.9333	-0.00314
	22.95	-0.00314
	22.9667	-0.00314
	22.9833	-0.00314
	23	-0.00314
	23.0167	-0.00314
	23.0333	-0.00314
	23.05	-0.00314
	23.0667	-0.00314
	23.0833	-0.00314
	23.1	-0.00314
	23.1167	-0.00314
	23.1333	-0.00314
	23.15	-0.00314
	23.1667	-0.00314
	23.1833	-0.00314
	23.2	-0.00314
	23.2167	-0.00314
	23.2333	-0.00314
	23.25	-0.00314
	23.2667	-0.00314
	23.2833	-0.00447
	23.3	-0.00516
	23.3167	-0.0081
	23.3333	-0.00866
	23.35	-0.00716
	23.3667	-0.00314
	23.3833	-0.00314
	23.4	-0.00314
	23.4167	-0.00314
	23.4333	-0.00314
	23.45	-0.00434
	23.4667	-0.00543
	23.4833	-0.00314
	23.5	-0.00314
	23.5167	-0.00314
	23.5333	-0.00314
	23.55	-0.00314
	23.5667	-0.00314
	23.5833	-0.00314
	23.6	-0.00314
	23.6167	-0.00314
	23.6333	-0.00314
	23.65	-0.00314
	23.6667	-0.00314
	23.6833	-0.00314
	23.7	-0.00314
	23.7167	-0.00314
	23.7333	-0.00314
	23.75	-0.00314
	23.7667	-0.00447
	23.7833	-0.00516
	23.8	-0.0081
	23.8167	-0.00866
	23.8333	-0.00716
	23.85	-0.01018
	23.8667	-0.01495
	23.8833	-0.01203
	23.9	-0.00807
	23.9167	-0.0059
	23.9333	-0.01036
	23.95	-0.00825
	23.9667	-0.00434
	23.9833	-0.00543
	24	-0.00314
	24.0167	-0.00314
	24.0333	-0.00314
	24.05	-0.00314
	24.0667	-0.00314
	24.0833	-0.00314
	24.1	-0.00314
	24.1167	-0.00314
	24.1333	-0.00314
	24.15	-0.00314
	24.1667	-0.00314
	24.1833	-0.00314
	24.2	-0.00314
	24.2167	-0.00314
	24.2333	-0.00434
	24.25	-0.00543
	24.2667	-0.00314
	24.2833	-0.00314
	24.3	-0.00314
	24.3167	-0.00314
	24.3333	-0.00314
	24.35	-0.00314
	24.3667	-0.00314
	24.3833	-0.00314
	24.4	-0.00314
	24.4167	-0.00314
	24.4333	-0.00314
	24.45	-0.00314
	24.4667	-0.00314
	24.4833	-0.00314
	24.5	-0.00314
	24.5167	-0.00314
	24.5333	-0.00314
	24.55	-0.00314
	24.5667	-0.00314
	24.5833	-0.00314
	24.6	-0.00314
	24.6167	-0.00314
	24.6333	-0.00447
	24.65	-0.00516
	24.6667	-0.0081
	24.6833	-0.00866
	24.7	-0.00716
	24.7167	-0.01018
	24.7333	-0.01495
	24.75	-0.01203
	24.7667	-0.00807
	24.7833	-0.0059
	24.8	-0.01036
	24.8167	-0.00825
	24.8333	-0.00434
	24.85	-0.00543
	24.8667	-0.00314
	24.8833	-0.00314
	24.9	-0.00314
	24.9167	-0.00314
	24.9333	-0.00314
	24.95	-0.00314
	24.9667	-0.00314
	24.9833	-0.00314
	25	-0.00314
	25.0167	-0.00314
	25.0333	-0.00314
	25.05	-0.00314
	25.0667	-0.00314
	25.0833	-0.00314
	25.1	-0.00434
	25.1167	-0.00543
	25.1333	-0.00314
	25.15	-0.00314
	25.1667	-0.00314
	25.1833	-0.00314
	25.2	-0.00314
	25.2167	-0.00314
	25.2333	-0.00314
	25.25	-0.00314
	25.2667	-0.00314
	25.2833	-0.00314
	25.3	-0.00314
	25.3167	-0.00314
	25.3333	-0.00314
	25.35	-0.00314
	25.3667	-0.00314
	25.3833	-0.00314
	25.4	-0.00314
	25.4167	-0.00314
	25.4333	-0.00314
	25.45	-0.00314
	25.4667	-0.00314
	25.4833	-0.00314
	25.5	-0.00314
	25.5167	-0.00314
	25.5333	-0.00314
	25.55	-0.00314
	25.5667	-0.00314
	25.5833	-0.00434
	25.6	-0.00543
	25.6167	-0.00314
	25.6333	-0.00314
	25.65	-0.00314
	25.6667	-0.00314
	25.6833	-0.00314
	25.7	-0.00314
	25.7167	-0.00314
	25.7333	-0.00314
	25.75	-0.00314
	25.7667	-0.00314
	25.7833	-0.00314
	25.8	-0.00314
	25.8167	-0.00314
	25.8333	-0.00314
	25.85	-0.00314
	25.8667	-0.00314
	25.8833	-0.00314
	25.9	-0.00447
	25.9167	-0.00516
	25.9333	-0.0081
	25.95	-0.00866
	25.9667	-0.00716
	25.9833	-0.01018
	26	-0.01495
	26.0167	-0.01203
	26.0333	-0.00807
	26.05	-0.0059
	26.0667	-0.01036
	26.0833	-0.00825
	26.1	-0.00434
	26.1167	-0.00543
	26.1333	-0.00314
	26.15	-0.00314
	26.1667	-0.00314
	26.1833	-0.00314
	26.2	-0.00314
	26.2167	-0.00314
	26.2333	-0.00314
	26.25	-0.00314
	26.2667	-0.00314
	26.2833	-0.00314
	26.3	-0.00314
	26.3167	-0.00314
	26.3333	-0.00314
	26.35	-0.00314
	26.3667	-0.00434
	26.3833	-0.00314
	26.4	-0.00314
	26.4167	-0.00314
	26.4333	-0.00314
	26.45	-0.00314
	26.4667	-0.00434
	26.4833	-0.00543
	26.5	-0.00314
	26.5167	-0.00314
	26.5333	-0.00314
	26.55	-0.00314
	26.5667	-0.00314
	26.5833	-0.00314
	26.6	-0.00314
	26.6167	-0.00314
	26.6333	-0.00314
	26.65	-0.00314
	26.6667	-0.00314
	26.6833	-0.00314
	26.7	-0.00314
	26.7167	-0.00314
	26.7333	-0.00314
	26.75	-0.00314
	26.7667	-0.00314
	26.7833	-0.00447
	26.8	-0.00516
	26.8167	-0.0081
	26.8333	-0.00866
	26.85	-0.00716
	26.8667	-0.01018
	26.8833	-0.01495
	26.9	-0.01203
	26.9167	-0.00807
	26.9333	-0.0059
	26.95	-0.01036
	26.9667	-0.00825
	26.9833	-0.00434
	27	-0.00543
	27.0167	-0.00314
	27.0333	-0.00314
	27.05	-0.00314
	27.0667	-0.00314
	27.0833	-0.00314
	27.1	-0.00314
	27.1167	-0.00314
	27.1333	-0.00314
	27.15	-0.00314
	27.1667	-0.00314
	27.1833	-0.00314
	27.2	-0.00314
	27.2167	-0.00314
	27.2333	-0.00314
	27.25	-0.00434
	27.2667	-0.00543
	27.2833	-0.00314
	27.3	-0.00314
	27.3167	-0.00314
	27.3333	-0.00314
	27.35	-0.00314
	27.3667	-0.00314
	27.3833	-0.00314
	27.4	-0.00314
	27.4167	-0.00314
	27.4333	-0.00314
	27.45	-0.00314
	27.4667	-0.00314
	27.4833	-0.00314
	27.5	-0.00314
	27.5167	-0.00314
	27.5333	-0.00434
	27.55	-0.00543
	27.5667	-0.00314
	27.5833	-0.00314
	27.6	-0.00314
	27.6167	-0.00314
	27.6333	-0.00314
	27.65	-0.00314
	27.6667	-0.00314
	27.6833	-0.00314
	27.7	-0.00314
	27.7167	-0.00314
	27.7333	-0.00314
	27.75	-0.00314
	27.7667	-0.00314
	27.7833	-0.00314
	27.8	-0.00434
	27.8167	-0.00543
	27.8333	-0.00314
	27.85	-0.00314
	27.8667	-0.00314
	27.8833	-0.00314
	27.9	-0.00314
	27.9167	-0.00314
	27.9333	-0.00314
	27.95	-0.00314
	27.9667	-0.00314
	27.9833	-0.00314
	28	-0.00314
	28.0167	-0.00314
	28.0333	-0.00314
	28.05	-0.00314
	28.0667	-0.00314
	28.0833	-0.00314
	28.1	-0.00314
	28.1167	-0.00314
	28.1333	-0.00314
	28.15	-0.00314
	28.1667	-0.00314
	28.1833	-0.00314
	28.2	-0.00447
	28.2167	-0.00516
	28.2333	-0.0081
	28.25	-0.00866
	28.2667	-0.00716
	28.2833	-0.00314
	28.3	-0.00314
	28.3167	-0.00314
	28.3333	-0.00314
	28.35	-0.00314
	28.3667	-0.00434
	28.3833	-0.00543
	28.4	-0.00314
	28.4167	-0.00314
	28.4333	-0.00314
	28.45	-0.00314
	28.4667	-0.00314
	28.4833	-0.00314
	28.5	-0.00314
	28.5167	-0.00314
	28.5333	-0.00314
	28.55	-0.00314
	28.5667	-0.00314
	28.5833	-0.00314
	28.6	-0.00314
	28.6167	-0.00314
	28.6333	-0.00314
	28.65	-0.00314
	28.6667	-0.00314
	28.6833	-0.00447
	28.7	-0.00516
	28.7167	-0.0081
	28.7333	-0.00866
	28.75	-0.00716
	28.7667	-0.01018
	28.7833	-0.01495
	28.8	-0.01203
	28.8167	-0.00807
	28.8333	-0.0059
	28.85	-0.01036
	28.8667	-0.00825
	28.8833	-0.00434
	28.9	-0.00543
	28.9167	-0.00314
	28.9333	-0.00314
	28.95	-0.00314
	28.9667	-0.00314
	28.9833	-0.00314
	29	-0.00314
	29.0167	-0.00314
	29.0333	-0.00314
	29.05	-0.00314
	29.0667	-0.00314
	29.0833	-0.00314
	29.1	-0.00314
	29.1167	-0.00314
	29.1333	-0.00314
	29.15	-0.00434
	29.1667	-0.00543
	29.1833	-0.00314
	29.2	-0.00314
	29.2167	-0.00314
	29.2333	-0.00314
	29.25	-0.00314
	29.2667	-0.00314
	29.2833	-0.00314
	29.3	-0.00314
	29.3167	-0.00314
	29.3333	-0.00314
	29.35	-0.00314
	29.3667	-0.00314
	29.3833	-0.00314
	29.4	-0.00314
	29.4167	-0.00314
	29.4333	-0.00314
	29.45	-0.00314
	29.4667	-0.00314
	29.4833	-0.00314
	29.5	-0.00314
	29.5167	-0.00314
	29.5333	-0.00314
	29.55	-0.00447
	29.5667	-0.00516
	29.5833	-0.0081
	29.6	-0.00866
	29.6167	-0.00716
	29.6333	-0.01018
	29.65	-0.01495
	29.6667	-0.01203
	29.6833	-0.00807
	29.7	-0.0059
	29.7167	-0.01036
	29.7333	-0.00825
	29.75	-0.00434
	29.7667	-0.00543
	29.7833	-0.00314
	29.8	-0.00314
	29.8167	-0.00314
	29.8333	-0.00314
	29.85	-0.00314
	29.8667	-0.00314
	29.8833	-0.00314
	29.9	-0.00314
	29.9167	-0.00314
	29.9333	-0.00314
	29.95	-0.00314
	29.9667	-0.00314
	29.9833	-0.00314
	30	-0.00314
		-0.00434
	0	-0.00543
	0	-0.00314
	0	-0.00314
	0	0.0654
	0	0.0654
	0	0.0654
	0	0.0654
	0	0.0654
	0	0.0654
	0	0.0654
	0	0.0654
	0	0.0654
	0	0.0654
	0	0.0654
	0	0.0654
	0	0.0654
	0	0.0654
	0	0.0654
	0	0.0654
	0	0.0654
	0	0.0654
	0	0.0654
	0	0.0654
	0	0.0654
	0	0.0654
	0	0.0654
	0	0.0654
	0	0.0654
	0	0.0654
		0.0654
		0.0654
		0.0654
		0.0654
		0.0654
		0.0654
		0.0654
		0.0654
		0.0654
		0.0654
		0.0654
		0.0654
		0.0654
		0.0654
		0.0654
		0.0654
		0.0654
		0.0654
		0.0654
		0.0654
		0.0654
		0.0654
		0.0654
		0.0654
		0.0654
		0.0654
		0.0654
		0.0654
		0.0654
		0.0654
		0.0654
		0.0654
		0.0654
		0.0654
		0.0654
		0.0654
		0.0654
		0.0654
		0.0654
		0.0654
		0.0654
		0.0654
		0.0654
		0.0654
		0.0654
		0.0654
		0.0654
		0.0654
		0.0654
		0.0654
		0.0654
		0.0654
		0.0654
		0.0654
		0.0654
		0.0654
		0.0654
		0.0654
		0.0654
		0.0654
		0.0654
		0.0654
		0.0654
		0.0654
		0.0654
		0.0654
		0.0654
		0.0654
		0.0654
		0.0654
		0.0654
		0.0654
		0.0654
		0.0654
		0.0654
		0.0654
		0.0654
		0.0654
		0.0654
		0.0654
		0.0654
		0.0654
		0.0654
		0.0654
		0.0654
		0.0654
		0.0654
		0.0654
		0.0654
		0.0654
		0.0654
		0.0654
		0.0654
		0.0654
		0.0654
		0.0654
		0.0654
		0.0654
		0.0654
		0.0654
		0.0654
		0.0654
		0.0654
		0.0654
		0.0654
		0.0654
		0.0654
		0.0654
		0.0654
		0.0654
		0.0654
		0.0654
		0.0654
		0.0654
		0.0654
		0.0654
		0.0654
		0.0654
		0.0654
		0.0654
		0.0654
		0.0654
		0.0654
		0.0654
		0.0654
		0.0654
		0.0654
		0.0654
		0.0654
		0.0654
		0.0654
		0.0654
		0.0654
		0.0654
		0.0654
		0.0654
		0.0654
		0.0654
		0.0654
		0.0654
		0.0654
		0.0654
		0.0654
		0.0654
		0.0654
		0.0654
		0.0654
		0.0654
		0.0654
		0.0654
		0.0654
		0.0654
		0.0654
		0.0654
		0.0654
		0.0654
		0.0654
		0.0654
		0.0654
		0.0654
		0.0654
		0.0654
		0.0654
		0.0654
		0.0654
		0.0654
		0.0654
		0.0654
		0.0654
		0.0654
[truncated: 31 more rows]

## Sheet: Sheet6
	0.01667	-0.00132
	0.03333	-0.00174
	0.05	-0.00307
	0.06667	-0.000832975
	0.08333	0.00111
	0.1	0.00063777		chromatogram 2
	0.11667	0.000211596
	0.13333	-0.00131
	0.15	-0.00314
	0.16667	-0.00229
	0.18333	-0.00194
	0.2	-0.00221
	0.21667	-0.00659
	0.23333	-0.00497
	0.25	-0.00132
	0.26667	-0.00039041
	0.28333	-0.00303
	0.3	-0.00442
	0.31667	-0.00489
	0.33333	-0.00309
	0.35	-0.00276
	0.36667	-0.0024
	0.38333	-0.00538
	0.4	-0.00691
	0.41667	-0.00473
	0.43333	-0.00368
	0.45	-0.00603
	0.46667	-0.00506
	0.48333	-0.000739098
	0.5	-0.00392
	0.51667	-0.00461
	0.53333	-0.00448
	0.55	-0.00577
	0.56667	-0.00658
	0.58333	-0.00743
	0.6	-0.00681
	0.61667	-0.00601
	0.63333	-0.00854
	0.65	-0.00883
	0.66667	-0.0075
	0.68333	-0.00344
	0.7	-0.00366
	0.71667	-0.00674
	0.73333	-0.00851
	0.75	-0.00787
	0.76667	-0.00924
	0.78333	-0.01142
	0.8	-0.01186
	0.81667	-0.00961
	0.83333	-0.00924
	0.85	-0.00839
	0.86667	-0.0076
	0.88333	-0.0096
	0.9	-0.00987
	0.91667	-0.01134
	0.93333	-0.00999
	0.95	-0.00793
	0.96667	-0.01079
	0.98333	-0.01112
	1	-0.00789
	1.01667	-0.00919
	1.03333	-0.01321
	1.05	-0.01513
	1.06667	-0.01335
	1.08333	-0.01147
	1.1	-0.0147
	1.11667	-0.01076
	1.13333	-0.01337
	1.15	-0.0104
	1.16667	-0.00699
	1.18333	-0.00851
	1.2	-0.00917
	1.21667	-0.00841
	1.23333	-0.00956
	1.25	-0.01122
	1.26667	-0.0118
	1.28333	-0.01204
	1.3	-0.01192
	1.31667	-0.00982
	1.33333	-0.01049
	1.35	-0.01256
	1.36667	-0.01254
	1.38333	-0.01117
	1.4	-0.01268
	1.41667	-0.01101
	1.43333	-0.00976
	1.45	-0.00906
	1.46667	-0.01093
	1.48333	-0.01054
	1.5	-0.01147
	1.51667	-0.01337
	1.53333	-0.0124
	1.55	-0.01208
	1.56667	-0.01524
	1.58333	-0.01237
	1.6	-0.01441
	1.61667	-0.01647
	1.63333	-0.01279
	1.65	-0.01422
	1.66667	-0.01527
	1.68333	-0.01259
	1.7	-0.01364
	1.71667	-0.01355
	1.73333	-0.01145
	1.75	-0.01565
	1.76667	-0.01626
	1.78333	-0.01389
	1.8	-0.01601
	1.81667	-0.01869
	1.83333	-0.02322
	1.85	-0.01988
	1.86667	-0.01655
	1.88333	-0.01455
	1.9	-0.01506
	1.91667	-0.01422
	1.93333	-0.01183
	1.95	-0.01177
	1.96667	-0.01515
	1.98333	-0.01296
	2	-0.01462
	2.01667	-0.01382
	2.03333	-0.01373
	2.05	-0.01139
	2.06667	-0.01103
	2.08333	-0.01281
	2.1	-0.01378
	2.11667	-0.01178
	2.13333	-0.01613
	2.15	-0.01542
	2.16667	-0.01466
	2.18333	-0.01138
	2.2	-0.01437
	2.21667	-0.0135
	2.23333	-0.01545
	2.25	-0.01897
	2.26667	-0.01696
	2.28333	-0.01647
	2.3	-0.01474
	2.31667	-0.01545
	2.33333	-0.01605
	2.35	-0.01797
	2.36667	-0.02026
	2.38333	-0.01638
	2.4	-0.01587
	2.41667	-0.01647
	2.43333	-0.01554
	2.45	-0.01465
	2.46667	-0.01566
	2.48333	-0.01705
	2.5	-0.01386
	2.51667	-0.01269
	2.53333	-0.01399
	2.55	-0.01453
	2.56667	-0.01832
	2.58333	-0.01668
	2.6	-0.01629
	2.61667	-0.01598
	2.63333	-0.01688
	2.65	-0.01623
	2.66667	-0.01803
	2.68333	-0.02002
	2.7	-0.01937
	2.71667	-0.01651
	2.73333	-0.01469
	2.75	-0.0151
	2.76667	-0.01438
	2.78333	-0.01749
	2.8	-0.01774
	2.81667	-0.01591
	2.83333	-0.01772
	2.85	-0.0192
	2.86667	-0.01964
	2.88333	-0.01825
	2.9	-0.02148
	2.91667	-0.01838
	2.93333	-0.01666
	2.95	-0.02113
	2.96667	-0.02354
	2.98333	-0.02052
	3	-0.01923
	3.01667	-0.02101
	3.03333	-0.0203
	3.05	-0.02158
	3.06667	-0.01988
	3.08333	-0.01862
	3.1	-0.01993
	3.11667	-0.01969
	3.13333	-0.01877
	3.15	-0.02096
	3.16667	-0.0198
	3.18333	-0.01884
	3.2	-0.01806
	3.21667	-0.017
	3.23333	-0.02048
	3.25	-0.02062
	3.26667	-0.01755
	3.28333	-0.01343
	3.3	-0.01363
	3.31667	-0.01541
	3.33333	-0.01422
	3.35	-0.01601
	3.36667	-0.01587
	3.38333	-0.01691
	3.4	-0.01832
	3.41667	-0.01824
	3.43333	-0.02153
	3.45	-0.01715
	3.46667	-0.01681
	3.48333	-0.01934
	3.5	-0.02025
	3.51667	-0.02136
	3.53333	-0.02309
	3.55	-0.02084
	3.56667	-0.01612
	3.58333	-0.01611
	3.6	-0.01465
	3.61667	-0.01407
	3.63333	-0.01622
	3.65	-0.01619
	3.66667	-0.01597
	3.68333	-0.01602
	3.7	-0.01832
	3.71667	-0.0205
	3.73333	-0.01726
	3.75	-0.01632
	3.76667	-0.01658
	3.78333	-0.01632
	3.8	-0.01516
	3.81667	-0.01618
	3.83333	-0.01907
	3.85	-0.01984
	3.86667	-0.01782
	3.88333	-0.01671
	3.9	-0.01865
	3.91667	-0.02049
	3.93333	-0.02046
	3.95	-0.02215
	3.96667	-0.02306
	3.98333	-0.016
	4	-0.01445
	4.01667	-0.01433
	4.03333	-0.01438
	4.05	-0.01431
	4.06667	-0.01537
	4.08333	-0.01216
	4.1	-0.01008
	4.11667	-0.01181
	4.13333	-0.01196
	4.15	-0.01442
	4.16667	-0.0161
	4.18333	-0.0165
	4.2	-0.01699
	4.21667	-0.01737
	4.23333	-0.01855
	4.25	-0.02216
	4.26667	-0.02005
	4.28333	-0.01714
	4.3	-0.01611
	4.31667	-0.01683
	4.33333	-0.01582
	4.35	-0.01546
	4.36667	-0.01616
	4.38333	-0.01642
	4.4	-0.01569
	4.41667	-0.01596
	4.43333	-0.01554
	4.45	-0.01423
	4.46667	-0.01301
	4.48333	-0.0152
	4.5	-0.01849
	4.51667	-0.01751
	4.53333	-0.01686
	4.55	-0.01579
	4.56667	-0.0157
	4.58333	-0.01598
	4.6	-0.01499
	4.61667	-0.01652
	4.63333	-0.01737
	4.65	-0.01708
	4.66667	-0.01533
	4.68333	-0.0168
	4.7	-0.01157
	4.71667	-0.01044
	4.73333	-0.01021
	4.75	-0.01226
	4.76667	-0.01719
	4.78333	-0.01568
	4.8	-0.01529
	4.81667	-0.01595
	4.83333	-0.01509
	4.85	-0.01801
	4.86667	-0.01562
	4.88333	-0.01574
	4.9	-0.01312
	4.91667	-0.01344
	4.93333	-0.01446
	4.95	-0.01481
	4.96667	-0.01688
	4.98333	-0.01675
	5	-0.0123
	5.01667	-0.01589
	5.03333	-0.01791
	5.05	-0.01533
	5.06667	-0.01429
	5.08333	-0.01427
	5.1	-0.0158
	5.11667	-0.01648
	5.13333	-0.01778
	5.15	-0.01449
	5.16667	-0.01643
	5.18333	-0.01462
	5.2	-0.01557
	5.21667	-0.01415
	5.23333	-0.01342
	5.25	-0.01348
	5.26667	-0.01443
	5.28333	-0.01259
	5.3	-0.01165
	5.31667	-0.01128
	5.33333	-0.00986
	5.35	-0.01356
	5.36667	-0.01594
	5.38333	-0.01567
	5.4	-0.0189
	5.41667	-0.01647
	5.43333	-0.01427
	5.45	-0.01542
	5.46667	-0.01549
	5.48333	-0.01587
	5.5	-0.01407
	5.51667	-0.01369
	5.53333	-0.01568
	5.55	-0.01733
	5.56667	-0.0199
	5.58333	-0.01955
	5.6	-0.01612
	5.61667	-0.01675
	5.63333	-0.01603
	5.65	-0.01626
	5.66667	-0.01652
	5.68333	-0.0172
	5.7	-0.01739
	5.71667	-0.01579
	5.73333	-0.01433
	5.75	-0.01672
	5.76667	-0.01909
	5.78333	-0.01721
	5.8	-0.01809
	5.81667	-0.02128
	5.83333	-0.0204
	5.85	-0.0197
	5.86667	-0.02227
	5.88333	-0.01788
	5.9	-0.01866
	5.91667	-0.02238
	5.93333	-0.02124
	5.95	-0.02025
	5.96667	-0.02056
	5.98333	-0.01852
	6	-0.01791
	6.01667	-0.01566
	6.03333	-0.01717
	6.05	-0.01674
	6.06667	-0.01626
	6.08333	-0.01728
	6.1	-0.01888
	6.11667	-0.01774
	6.13333	-0.01501
	6.15	-0.01722
	6.16667	-0.01698
	6.18333	-0.0174
	6.2	-0.01954
	6.21667	-0.02126
	6.23333	-0.0226
	6.25	-0.02046
	6.26667	-0.0207
	6.28333	-0.0204
	6.3	-0.01881
	6.31667	-0.01933
	6.33333	-0.02034
	6.35	-0.02023
	6.36667	-0.02103
	6.38333	-0.02107
	6.4	-0.01831
	6.41667	-0.01687
	6.43333	-0.02003
	6.45	-0.02196
	6.46667	-0.02139
	6.48333	-0.02095
	6.5	-0.01781
	6.51667	-0.01916
	6.53333	-0.02045
	6.55	-0.01984
	6.56667	-0.02108
	6.58333	-0.01828
	6.6	-0.01984
	6.61667	-0.02281
	6.63333	-0.02049
	6.65	-0.02322
	6.66667	-0.02022
	6.68333	-0.02101
	6.7	-0.0212
	6.71667	-0.02082
	6.73333	-0.02135
	6.75	-0.02058
	6.76667	-0.02151
	6.78333	-0.02119
	6.8	-0.02274
	6.81667	-0.0216
	6.83333	-0.02223
	6.85	-0.02178
	6.86667	-0.02327
	6.88333	-0.02459
	6.9	-0.02254
	6.91667	-0.02196
	6.93333	-0.02334
	6.95	-0.02155
	6.96667	-0.02073
	6.98333	-0.02139
	7	-0.02025
	7.01667	-0.0199
	7.03333	-0.02148
	7.05	-0.0218
	7.06667	-0.02163
	7.08333	-0.0206
	7.1	-0.02058
	7.11667	-0.01887
	7.13333	-0.0222
	7.15	-0.02203
	7.16667	-0.02405
	7.18333	-0.0283
	7.2	-0.02256
	7.21667	-0.02045
	7.23333	-0.02281
	7.25	-0.02354
	7.26667	-0.02192
	7.28333	-0.02
	7.3	-0.01991
	7.31667	-0.02121
	7.33333	-0.0225
	7.35	-0.02546
	7.36667	-0.02499
	7.38333	-0.02345
	7.4	-0.02195
	7.41667	-0.02028
	7.43333	-0.01963
	7.45	-0.0196
	7.46667	-0.02111
	7.48333	-0.02172
	7.5	-0.01957
	7.51667	-0.01988
	7.53333	-0.02021
	7.55	-0.02043
	7.56667	-0.02277
	7.58333	-0.02504
	7.6	-0.0224
	7.61667	-0.02242
	7.63333	-0.02468
	7.65	-0.02654
	7.66667	-0.02382
	7.68333	-0.02203
	7.7	-0.02192
	7.71667	-0.02598
	7.73333	-0.0192
	7.75	-0.01829
	7.76667	-0.01825
	7.78333	-0.01993
	7.8	-0.02199
	7.81667	-0.02139
	7.83333	-0.02555
	7.85	-0.02438
	7.86667	-0.02479
	7.88333	-0.0245
	7.9	-0.02676
	7.91667	-0.02692
	7.93333	-0.02622
	7.95	-0.02681
	7.96667	-0.02457
	7.98333	-0.02417
	8	-0.02244
	8.01667	-0.02201
	8.03333	-0.01909
	8.05	-0.02007
	8.06667	-0.01993
	8.08333	-0.01925
	8.1	-0.01854
	8.11667	-0.01999
	8.13333	-0.02174
	8.15	-0.02189
	8.16667	-0.02233
	8.18333	-0.02187
	8.2	-0.02509
	8.21667	-0.02337
	8.23333	-0.02406
	8.25	-0.02438
	8.26667	-0.02026
	8.28333	-0.01978
	8.3	-0.01955
	8.31667	-0.02082
	8.33333	-0.01939
	8.35	-0.01948
	8.36667	-0.01944
	8.38333	-0.02149
	8.4	-0.0194
	8.41667	-0.02012
	8.43333	-0.0202
	8.45	-0.01978
	8.46667	-0.02178
	8.48333	-0.0199
	8.5	-0.02017
	8.51667	-0.02064
	8.53333	-0.02259
	8.55	-0.02009
	8.56667	-0.01918
	8.58333	-0.02037
	8.6	-0.01913
	8.61667	-0.0184
	8.63333	-0.02089
	8.65	-0.02002
	8.66667	-0.01755
	8.68333	-0.01811
	8.7	-0.01867
	8.71667	-0.02078
	8.73333	-0.01826
	8.75	-0.01727
	8.76667	-0.01925
	8.78333	-0.0221
	8.8	-0.01985
	8.81667	-0.02057
	8.83333	-0.02082
	8.85	-0.01937
	8.86667	-0.01803
	8.88333	-0.01713
	8.9	-0.02056
	8.91667	-0.02224
	8.93333	-0.02234
	8.95	-0.02129
	8.96667	-0.01948
	8.98333	-0.01895
	9	-0.01391
	9.01667	-0.0158
	9.03333	-0.01799
	9.05	-0.01822
	9.06667	-0.02226
	9.08333	-0.02146
	9.1	-0.02209
	9.11667	-0.02422
	9.13333	-0.02374
	9.15	-0.01997
	9.16667	-0.01789
	9.18333	-0.01686
	9.2	-0.01392
	9.21667	-0.01135
	9.23333	-0.01155
	9.25	-0.01466
	9.26667	-0.01764
	9.28333	-0.0173
	9.3	-0.01792
	9.31667	-0.01788
	9.33333	-0.01688
	9.35	-0.01976
	9.36667	-0.02311
	9.38333	-0.02368
	9.4	-0.02513
	9.41667	-0.02833
	9.43333	-0.02853
	9.45	-0.02792
	9.46667	-0.02772
	9.48333	-0.02812
	9.5	-0.02802
	9.51667	-0.02694
	9.53333	-0.02646
	9.55	-0.01981
	9.56667	-0.00475
	9.58333	0.02622
	9.6	0.08665
	9.61667	0.21067
	9.63333	0.43923
	9.65	0.82055
	9.66667	1.40152
	9.68333	2.1897
	9.7	3.13921
	9.71667	4.11094
	9.73333	4.947
	9.75	5.48775
	9.76667	5.61654
	9.78333	5.32025
	9.8	4.67327
	9.81667	3.82679
	9.83333	2.92985
	9.85	2.11235
	9.86667	1.44479
	9.88333	0.94292
	9.9	0.6026
	9.91667	0.3794
	9.93333	0.23788
	9.95	0.15223
	9.96667	0.10286
	9.98333	0.06925
	10	0.04998
	10.0167	0.03445
	10.0333	0.02185
	10.05	0.01543
	10.0667	0.01251
	10.0833	0.00888
	10.1	0.00557
	10.1167	-0.000838935
	10.1333	-0.00523
	10.15	-0.00788
	10.1667	-0.01352
	10.1833	-0.01715
	10.2	-0.01863
	10.2167	-0.02154
	10.2333	-0.02226
	10.25	-0.02273
	10.2667	-0.02385
	10.2833	-0.02786
	10.3	-0.02535
	10.3167	-0.02476
	10.3333	-0.02622
	10.35	-0.02858
	10.3667	-0.03227
	10.3833	-0.03415
	10.4	-0.03831
	10.4167	-0.04066
	10.4333	-0.04256
	10.45	-0.04167
	10.4667	-0.03832
	10.4833	-0.0366
	10.5	-0.037
	10.5167	-0.03651
	10.5333	-0.03654
	10.55	-0.03841
	10.5667	-0.04261
	10.5833	-0.03947
	10.6	-0.03595
	10.6167	-0.03642
	10.6333	-0.03901
	10.65	-0.0413
	10.6667	-0.0457
	10.6833	-0.048
	10.7	-0.04855
	10.7167	-0.04898
	10.7333	-0.04874
	10.75	-0.04859
	10.7667	-0.04977
	10.7833	-0.05138
	10.8	-0.05196
	10.8167	-0.05443
	10.8333	-0.0577
	10.85	-0.05453
	10.8667	-0.05794
	10.8833	-0.05727
	10.9	-0.05673
	10.9167	-0.0544
	10.9333	-0.05392
	10.95	-0.0554
	10.9667	-0.0599
	10.9833	-0.05998
	11	-0.05925
	11.0167	-0.05653
	11.0333	-0.05839
	11.05	-0.05832
	11.0667	-0.05591
	11.0833	-0.05221
	11.1	-0.05385
	11.1167	-0.04804
	11.1333	-0.04462
	11.15	-0.04564
	11.1667	-0.04257
	11.1833	-0.04123
	11.2	-0.03317
	11.2167	-0.01397
	11.2333	0.02349
	11.25	0.08755
	11.2667	0.19747
	11.2833	0.36767
	11.3	0.60826
	11.3167	0.91074
	11.3333	1.26224
	11.35	1.63311
	11.3667	1.97498
	11.3833	2.24179
	11.4	2.39209
	11.4167	2.40818
	11.4333	2.279
	11.45	2.04126
	11.4667	1.72329
	11.4833	1.3769
	11.5	1.04486
	11.5167	0.75545
	11.5333	0.52095
	11.55	0.34029
	11.5667	0.21473
	11.5833	0.12468
	11.6	0.06633
	11.6167	0.03352
	11.6333	0.01591
	11.65	0.01967
	11.6667	0.03742
	11.6833	0.0801
	11.7	0.15868
	11.7167	0.28677
	11.7333	0.47033
	11.75	0.71017
	11.7667	0.99515
	11.7833	1.30117
	11.8	1.5971
	11.8167	1.83688
	11.8333	1.98565
	11.85	2.02337
	11.8667	1.9512
	11.8833	1.78122
	11.9	1.53919
	11.9167	1.26787
	11.9333	0.99174
	11.95	0.74417
	11.9667	0.53543
	11.9833	0.37239
	12	0.24956
	12.0167	0.15926
	12.0333	0.10118
	12.05	0.05998
	12.0667	0.03131
	12.0833	0.0133
	12.1	0.00384
	12.1167	-0.000602007
	12.1333	-0.00803
	12.15	-0.00922
	12.1667	-0.01374
	12.1833	-0.01243
	12.2	-0.01773
	12.2167	-0.02358
	12.2333	-0.02339
	12.25	-0.02617
	12.2667	-0.02817
	12.2833	-0.02815
	12.3	-0.03025
	12.3167	-0.03224
	12.3333	-0.03427
	12.35	-0.03381
	12.3667	-0.03502
	12.3833	-0.03892
	12.4	-0.04318
	12.4167	-0.04557
	12.4333	-0.04694
	12.45	-0.0475
	12.4667	-0.04904
	12.4833	-0.05115
	12.5	-0.05301
	12.5167	-0.05069
	12.5333	-0.05244
	12.55	-0.05673
	12.5667	-0.0605
	12.5833	-0.06008
	12.6	-0.06171
	12.6167	-0.06295
	12.6333	-0.06656
	12.65	-0.06697
	12.6667	-0.06688
	12.6833	-0.06718
	12.7	-0.07036
	12.7167	-0.06789
	12.7333	-0.06767
	12.75	-0.06897
	12.7667	-0.06933
	12.7833	-0.06919
	12.8	-0.07008
	12.8167	-0.07187
	12.8333	-0.07359
	12.85	-0.07242
	12.8667	-0.07381
	12.8833	-0.07305
	12.9	-0.07003
	12.9167	-0.07007
	12.9333	-0.0673
	12.95	-0.05929
	12.9667	-0.0473
	12.9833	-0.02614
	13	0.00847
	13.0167	0.06254
	13.0333	0.1412
	13.05	0.2511
	13.0667	0.39739
	13.0833	0.57757
	13.1	0.78617
	13.1167	1.01855
	13.1333	1.24875
	13.15	1.46229
	13.1667	1.64023
	13.1833	1.75951
	13.2	1.81361
	13.2167	1.79249
	13.2333	1.69927
	13.25	1.55161
	13.2667	1.36071
	13.2833	1.14415
	13.3	0.92638
	13.3167	0.72
	13.3333	0.53689
	13.35	0.38727
	13.3667	0.2663
	13.3833	0.173
	13.4	0.10719
	13.4167	0.0563
	13.4333	0.01883
	13.45	-0.00605
	13.4667	-0.02218
	13.4833	-0.0339
	13.5	-0.04057
	13.5167	-0.04523
	13.5333	-0.04989
	13.55	-0.0538
	13.5667	-0.05497
	13.5833	-0.05791
	13.6	-0.06062
	13.6167	-0.06341
	13.6333	-0.06762
	13.65	-0.06882
	13.6667	-0.07095
	13.6833	-0.06832
	13.7	-0.06886
	13.7167	-0.07149
	13.7333	-0.07152
	13.75	-0.0703
	13.7667	-0.07217
	13.7833	-0.0741
	13.8	-0.07139
	13.8167	-0.07205
	13.8333	-0.07558
	13.85	-0.07314
	13.8667	-0.07444
	13.8833	-0.07519
	13.9	-0.07668
	13.9167	-0.08107
	13.9333	-0.08034
	13.95	-0.07925
	13.9667	-0.07995
	13.9833	-0.07945
	14	-0.07966
	14.0167	-0.08092
	14.0333	-0.08253
	14.05	-0.08366
	14.0667	-0.08543
	14.0833	-0.08584
	14.1	-0.08425
	14.1167	-0.08236
	14.1333	-0.08275
	14.15	-0.082
	14.1667	-0.08729
	14.1833	-0.08902
	14.2	-0.08822
	14.2167	-0.0887
	14.2333	-0.08209
	14.25	-0.07109
	14.2667	-0.06224
	14.2833	-0.03752
	14.3	-0.000554323
	14.3167	0.05548
	14.3333	0.13645
	14.35	0.25349
	14.3667	0.40442
	14.3833	0.59242
	14.4	0.81463
	14.4167	1.06315
	14.4333	1.32603
	14.45	1.5863
	14.4667	1.82399
	14.4833	2.01588
	14.5	2.14974
	14.5167	2.20219
	14.5333	2.17857
	14.55	2.07927
	14.5667	1.91518
	14.5833	1.70361
	14.6	1.46699
	14.6167	1.22459
	14.6333	0.9858
	14.65	0.76615
	14.6667	0.5755
	14.6833	0.41825
	14.7	0.2869
	14.7167	0.18648
	14.7333	0.11126
	14.75	0.05861
	14.7667	0.02231
	14.7833	-0.00636
	14.8	-0.02386
	14.8167	-0.03709
	14.8333	-0.04548
	14.85	-0.05539
	14.8667	-0.06096
	14.8833	-0.06849
	14.9	-0.07098
	14.9167	-0.07648
	14.9333	-0.07637
	14.95	-0.07614
	14.9667	-0.07859
	14.9833	-0.08148
	15	-0.0796
	15.0167	-0.08266
	15.0333	-0.08433
	15.05	-0.08231
	15.0667	-0.08285
	15.0833	-0.08519
	15.1	-0.08872
	15.1167	-0.08966
	15.1333	-0.08885
	15.15	-0.09012
	15.1667	-0.08957
	15.1833	-0.09042
	15.2	-0.09367
	15.2167	-0.09429
	15.2333	-0.09598
	15.25	-0.09868
	15.2667	-0.09986
	15.2833	-0.0985
	15.3	-0.10219
	15.3167	-0.09893
	15.3333	-0.09918
	15.35	-0.09774
	15.3667	-0.10042
	15.3833	-0.10243
	15.4	-0.10258
	15.4167	-0.10048
	15.4333	-0.10057
	15.45	-0.10104
	15.4667	-0.10311
	15.4833	-0.101
	15.5	-0.10092
	15.5167	-0.09984
	15.5333	-0.10185
	15.55	-0.10363
	15.5667	-0.10362
	15.5833	-0.1045
	15.6	-0.10627
	15.6167	-0.10493
	15.6333	-0.10552
	15.65	-0.10741
	15.6667	-0.10642
	15.6833	-0.10479
	15.7	-0.1082
	15.7167	-0.11057
	15.7333	-0.10997
	15.75	-0.11186
	15.7667	-0.11203
	15.7833	-0.11265
	15.8	-0.11266
	15.8167	-0.11454
	15.8333	-0.11372
	15.85	-0.11263
	15.8667	-0.10943
	15.8833	-0.11036
	15.9	-0.11075
	15.9167	-0.11338
	15.9333	-0.11203
	15.95	-0.11388
	15.9667	-0.1149
	15.9833	-0.1156
	16	-0.11562
	16.0167	-0.11349
	16.0333	-0.11042
	16.05	-0.11415
	16.0667	-0.11585
	16.0833	-0.11531
	16.1	-0.114
	16.1167	-0.1159
	16.1333	-0.11753
	16.15	-0.11717
	16.1667	-0.11695
	16.1833	-0.11166
	16.2	-0.11272
	16.2167	-0.11605
	16.2333	-0.1155
	16.25	-0.11527
	16.2667	-0.11891
	16.2833	-0.11946
	16.3	-0.11587
	16.3167	-0.1149
	16.3333	-0.11573
	16.35	-0.11607
	16.3667	-0.11678
	16.3833	-0.11557
	16.4	-0.11456
	16.4167	-0.11705
	16.4333	-0.11572
	16.45	-0.11946
	16.4667	-0.11702
	16.4833	-0.11879
	16.5	-0.11713
	16.5167	-0.11721
	16.5333	-0.11639
	16.55	-0.11732
	16.5667	-0.11814
	16.5833	-0.12027
	16.6	-0.12148
	16.6167	-0.12184
	16.6333	-0.12063
	16.65	-0.11799
	16.6667	-0.11851
	16.6833	-0.11712
	16.7	-0.11533
	16.7167	-0.11798
	16.7333	-0.12067
	16.75	-0.12389
	16.7667	-0.12524
	16.7833	-0.12194
	16.8	-0.12351
	16.8167	-0.12221
	16.8333	-0.12462
	16.85	-0.12363
	16.8667	-0.12481
	16.8833	-0.1267
	16.9	-0.12647
	16.9167	-0.12373
	16.9333	-0.1264
	16.95	-0.12701
	16.9667	-0.12817
	16.9833	-0.13032
	17	-0.1267
	17.0167	-0.12641
	17.0333	-0.12676
	17.05	-0.12489
	17.0667	-0.12586
	17.0833	-0.12417
	17.1	-0.12605
	17.1167	-0.12574
	17.1333	-0.12348
	17.15	-0.12462
	17.1667	-0.1258
	17.1833	-0.12452
	17.2	-0.12458
	17.2167	-0.12417
	17.2333	-0.12583
	17.25	-0.12519
	17.2667	-0.12697
	17.2833	-0.12619
	17.3	-0.12558
	17.3167	-0.12617
	17.3333	-0.12603
	17.35	-0.12533
	17.3667	-0.12637
	17.3833	-0.12602
	17.4	-0.12459
	17.4167	-0.12601
	17.4333	-0.12634
	17.45	-0.12441
	17.4667	-0.12348
	17.4833	-0.12157
	17.5	-0.0796
	17.5167	-0.08266
	17.5333	-0.08433
	17.55	-0.08231
	17.5667	-0.08285
	17.5833	-0.08519
	17.6	-0.08872
	17.6167	-0.08966
	17.6333	-0.08885
	17.65	-0.09012
	17.6667	-0.08957
	17.6833	-0.09042
	17.7	-0.09367
	17.7167	-0.09429
	17.7333	-0.09598
	17.75	-0.09868
	17.7667	-0.09986
	17.7833	-0.0985
	17.8	-0.10219
	17.8167	-0.09893
	17.8333	-0.09918
	17.85	-0.09774
	17.8667	-0.10042
	17.8833	-0.10243
	17.9	-0.10258
	17.9167	-0.10048
	17.9333	-0.10057
	17.95	-0.10104
	17.9667	-0.10311
	17.9833	-0.101
	18	-0.10092
	18.0167	-0.09984
	18.0333	-0.10185
	18.05	-0.10363
	18.0667	-0.10362
	18.0833	-0.1045
	18.1	-0.10627
	18.1167	-0.10493
	18.1333	-0.10552
	18.15	-0.10741
	18.1667	-0.10642
	18.1833	-0.10479
	18.2	-0.1082
	18.2167	-0.11057
	18.2333	-0.10997
	18.25	-0.11186
	18.2667	-0.11203
	18.2833	-0.11265
	18.3	-0.11266
	18.3167	-0.11454
	18.3333	-0.11372
	18.35	-0.11263
	18.3667	-0.10943
	18.3833	-0.11036
	18.4	-0.11075
	18.4167	-0.11338
	18.4333	-0.11203
	18.45	-0.11388
	18.4667	-0.1149
	18.4833	-0.1156
	18.5	-0.11562
	18.5167	-0.11349
	18.5333	-0.11042
	18.55	-0.11415
	18.5667	-0.11585
	18.5833	-0.11531
	18.6	-0.114
	18.6167	-0.1159
	18.6333	-0.11753
	18.65	-0.11717
	18.6667	-0.11695
	18.6833	-0.11166
	18.7	-0.11272
	18.7167	-0.11605
	18.7333	-0.1155
	18.75	-0.11527
	18.7667	-0.11891
	18.7833	-0.11946
	18.8	-0.11587
	18.8167	-0.1149
	18.8333	-0.11573
	18.85	-0.11607
	18.8667	-0.11678
	18.8833	-0.11557
	18.9	-0.11456
	18.9167	-0.11705
	18.9333	-0.11572
	18.95	-0.11946
	18.9667	-0.11702
	18.9833	-0.11879
	19	-0.11713
	19.0167	-0.11721
	19.0333	-0.11639
	19.05	-0.11732
	19.0667	-0.11814
	19.0833	-0.12027
	19.1	-0.12148
	19.1167	-0.12184
	19.1333	-0.12063
	19.15	-0.11799
	19.1667	-0.11851
	19.1833	-0.11712
	19.2	-0.11533
	19.2167	-0.11798
	19.2333	-0.12067
	19.25	-0.12389
	19.2667	-0.12524
	19.2833	-0.12194
	19.3	-0.12351
	19.3167	-0.12221
	19.3333	-0.12462
	19.35	-0.12363
	19.3667	-0.12481
	19.3833	-0.1267
	19.4	-0.12647
	19.4167	-0.12373
	19.4333	-0.1264
	19.45	-0.12701
	19.4667	-0.12817
	19.4833	-0.13032
	19.5	-0.1267
	19.5167	-0.12641
	19.5333	-0.12676
	19.55	-0.12489
	19.5667	-0.12586
	19.5833	-0.12417
	19.6	-0.12605
	19.6167	-0.12574
	19.6333	-0.12348
	19.65	-0.12462
	19.6667	-0.1258
	19.6833	-0.12452
	19.7	-0.12458
	19.7167	-0.12417
	19.7333	-0.12583
	19.75	-0.12519
	19.7667	-0.12697
	19.7833	-0.12619
	19.8	-0.12558
	19.8167	-0.12617
	19.8333	-0.12603
	19.85	-0.12533
	19.8667	-0.12637
	19.8833	-0.12602
	19.9	-0.12459
	19.9167	-0.12601
	19.9333	-0.12634
	19.95	-0.12441
	19.9667	-0.12348
	19.9833	-0.12157
	20	-0.12292
	20.0167	-0.12468
	20.0333	-0.12316
	20.05	-0.12558
	20.0667	-0.12447
	20.0833	-0.1217
	20.1	-0.1243
	20.1167	-0.12182
	20.1333	-0.12419
	20.15	-0.12532
	20.1667	-0.12371
	20.1833	-0.12426
	20.2	-0.1238
	20.2167	-0.12355
	20.2333	-0.12547
	20.25	-0.12636
	20.2667	-0.12685
	20.2833	-0.12449
	20.3	-0.12521
	20.3167	-0.12587
	20.3333	-0.12567
	20.35	-0.12455
	20.3667	-0.12728
	20.3833	-0.12716
	20.4	-0.12556
	20.4167	-0.12396
	20.4333	-0.12353
	20.45	-0.12605
	20.4667	-0.1222
	20.4833	-0.12
	20.5	-0.12199
	20.5167	-0.12432
	20.5333	-0.12572
	20.55	-0.12804
	20.5667	-0.12762
	20.5833	-0.12552
	20.6	-0.12913
	20.6167	-0.12656
	20.6333	-0.12723
	20.65	-0.12768
	20.6667	-0.12555
	20.6833	-0.1235
	20.7	-0.12409
	20.7167	-0.12396
	20.7333	-0.12261
	20.75	-0.12228
	20.7667	-0.12222
	20.7833	-0.12482
	20.8	-0.12628
	20.8167	-0.12717
	20.8333	-0.12649
	20.85	-0.12582
	20.8667	-0.12447
	20.8833	-0.12542
	20.9	-0.12175
	20.9167	-0.12344
	20.9333	-0.12189
	20.95	-0.12066
	20.9667	-0.12143
	20.9833	-0.12231
	21	-0.11941
	21.0167	-0.1197
	21.0333	-0.11987
	21.05	-0.11992
	21.0667	-0.11851
	21.0833	-0.11846
	21.1	-0.11822
	21.1167	-0.1186
	21.1333	-0.11865
	21.15	-0.11872
	21.1667	-0.1185
	21.1833	-0.11799
	21.2	-0.11846
	21.2167	-0.11759
	21.2333	-0.11861
	21.25	-0.11894
	21.2667	-0.1195
	21.2833	-0.11983
	21.3	-0.12071
	21.3167	-0.11957
	21.3333	-0.12173
	21.35	-0.1201
	21.3667	-0.1179
	21.3833	-0.11746
	21.4	-0.11894
	21.4167	-0.12114
	21.4333	-0.12136
	21.45	-0.12055
	21.4667	-0.12023
	21.4833	-0.12309
	21.5	-0.1252
	21.5167	-0.12317
	21.5333	-0.12526
	21.55	-0.12401
	21.5667	-0.12197
	21.5833	-0.11918
	21.6	-0.12334
	21.6167	-0.12381
	21.6333	-0.11781
	21.65	-0.11588
	21.6667	-0.11829
	21.6833	-0.12084
	21.7	-0.11953
	21.7167	-0.11897
	21.7333	-0.11785
	21.75	-0.11949
	21.7667	-0.12001
	21.7833	-0.11819
	21.8	-0.11847
	21.8167	-0.11903
	21.8333	-0.11918
	21.85	-0.11902
	21.8667	-0.12124
	21.8833	-0.1203
	21.9	-0.11873
	21.9167	-0.1171
	21.9333	-0.11889
	21.95	-0.11882
	21.9667	-0.11766
	21.9833	-0.11764
	22	-0.11468
	22.0167	-0.11376
	22.0333	-0.11821
	22.05	-0.12219
	22.0667	-0.12149
	22.0833	-0.11644
	22.1	-0.11732
	22.1167	-0.11779
	22.1333	-0.11704
	22.15	-0.11821
	22.1667	-0.12022
	22.1833	-0.11808
	22.2	-0.11837
	22.2167	-0.11931
	22.2333	-0.12007
	22.25	-0.11945
	22.2667	-0.1188
	22.2833	-0.11472
	22.3	-0.11662
	22.3167	-0.11729
	22.3333	-0.11705
	22.35	-0.12023
	22.3667	-0.12003
	22.3833	-0.12068
	22.4	-0.12248
	22.4167	-0.12372
	22.4333	-0.12201
	22.45	-0.11847
	22.4667	-0.12146
	22.4833	-0.11931
	22.5	-0.121
	22.5167	-0.12338
	22.5333	-0.12479
	22.55	-0.12268
	22.5667	-0.1221
	22.5833	-0.12238
	22.6	-0.12033
	22.6167	-0.11714
	22.6333	-0.11944
	22.65	-0.11884
	22.6667	-0.1182
	22.6833	-0.12173
	22.7	-0.12193
	22.7167	-0.12053
	22.7333	-0.12052
	22.75	-0.11858
	22.7667	-0.11499
	22.7833	-0.11791
	22.8	-0.11705
	22.8167	-0.1174
	22.8333	-0.12063
	22.85	-0.11951
	22.8667	-0.1173
	22.8833	-0.11748
	22.9	-0.11959
	22.9167	-0.12071
	22.9333	-0.11933
	22.95	-0.11813
	22.9667	-0.11884
	22.9833	-0.11721
	23	-0.11744
	23.0167	-0.11703
	23.0333	-0.11487
	23.05	-0.11596
	23.0667	-0.11413
	23.0833	-0.11003
	23.1	-0.11251
	23.1167	-0.11528
	23.1333	-0.11483
	23.15	-0.11485
	23.1667	-0.11485
	23.1833	-0.11539
	23.2	-0.11621
	23.2167	-0.11452
	23.2333	-0.1169
	23.25	-0.11606
	23.2667	-0.11702
	23.2833	-0.11844
	23.3	-0.11716
	23.3167	-0.1161
	23.3333	-0.11613
	23.35	-0.11996
	23.3667	-0.12273
	23.3833	-0.12055
	23.4	-0.11841
	23.4167	-0.11778
	23.4333	-0.11782
	23.45	-0.11854
	23.4667	-0.11789
	23.4833	-0.12016
	23.5	-0.11934
	23.5167	-0.11844
	23.5333	-0.11935
	23.55	-0.11907
	23.5667	-0.11657
	23.5833	-0.11467
	23.6	-0.11698
	23.6167	-0.11803
	23.6333	-0.11883
	23.65	-0.11748
	23.6667	-0.11743
	23.6833	-0.11287
	23.7	-0.11537
	23.7167	-0.11854
	23.7333	-0.11509
	23.75	-0.11567
	23.7667	-0.11613
	23.7833	-0.11529
	23.8	-0.11652
	23.8167	-0.11825
	23.8333	-0.11626
	23.85	-0.11515
	23.8667	-0.11688
	23.8833	-0.11533
	23.9	-0.11584
	23.9167	-0.11616
	23.9333	-0.1165
	23.95	-0.11504
	23.9667	-0.11276
	23.9833	-0.11223
	24	-0.11272
	24.0167	-0.11313
	24.0333	-0.11336
	24.05	-0.11487
	24.0667	-0.11594
	24.0833	-0.11299
	24.1	-0.11166
	24.1167	-0.11577
	24.1333	-0.11604
	24.15	-0.11442
	24.1667	-0.11359
	24.1833	-0.11297
	24.2	-0.11219
	24.2167	-0.11121
	24.2333	-0.1099
	24.25	-0.11168
	24.2667	-0.11324
	24.2833	-0.11335
	24.3	-0.11684
	24.3167	-0.11287
	24.3333	-0.11231
	24.35	-0.11128
	24.3667	-0.11258
	24.3833	-0.11286
	24.4	-0.11259
	24.4167	-0.11401
	24.4333	-0.115
	24.45	-0.11651
	24.4667	-0.11519
	24.4833	-0.1163
	24.5	-0.11669
	24.5167	-0.1158
	24.5333	-0.11397
	24.55	-0.11545
	24.5667	-0.11698
	24.5833	-0.11649
	24.6	-0.11691
	24.6167	-0.1148
	24.6333	-0.11666
	24.65	-0.11857
	24.6667	-0.11974
	24.6833	-0.12075
	24.7	-0.11852
	24.7167	-0.11634
	24.7333	-0.11099
	24.75	-0.11069
	24.7667	-0.11
	24.7833	-0.11206
	24.8	-0.11317
	24.8167	-0.1139
	24.8333	-0.11612
	24.85	-0.11258
	24.8667	-0.11319
	24.8833	-0.11129
	24.9	-0.11095
	24.9167	-0.11193
	24.9333	-0.11338
	24.95	-0.11341
	24.9667	-0.11532
	24.9833	-0.11383
	25	-0.11338
	25.0167	-0.11428
	25.0333	-0.11308
	25.05	-0.1147
	25.0667	-0.11535
	25.0833	-0.11354
	25.1	-0.1136
	25.1167	-0.11385
	25.1333	-0.1146
	25.15	-0.11489
	25.1667	-0.11255
	25.1833	-0.11404
	25.2	-0.11019
	25.2167	-0.10929
	25.2333	-0.11075
	25.25	-0.11281
	25.2667	-0.11111
	25.2833	-0.1079
	25.3	-0.11089
	25.3167	-0.10873
	25.3333	-0.11238
	25.35	-0.11319
	25.3667	-0.11323
	25.3833	-0.11154
	25.4	-0.11135
	25.4167	-0.11126
	25.4333	-0.11214
	25.45	-0.10998
	25.4667	-0.1076
	25.4833	-0.1081
	25.5	-0.11052
	25.5167	-0.11098
	25.5333	-0.10933
	25.55	-0.11038
	25.5667	-0.11261
	25.5833	-0.11258
	25.6	-0.11187
	25.6167	-0.11331
	25.6333	-0.11264
	25.65	-0.10716
	25.6667	-0.10678
	25.6833	-0.10808
	25.7	-0.1092
	25.7167	-0.10924
	25.7333	-0.11334
	25.75	-0.11267
	25.7667	-0.11241
	25.7833	-0.1128
	25.8	-0.1158
	25.8167	-0.1149
	25.8333	-0.11324
	25.85	-0.11485
	25.8667	-0.11452
	25.8833	-0.1143
	25.9	-0.11743
	25.9167	-0.11348
	25.9333	-0.11072
	25.95	-0.11201
	25.9667	-0.1135
	25.9833	-0.1149
	26	-0.11393
	26.0167	-0.11518
	26.0333	-0.1135
	26.05	-0.11308
	26.0667	-0.11314
	26.0833	-0.11548
	26.1	-0.11609
	26.1167	-0.1147
	26.1333	-0.11018
	26.15	-0.10968
	26.1667	-0.11296
	26.1833	-0.11292
	26.2	-0.11243
	26.2167	-0.11029
	26.2333	-0.10886
	26.25	-0.10993
	26.2667	-0.11001
	26.2833	-0.10744
	26.3	-0.1111
	26.3167	-0.11045
	26.3333	-0.10976
	26.35	-0.11119
	26.3667	-0.11002
	26.3833	-0.10905
	26.4	-0.10982
	26.4167	-0.10446
	26.4333	-0.10626
	26.45	-0.1062
	26.4667	-0.10782
	26.4833	-0.10685
	26.5	-0.1084
	26.5167	-0.1063
	26.5333	-0.10533
	26.55	-0.1073
	26.5667	-0.10839
	26.5833	-0.10644
	26.6	-0.10846
	26.6167	-0.10792
	26.6333	-0.1099
	26.65	-0.10972
	26.6667	-0.11168
	26.6833	-0.11235
	26.7	-0.11077
	26.7167	-0.11206
	26.7333	-0.11344
	26.75	-0.11181
	26.7667	-0.11148
	26.7833	-0.11257
	26.8	-0.11141
	26.8167	-0.11104
	26.8333	-0.11151
	26.85	-0.11173
	26.8667	-0.11201
	26.8833	-0.11395
	26.9	-0.11227
	26.9167	-0.10858
	26.9333	-0.11051
	26.95	-0.11192
	26.9667	-0.1112
	26.9833	-0.10674
	27	-0.1064
	27.0167	-0.10704
	27.0333	-0.10604
	27.05	-0.10857
	27.0667	-0.10732
	27.0833	-0.10859
	27.1	-0.11014
	27.1167	-0.10905
	27.1333	-0.10933
	27.15	-0.10824
	27.1667	-0.10878
	27.1833	-0.10605
	27.2	-0.1049
	27.2167	-0.10775
	27.2333	-0.10795
	27.25	-0.10813
	27.2667	-0.10716
	27.2833	-0.10903
	27.3	-0.11281
	27.3167	-0.11094
	27.3333	-0.11073
	27.35	-0.10959
	27.3667	-0.10673
	27.3833	-0.10728
	27.4	-0.10685
	27.4167	-0.10697
	27.4333	-0.10612
	27.45	-0.10941
	27.4667	-0.1093
	27.4833	-0.10783
	27.5	-0.11028
	27.5167	-0.10926
	27.5333	-0.10556
	27.55	-0.10595
	27.5667	-0.10813
	27.5833	-0.10741
	27.6	-0.10827
	27.6167	-0.1118
	27.6333	-0.11016
	27.65	-0.11127
	27.6667	-0.11068
	27.6833	-0.10726
	27.7	-0.10657
	27.7167	-0.10508
	27.7333	-0.10778
	27.75	-0.10847
	27.7667	-0.1066
	27.7833	-0.10539
	27.8	-0.10742
	27.8167	-0.10837
	27.8333	-0.10911
	27.85	-0.10839
	27.8667	-0.10862
	27.8833	-0.10693
	27.9	-0.10767
	27.9167	-0.10725
	27.9333	-0.10574
	27.95	-0.10535
	27.9667	-0.10568
	27.9833	-0.10642
	28	-0.10817
	28.0167	-0.10826
	28.0333	-0.112
	28.05	-0.11184
	28.0667	-0.10775
	28.0833	-0.10784
	28.1	-0.10983
	28.1167	-0.11224
	28.1333	-0.1108
	28.15	-0.10756
	28.1667	-0.10399
	28.1833	-0.10298
	28.2	-0.10357
	28.2167	-0.1034
	28.2333	-0.10591
	28.25	-0.10486
	28.2667	-0.10404
	28.2833	-0.10181
	28.3	-0.10211
	28.3167	-0.10071
	28.3333	-0.10206
	28.35	-0.09768
	28.3667	-0.09823
	28.3833	-0.10138
	28.4	-0.10469
	28.4167	-0.10196
	28.4333	-0.10275
	28.45	-0.10416
	28.4667	-0.10227
	28.4833	-0.10205
	28.5	-0.10402
	28.5167	-0.10258
	28.5333	-0.10381
	28.55	-0.1057
	28.5667	-0.10575
	28.5833	-0.10467
	28.6	-0.10147
	28.6167	-0.10082
	28.6333	-0.10165
	28.65	-0.10335
	28.6667	-0.10384
	28.6833	-0.10261
	28.7	-0.10263
	28.7167	-0.0994
	28.7333	-0.10057
	28.75	-0.10159
	28.7667	-0.10184
	28.7833	-0.10111
	28.8	-0.0986
	28.8167	-0.09959
	28.8333	-0.1005
	28.85	-0.09726
	28.8667	-0.09704
	28.8833	-0.09709
	28.9	-0.09729
	28.9167	-0.09932
	28.9333	-0.10299
	28.95	-0.10184
	28.9667	-0.0986
	28.9833	-0.10171
	29	-0.10152
	29.0167	-0.10274
	29.0333	-0.10269
	29.05	-0.10224
	29.0667	-0.10158
	29.0833	-0.10088
	29.1	-0.10112
	29.1167	-0.10488
	29.1333	-0.09978
	29.15	-0.09999
	29.1667	-0.10082
	29.1833	-0.10034
	29.2	-0.10181
	29.2167	-0.10053
	29.2333	-0.10083
	29.25	-0.10338
	29.2667	-0.10363
	29.2833	-0.10517
	29.3	-0.10415
	29.3167	-0.10352
	29.3333	-0.09911
	29.35	-0.09684
	29.3667	-0.09952
	29.3833	-0.09999
	29.4	-0.09877
	29.4167	-0.09916
	29.4333	-0.10069
	29.45	-0.09996
	29.4667	-0.10221
	29.4833	-0.10021
	29.5	-0.10067
	29.5167	-0.10334
	29.5333	-0.10453
	29.55	-0.10326
	29.5667	-0.10167
	29.5833	-0.09922
	29.6	-0.09955
	29.6167	-0.0981
	29.6333	-0.09888
	29.65	-0.10213
	29.6667	-0.09903
	29.6833	-0.09806
	29.7	-0.09894
	29.7167	-0.10089
	29.7333	-0.10013
	29.75	-0.10062
	29.7667	-0.09755
	29.7833	-0.09498
	29.8	-0.09664
	29.8167	-0.0992
	29.8333	-0.09949
	29.85	-0.09917
	29.8667	-0.09902
	29.8833	-0.09886
	29.9	-0.09902
	29.9167	-0.09841
	29.9333	-0.09515
	29.95	-0.09816
	29.9667	-0.09727
	29.9833	-0.09869
	30	-0.09829
	0	0
	0	0
	0	0
	0	0
	0	0
	0	0
	0	0
	0	0
	0	0
	0	0
	0	0
	0	0
	0	0
	0	0
	0	0
	0	0
	0	0
	0	0
	0	0
	0	0
	0	0
	0	0
	0	0
	0	0
	0	0
	0	0
	0	0
	0	0
	0	0

## Sheet: Sheet7
	0.01667	-0.00304
	0.03333	-0.00494
	0.05	0.00025779
	0.06667	0.00124
	0.08333	0.00063777
	0.1	-0.00337
	0.11667	-0.00414		Chromatogram 3
	0.13333	-0.00218
	0.15	-0.00214
	0.16667	8.19564e-05
	0.18333	0.00248
	0.2	0.000481308
	0.21667	-0.00398
	0.23333	-0.00484
	0.25	-0.00287
	0.26667	-0.00268
	0.28333	-0.00344
	0.3	-0.00287
	0.31667	-5.36442e-05
	0.33333	0.0005126
	0.35	-0.00195
	0.36667	-0.00473
	0.38333	-0.00267
	0.4	0.00144
	0.41667	0.00162
	0.43333	0.0011
	0.45	-0.0011
	0.46667	-3.12924e-05
	0.48333	0.000655651
	0.5	0.00116
	0.51667	0.000204146
	0.53333	0.00261
	0.55	0.00192
	0.56667	0.000858307
	0.58333	0.00293
	0.6	0.0013
	0.61667	0.000566244
	0.63333	-0.000417233
	0.65	-0.00152
	0.66667	-0.000321865
	0.68333	-0.000856817
	0.7	-0.00257
	0.71667	-0.00221
	0.73333	-0.00231
	0.75	-0.00181
	0.76667	-2.98023e-05
	0.78333	0.00051707
	0.8	0.000990927
	0.81667	0.00228
	0.83333	0.00232
	0.85	0.000192225
	0.86667	0.00561
	0.88333	0.00177
	0.9	-0.000724196
	0.91667	-0.000657141
	0.93333	0.00318
	0.95	0.00537
	0.96667	0.00449
	0.98333	0.00568
	1	0.00503
	1.01667	-0.000996888
	1.03333	-0.000473857
	1.05	0.00552
	1.06667	0.00422
	1.08333	0.00368
	1.1	0.00188
	1.11667	0.00307
	1.13333	0.00295
	1.15	0.00497
	1.16667	0.00405
	1.18333	0.0018
	1.2	-0.00121
	1.21667	-0.00354
	1.23333	-0.00327
	1.25	-0.00258
	1.26667	-0.00186
	1.28333	-0.00176
	1.3	-0.000430644
	1.31667	0.00132
	1.33333	0.00213
	1.35	0.00141
	1.36667	0.00243
	1.38333	0.000542402
	1.4	0.003
	1.41667	0.00485
	1.43333	0.00356
	1.45	0.00628
	1.46667	0.00863
	1.48333	0.01002
	1.5	0.01187
	1.51667	0.0166
	1.53333	0.01341
	1.55	0.01547
	1.56667	0.0136
	1.58333	0.01618
	1.6	0.01664
	1.61667	0.01564
	1.63333	0.01317
	1.65	0.01345
	1.66667	0.00897
	1.68333	0.00628
	1.7	0.00498
	1.71667	0.00529
	1.73333	0.00504
	1.75	0.00514
	1.76667	0.00215
	1.78333	0.00112
	1.8	0.000961125
	1.81667	-0.00194
	1.83333	0.00133
	1.85	-0.000528991
	1.86667	-0.00279
	1.88333	-0.00214
	1.9	-0.0011
	1.91667	-0.00395
	1.93333	-0.00229
	1.95	-0.00387
	1.96667	-0.00194
	1.98333	-0.000661612
	2	-0.00165
	2.01667	-0.00268
	2.03333	-0.0061
	2.05	-0.00342
	2.06667	-0.00409
	2.08333	-0.00398
	2.1	-0.00288
	2.11667	-0.00486
	2.13333	-0.00277
	2.15	-0.00297
	2.16667	-0.00362
	2.18333	-0.00403
	2.2	-0.0032
	2.21667	-0.00215
	2.23333	-0.000609457
	2.25	-0.000190735
	2.26667	-0.00137
	2.28333	-0.00446
	2.3	-0.00517
	2.31667	-0.00381
	2.33333	0.0013
	2.35	0.00308
	2.36667	0.0018
	2.38333	-0.00178
	2.4	-0.00139
	2.41667	-0.003
	2.43333	-0.000935793
	2.45	-0.00618
	2.46667	-0.00532
	2.48333	-0.00442
	2.5	-0.00312
	2.51667	-0.00402
	2.53333	-0.00318
	2.55	-0.00204
	2.56667	-0.00258
	2.58333	-0.00438
	2.6	-0.0048
	2.61667	-0.0085
	2.63333	-0.00791
	2.65	-0.00404
	2.66667	-0.00147
	2.68333	-0.000947714
	2.7	-0.00508
	2.71667	-0.00638
	2.73333	-0.00171
	2.75	-0.00369
	2.76667	-0.00476
	2.78333	-0.00419
	2.8	-0.00482
	2.81667	-0.00538
	2.83333	-0.00609
	2.85	-0.00657
	2.86667	-0.00611
	2.88333	-0.00699
	2.9	-0.00644
	2.91667	-0.00667
	2.93333	-0.00698
	2.95	0.000101328
	2.96667	-0.00114
	2.98333	-0.00311
	3	-0.00206
	3.01667	-0.000727177
	3.03333	-0.00403
	3.05	-0.01123
	3.06667	-0.01026
	3.08333	-0.00739
	3.1	-0.00759
	3.11667	-0.00514
	3.13333	-0.00418
	3.15	-0.00508
	3.16667	-0.00847
	3.18333	-0.00999
	3.2	-0.00848
	3.21667	-0.00343
	3.23333	-0.00577
	3.25	-0.00511
	3.26667	-0.00473
	3.28333	-0.00491
	3.3	-0.00905
	3.31667	-0.00933
	3.33333	-0.00873
	3.35	-0.00707
	3.36667	-0.00724
	3.38333	-0.00631
	3.4	-0.00719
	3.41667	-0.00647
	3.43333	-0.00305
	3.45	-0.00224
	3.46667	-0.000964105
	3.48333	-0.00247
	3.5	-0.00171
	3.51667	-0.00392
	3.53333	-0.00517
	3.55	-0.0055
	3.56667	-0.00655
	3.58333	-0.00633
	3.6	-0.00254
	3.61667	-0.0029
	3.63333	-0.00376
	3.65	-0.00872
	3.66667	-0.00713
	3.68333	-0.00796
	3.7	-0.00716
	3.71667	-0.00652
	3.73333	-0.00655
	3.75	-0.00544
	3.76667	-0.00528
	3.78333	-0.00437
	3.8	-0.00607
	3.81667	-0.00582
	3.83333	-0.00281
	3.85	-0.00296
	3.86667	-0.00611
	3.88333	-0.00572
	3.9	-0.00553
	3.91667	-0.00657
	3.93333	-0.007
	3.95	-0.00658
	3.96667	-0.00825
	3.98333	-0.00789
	4	-0.00892
	4.01667	-0.01161
	4.03333	-0.00835
	4.05	-0.00575
	4.06667	-0.00836
	4.08333	-0.00803
	4.1	-0.01009
	4.11667	-0.00823
	4.13333	-0.00644
	4.15	-0.0041
	4.16667	-0.00657
	4.18333	-0.00693
	4.2	-0.00838
	4.21667	-0.00934
	4.23333	-0.00671
	4.25	-0.00637
	4.26667	-0.00476
	4.28333	-0.00504
	4.3	-0.00704
	4.31667	-0.00596
	4.33333	-0.00296
	4.35	-0.00251
	4.36667	-0.00468
	4.38333	-0.00269
	4.4	-0.00222
	4.41667	-0.00417
	4.43333	-0.00611
	4.45	-0.00899
	4.46667	-0.01012
	4.48333	-0.00838
	4.5	-0.00742
	4.51667	-0.00927
	4.53333	-0.00862
	4.55	-0.01022
	4.56667	-0.0096
	4.58333	-0.01045
	4.6	-0.01404
	4.61667	-0.00864
	4.63333	-0.00831
	4.65	-0.00704
	4.66667	-0.00592
	4.68333	-0.00651
	4.7	-0.007
	4.71667	-0.00784
	4.73333	-0.00947
	4.75	-0.01037
	4.76667	-0.00567
	4.78333	-0.00219
	4.8	-0.00763
	4.81667	-0.00932
	4.83333	-0.00806
	4.85	-0.00661
	4.86667	-0.00878
	4.88333	-0.00796
	4.9	-0.00387
	4.91667	-0.00218
	4.93333	-0.0025
	4.95	-0.00354
	4.96667	-0.00508
	4.98333	-0.0073
	5	-0.00695
	5.01667	-0.00515
	5.03333	-0.00575
	5.05	-0.00814
	5.06667	-0.00834
	5.08333	-0.00701
	5.1	-0.00753
	5.11667	-0.00911
	5.13333	-0.01302
	5.15	-0.01267
	5.16667	-0.01173
	5.18333	-0.01043
	5.2	-0.01177
	5.21667	-0.0103
	5.23333	-0.01103
	5.25	-0.00945
	5.26667	-0.01148
	5.28333	-0.01199
	5.3	-0.00673
	5.31667	-0.00567
	5.33333	-0.00978
	5.35	-0.01104
	5.36667	-0.01249
	5.38333	-0.01375
	5.4	-0.01434
	5.41667	-0.01234
	5.43333	-0.01447
	5.45	-0.01704
	5.46667	-0.01364
	5.48333	-0.00971
	5.5	-0.01091
	5.51667	-0.01229
	5.53333	-0.01009
	5.55	-0.00865
	5.56667	-0.0093
	5.58333	-0.00998
	5.6	-0.01103
	5.61667	-0.01121
	5.63333	-0.0117
	5.65	-0.00973
	5.66667	-0.01026
	5.68333	-0.00718
	5.7	-0.00786
	5.71667	-0.01024
	5.73333	-0.01235
	5.75	-0.01533
	5.76667	-0.0137
	5.78333	-0.01335
	5.8	-0.01367
	5.81667	-0.0156
	5.83333	-0.01553
	5.85	-0.0116
	5.86667	-0.00716
	5.88333	-0.00994
	5.9	-0.01168
	5.91667	-0.01326
	5.93333	-0.01451
	5.95	-0.01341
	5.96667	-0.01302
	5.98333	-0.01284
	6	-0.01033
	6.01667	-0.0057
	6.03333	-0.01027
	6.05	-0.01268
	6.06667	-0.01321
	6.08333	-0.01375
	6.1	-0.01358
	6.11667	-0.01255
	6.13333	-0.01232
	6.15	-0.0122
	6.16667	-0.01225
	6.18333	-0.01501
	6.2	-0.02153
	6.21667	-0.01633
	6.23333	-0.0145
	6.25	-0.01244
	6.26667	-0.011
	6.28333	-0.01168
	6.3	-0.00992
	6.31667	0.02228
	6.33333	0.0228
	6.35	0.02366
	6.36667	0.02023
	6.38333	0.02096
	6.4	0.03188
	6.41667	0.0793
	6.43333	0.22049
	6.45	0.5348
	6.46667	1.02146
	6.48333	1.503
	6.5	1.73677
	6.51667	1.60812
	6.53333	1.22457
	6.55	0.80175
	6.56667	0.4711
	6.58333	0.2625
	6.6	0.15104
	6.61667	0.09103
	6.63333	0.06488
	6.65	0.05038
	6.66667	0.04229
	6.68333	0.03817
	6.7	0.0322
	6.71667	0.02887
	6.73333	0.02625
	6.75	0.0254
	6.76667	0.02343
	6.78333	0.02226
	6.8	0.02388
	6.81667	0.02875
	6.83333	0.02989
	6.85	0.02743
	6.86667	0.02766
	6.88333	0.02863
	6.9	0.03166
	6.91667	0.03597
	6.93333	0.0412
	6.95	0.04231
	6.96667	0.04828
	6.98333	0.05022
	7	0.04639
	7.01667	0.04529
	7.03333	0.04479
	7.05	0.04101
	7.06667	0.04077
	7.08333	0.03839
	7.1	0.03689
	7.11667	0.03258
	7.13333	0.03073
	7.15	0.02498
	7.16667	0.02615
	7.18333	0.02392
	7.2	0.02523
	7.21667	0.02675
	7.23333	0.02563
	7.25	0.02786
	7.26667	0.02571
	7.28333	0.02786
	7.3	0.02669
	7.31667	0.02676
	7.33333	0.03144
	7.35	0.05433
	7.36667	0.09692
	7.38333	0.20604
	7.4	0.38654
	7.41667	0.59964
	7.43333	0.76948
	7.45	0.8212
	7.46667	0.74614
	7.48333	0.57688
	7.5	0.39567
	7.51667	0.24745
	7.53333	0.14896
	7.55	0.09359
	7.56667	0.06727
	7.58333	0.06343
	7.6	0.09606
	7.61667	0.19066
	7.63333	0.38792
	7.65	0.67612
	7.66667	0.98883
	7.68333	1.21064
	7.7	1.25403
	7.71667	1.11026
	7.73333	0.85614
	7.75	0.59291
	7.76667	0.38176
	7.78333	0.24049
	7.8	0.15394
	7.81667	0.10718
	7.83333	0.08119
	7.85	0.06699
	7.86667	0.05495
	7.88333	0.04929
	7.9	0.04621
	7.91667	0.04227
	7.93333	0.03714
	7.95	0.03437
	7.96667	0.03099
	7.98333	0.02584
	8	0.02157
	8.01667	0.02456
	8.03333	0.0245
	8.05	0.02409
	8.06667	0.02295
	8.08333	0.0201
	8.1	0.02355
	8.11667	0.02417
	8.13333	0.02353
	8.15	0.02035
	8.16667	0.02163
	8.18333	0.01818
	8.2	0.01947
	8.21667	0.0202
	8.23333	0.02006
	8.25	0.02306
	8.26667	0.03089
	8.28333	0.03557
	8.3	0.03808
	8.31667	0.04314
	8.33333	0.0417
	8.35	0.04048
	8.36667	0.04088
	8.38333	0.04963
	8.4	0.07
	8.41667	0.12012
	8.43333	0.18043
	8.45	0.24821
	8.46667	0.30591
	8.48333	0.32434
	8.5	0.30315
	8.51667	0.25381
	8.53333	0.19365
	8.55	0.13267
	8.56667	0.09144
	8.58333	0.06166
	8.6	0.04659
	8.61667	0.03675
	8.63333	0.03129
	8.65	0.02764
	8.66667	0.02651
	8.68333	0.0242
	8.7	0.02307
	8.71667	0.02257
	8.73333	0.02582
	8.75	0.02529
	8.76667	0.02386
	8.78333	0.0233
	8.8	0.02301
	8.81667	0.02006
	8.83333	0.02047
	8.85	0.01877
	8.86667	0.01512
	8.88333	0.01711
	8.9	0.01908
	8.91667	0.01808
	8.93333	0.01407
	8.95	0.01604
	8.96667	0.01593
	8.98333	0.0166
	9	0.01194
	9.01667	0.01599
	9.03333	0.01286
	9.05	0.01564
	9.06667	0.0168
	9.08333	0.01726
	9.1	0.02565
	9.11667	0.03862
	9.13333	0.07476
	9.15	0.13148
	9.16667	0.22807
	9.18333	0.35933
	9.2	0.49861
	9.21667	0.60564
	9.23333	0.65193
	9.25	0.62067
	9.26667	0.52991
	9.28333	0.41029
	9.3	0.28999
	9.31667	0.18909
	9.33333	0.11921
	9.35	0.07474
	9.36667	0.04689
	9.38333	0.03223
	9.4	0.02514
	9.41667	0.02143
	9.43333	0.02149
	9.45	0.01784
	9.46667	0.01312
	9.48333	0.0176
	9.5	0.01666
	9.51667	0.01444
	9.53333	0.01366
	9.55	0.01257
	9.56667	0.01284
	9.58333	0.01151
	9.6	0.01241
	9.61667	0.01082
	9.63333	0.00942
	9.65	0.0098
	9.66667	0.01025
	9.68333	0.00881
	9.7	0.01217
	9.71667	0.01158
	9.73333	0.00854
	9.75	0.00911
	9.76667	0.00645
	9.78333	0.00431
	9.8	0.00368
	9.81667	0.00723
	9.83333	0.00676
	9.85	0.00716
	9.86667	0.00812
	9.88333	0.01033
	9.9	0.00895
	9.91667	0.01087
	9.93333	0.01165
	9.95	0.01027
	9.96667	0.00849
	9.98333	0.00814
	10	0.00688
	10.0167	0.00956
	10.0333	0.00873
	10.05	0.00649
	10.0667	0.00545
	10.0833	0.00921
	10.1	0.00867
	10.1167	0.00528
	10.1333	0.00747
	10.15	0.00547
	10.1667	0.00497
	10.1833	0.00479
	10.2	0.00593
	10.2167	0.00632
	10.2333	0.00427
	10.25	0.00447
	10.2667	0.00785
	10.2833	0.00654
	10.3	0.00626
	10.3167	0.00486
	10.3333	0.00678
	10.35	0.00592
	10.3667	0.0074
	10.3833	0.00668
	10.4	0.00591
	10.4167	0.00401
	10.4333	0.00367
	10.45	0.00257
	10.4667	0.00471
	10.4833	0.00769
	10.5	0.00924
	10.5167	0.00979
	10.5333	0.00495
	10.55	0.00609
	10.5667	0.00579
	10.5833	0.00702
	10.6	0.00792
	10.6167	0.006
	10.6333	0.00659
	10.65	0.00647
	10.6667	0.00717
	10.6833	0.00539
	10.7	0.0047
	10.7167	0.00402
	10.7333	0.0051
	10.75	0.00672
	10.7667	0.00623
	10.7833	0.00708
	10.8	0.00758
	10.8167	0.00585
	10.8333	0.00603
	10.85	0.00928
	10.8667	0.00812
	10.8833	0.00768
	10.9	0.00906
	10.9167	0.00896
	10.9333	0.00752
	10.95	0.00944
	10.9667	0.00884
	10.9833	0.0058
	11	0.00637
	11.0167	0.00689
	11.0333	0.00814
	11.05	0.00882
	11.0667	0.00517
	11.0833	0.00604
	11.1	0.00931
	11.1167	0.01225
	11.1333	0.01298
	11.15	0.00737
	11.1667	0.00967
	11.1833	0.00682
	11.2	0.00768
	11.2167	0.01104
	11.2333	0.01021
	11.25	0.01205
	11.2667	0.01219
	11.2833	0.00987
	11.3	0.00895
	11.3167	0.00924
	11.3333	0.00823
	11.35	0.00685
	11.3667	0.00833
	11.3833	0.00923
	11.4	0.01158
	11.4167	0.0105
	11.4333	0.0084
	11.45	0.01022
	11.4667	0.01178
	11.4833	0.01653
	11.5	0.01443
	11.5167	0.01353
	11.5333	0.01271
	11.55	0.01199
	11.5667	0.01063
	11.5833	0.00851
	11.6	0.0077
	11.6167	0.00756
	11.6333	0.00831
	11.65	0.00783
	11.6667	0.00727
	11.6833	0.00914
	11.7	0.01085
	11.7167	0.01096
	11.7333	0.00797
	11.75	0.00881
	11.7667	0.0065
	11.7833	0.00644
	11.8	0.01141
	11.8167	0.01123
	11.8333	0.01089
	11.85	0.0114
	11.8667	0.01054
	11.8833	0.00795
	11.9	0.00774
	11.9167	0.00819
	11.9333	0.00709
	11.95	0.00607
	11.9667	0.00592
	11.9833	0.00678
	12	0.00715
	12.0167	0.00692
	12.0333	0.00622
	12.05	0.00847
	12.0667	0.01023
	12.0833	0.00721
	12.1	0.00603
	12.1167	0.00825
	12.1333	0.00731
	12.15	0.0064
	12.1667	0.00472
	12.1833	0.00702
	12.2	0.00986
	12.2167	0.00925
	12.2333	0.00953
	12.25	0.00766
	12.2667	0.00636
	12.2833	0.00589
	12.3	0.00458
	12.3167	0.0038
	12.3333	0.00232
	12.35	-0.000421703
	12.3667	0.00353
	12.3833	0.00819
	12.4	0.0061
	12.4167	0.00657
	12.4333	0.00897
	12.45	0.01002
	12.4667	0.00906
	12.4833	0.00976
	12.5	0.01116
	12.5167	0.00673
	12.5333	0.00294
	12.55	0.00446
	12.5667	0.00431
	12.5833	0.00398
	12.6	0.00537
	12.6167	0.00683
	12.6333	0.0038
	12.65	0.00254
	12.6667	0.00233
	12.6833	1.04308e-05
	12.7	0.00163
	12.7167	0.00423
	12.7333	0.00467
	12.75	0.00401
	12.7667	-3.57628e-05
	12.7833	0.0024
	12.8	0.00746
	12.8167	0.00639
	12.8333	0.00919
	12.85	0.00931
	12.8667	0.00747
	12.8833	0.00715
	12.9	0.00494
	12.9167	0.00617
	12.9333	0.00631
	12.95	0.00596
	12.9667	0.00422
	12.9833	0.00425
	13	0.00755
	13.0167	0.00603
	13.0333	0.00556
	13.05	0.00894
	13.0667	0.00722
	13.0833	0.00542
	13.1	0.00422
	13.1167	0.00269
	13.1333	0.00127
	13.15	0.0044
	13.1667	0.00566
	13.1833	0.00917
	13.2	0.00407
	13.2167	0.00259
	13.2333	0.003
	13.25	0.0038
	13.2667	0.0041
	13.2833	0.0053
	13.3	0.00582
	13.3167	0.00518
	13.3333	0.00478
	13.35	0.00411
	13.3667	0.00739
	13.3833	0.00727
	13.4	0.00422
	13.4167	0.00455
	13.4333	0.00738
	13.45	0.00619
	13.4667	0.00851
	13.4833	0.00779
	13.5	0.00907
	13.5167	0.0084
	13.5333	0.00628
	13.55	0.00523
	13.5667	0.00724
	13.5833	0.00637
	13.6	0.00631
	13.6167	0.00707
	13.6333	0.00543
	13.65	0.00427
	13.6667	0.00267
	13.6833	0.00363
	13.7	0.00773
	13.7167	0.00749
	13.7333	0.00876
	13.75	0.00657
	13.7667	0.00897
	13.7833	0.00506
	13.8	0.0043
	13.8167	0.00214
	13.8333	0.00325
	13.85	0.00561
	13.8667	0.00558
	13.8833	0.0062
	13.9	0.00544
	13.9167	0.00359
	13.9333	0.00587
	13.95	0.00329
	13.9667	0.00483
	13.9833	0.0033
	14	0.0037
	14.0167	0.00124
	14.0333	0.00211
	14.05	0.00271
	14.0667	0.00403
	14.0833	0.00434
	14.1	0.00482
	14.1167	0.00567
	14.1333	0.00624
	14.15	0.0042
	14.1667	0.00484
	14.1833	0.00622
	14.2	0.00429
	14.2167	0.00458
	14.2333	0.00666
	14.25	0.00763
	14.2667	0.00479
	14.2833	0.00217
	14.3	0.00695
	14.3167	0.00308
	14.3333	0.00167
	14.35	0.00202
	14.3667	3.12924e-05
	14.3833	0.000932813
	14.4	0.000235438
	14.4167	0.00347
	14.4333	0.00265
	14.45	0.00501
	14.4667	0.00713
	14.4833	0.00822
	14.5	0.00738
	14.5167	0.00665
	14.5333	0.00733
	14.55	0.00627
	14.5667	0.00613
	14.5833	0.0058
	14.6	0.00542
	14.6167	-0.000531971
	14.6333	0.00279
	14.65	0.00416
	14.6667	0.00311
	14.6833	0.00298
	14.7	0.00405
	14.7167	0.00339
	14.7333	0.00333
	14.75	0.00548
	14.7667	0.00467
	14.7833	0.00138
	14.8	0.00487
	14.8167	0.00231
	14.8333	0.00264
	14.85	0.0037
	14.8667	0.0034
	14.8833	0.00341
	14.9	0.00352
	14.9167	0.00336
	14.9333	0.000971556
	14.95	-0.00221
	14.9667	0.00278
	14.9833	0.00278
	15	0.00116
	15.0167	0.000204146
	15.0333	0.00261
	15.05	0.00192
	15.0667	0.000858307
	15.0833	0.00293
	15.1	0.0013
	15.1167	0.000566244
	15.1333	-0.000417233
	15.15	-0.00152
	15.1667	-0.000321865
	15.1833	-0.000856817
	15.2	-0.00257
	15.2167	-0.00221
	15.2333	-0.00231
	15.25	-0.00181
	15.2667	-2.98023e-05
	15.2833	0.00051707
	15.3	0.000990927
	15.3167	0.00228
	15.3333	0.00232
	15.35	0.000192225
	15.3667	0.00561
	15.3833	0.00177
	15.4	-0.000724196
	15.4167	-0.000657141
	15.4333	0.00318
	15.45	0.00537
	15.4667	0.00449
	15.4833	0.00568
	15.5	0.00503
	15.5167	-0.000996888
	15.5333	-0.000473857
	15.55	0.00552
	15.5667	0.00422
	15.5833	0.00368
	15.6	0.00188
	15.6167	0.00307
	15.6333	0.00295
	15.65	0.00497
	15.6667	0.00405
	15.6833	0.0018
	15.7	-0.00121
	15.7167	-0.00354
	15.7333	-0.00327
	15.75	-0.00258
	15.7667	-0.00186
	15.7833	-0.00176
	15.8	-0.000430644
	15.8167	0.00132
	15.8333	0.00213
	15.85	0.00141
	15.8667	0.00243
	15.8833	0.000542402
	15.9	0.003
	15.9167	0.00485
	15.9333	0.00356
	15.95	0.00628
	15.9667	0.00863
	15.9833	0.01002
	16	0.01187
	16.0167	0.0166
	16.0333	0.01341
	16.05	0.01547
	16.0667	0.0136
	16.0833	0.01618
	16.1	0.01664
	16.1167	0.01564
	16.1333	0.01317
	16.15	0.01345
	16.1667	0.00897
	16.1833	0.00628
	16.2	0.00498
	16.2167	0.00529
	16.2333	0.00504
	16.25	0.00514
	16.2667	0.00215
	16.2833	0.00112
	16.3	0.000961125
	16.3167	-0.00194
	16.3333	0.00133
	16.35	-0.000528991
	16.3667	-0.00279
	16.3833	-0.00214
	16.4	-0.0011
	16.4167	-0.00395
	16.4333	-0.00229
	16.45	-0.00387
	16.4667	-0.00194
	16.4833	-0.000661612
	16.5	-0.00165
	16.5167	-0.00268
	16.5333	-0.0061
	16.55	-0.00342
	16.5667	-0.00409
	16.5833	-0.00398
	16.6	-0.00288
	16.6167	-0.00486
	16.6333	-0.00277
	16.65	-0.00297
	16.6667	-0.00362
	16.6833	-0.00403
	16.7	-0.0032
	16.7167	-0.00215
	16.7333	-0.000609457
	16.75	-0.000190735
	16.7667	-0.00137
	16.7833	-0.00446
	16.8	-0.00517
	16.8167	-0.00381
	16.8333	0.0013
	16.85	0.00308
	16.8667	0.0018
	16.8833	-0.00178
	16.9	-0.00139
	16.9167	-0.003
	16.9333	-0.000935793
	16.95	-0.00618
	16.9667	-0.00532
	16.9833	-0.00442
	17	-0.00312
	17.0167	-0.00402
	17.0333	-0.00318
	17.05	-0.00204
	17.0667	-0.00258
	17.0833	-0.00438
	17.1	-0.0048
	17.1167	-0.0085
	17.1333	-0.00791
	17.15	-0.00404
	17.1667	-0.00147
	17.1833	-0.000947714
	17.2	-0.00508
	17.2167	-0.00638
	17.2333	-0.00171
	17.25	-0.00369
	17.2667	-0.00476
	17.2833	-0.00419
	17.3	-0.00482
	17.3167	-0.00538
	17.3333	-0.00609
	17.35	-0.00657
	17.3667	-0.00611
	17.3833	-0.00699
	17.4	-0.00644
	17.4167	-0.00667
	17.4333	-0.00698
	17.45	0.000101328
	17.4667	-0.00114
	17.4833	-0.00311
	17.5	-0.00206
	17.5167	-0.000727177
	17.5333	-0.00403
	17.55	-0.01123
	17.5667	-0.01026
	17.5833	-0.00739
	17.6	-0.00759
	17.6167	-0.00514
	17.6333	-0.00418
	17.65	-0.00508
	17.6667	-0.00847
	17.6833	-0.00999
	17.7	-0.00848
	17.7167	-0.00343
	17.7333	-0.00577
	17.75	-0.00511
	17.7667	-0.00473
	17.7833	-0.00491
	17.8	-0.00905
	17.8167	-0.00933
	17.8333	-0.00873
	17.85	-0.00707
	17.8667	-0.00724
	17.8833	-0.00631
	17.9	-0.00719
	17.9167	-0.00647
	17.9333	-0.00305
	17.95	-0.00224
	17.9667	-0.000964105
	17.9833	-0.00247
	18	-0.00171
	18.0167	-0.00392
	18.0333	-0.00517
	18.05	-0.0055
	18.0667	-0.00655
	18.0833	-0.00633
	18.1	-0.00254
	18.1167	-0.0029
	18.1333	-0.00376
	18.15	-0.00872
	18.1667	-0.00713
	18.1833	-0.00796
	18.2	-0.00716
	18.2167	-0.00652
	18.2333	-0.00655
	18.25	-0.00544
	18.2667	-0.00528
	18.2833	-0.00437
	18.3	-0.00607
	18.3167	-0.00582
	18.3333	-0.00281
	18.35	-0.00296
	18.3667	-0.00611
	18.3833	-0.00572
	18.4	-0.00553
	18.4167	-0.00657
	18.4333	-0.007
	18.45	-0.00658
	18.4667	-0.00825
	18.4833	-0.00789
	18.5	-0.00892
	18.5167	-0.01161
	18.5333	-0.00835
	18.55	-0.00575
	18.5667	-0.00836
	18.5833	-0.00803
	18.6	-0.01009
	18.6167	-0.00823
	18.6333	-0.00644
	18.65	-0.0041
	18.6667	-0.00657
	18.6833	-0.00693
	18.7	-0.00838
	18.7167	-0.00934
	18.7333	-0.00671
	18.75	-0.00637
	18.7667	-0.00476
	18.7833	-0.00504
	18.8	-0.00704
	18.8167	-0.00596
	18.8333	-0.00296
	18.85	-0.00251
	18.8667	-0.00468
	18.8833	-0.00269
	18.9	-0.00222
	18.9167	-0.00417
	18.9333	-0.00611
	18.95	-0.00899
	18.9667	-0.01012
	18.9833	-0.00838
	19	-0.00742
	19.0167	-0.00927
	19.0333	-0.00862
	19.05	-0.01022
	19.0667	-0.0096
	19.0833	-0.01045
	19.1	-0.01404
	19.1167	-0.00864
	19.1333	-0.00831
	19.15	-0.00704
	19.1667	-0.00592
	19.1833	-0.00651
	19.2	-0.007
	19.2167	-0.00784
	19.2333	-0.00947
	19.25	-0.01037
	19.2667	-0.00567
	19.2833	-0.00219
	19.3	-0.00763
	19.3167	-0.00932
	19.3333	-0.00806
	19.35	-0.00661
	19.3667	-0.00878
	19.3833	-0.00796
	19.4	-0.00387
	19.4167	-0.00218
	19.4333	-0.0025
	19.45	-0.00354
	19.4667	-0.00508
	19.4833	-0.0073
	19.5	-0.00695
	19.5167	-0.00515
	19.5333	-0.00575
	19.55	-0.00814
	19.5667	-0.00834
	19.5833	-0.00701
	19.6	-0.00753
	19.6167	-0.00911
	19.6333	-0.01302
	19.65	-0.01267
	19.6667	-0.01173
	19.6833	-0.01043
	19.7	-0.01177
	19.7167	-0.0103
	19.7333	-0.01103
	19.75	-0.00945
	19.7667	-0.01148
	19.7833	-0.01199
	19.8	-0.00673
	19.8167	-0.00567
	19.8333	-0.00978
	19.85	-0.01104
	19.8667	-0.01249
	19.8833	-0.01375
	19.9	-0.01434
	19.9167	-0.01234
	19.9333	-0.01447
	19.95	-0.01704
	19.9667	-0.01364
	19.9833	-0.00971
	20	-0.01091
	20.0167	-0.01229
	20.0333	-0.01009
	20.05	-0.00865
	20.0667	-0.0093
	20.0833	-0.00998
	20.1	-0.01103
	20.1167	-0.01121
	20.1333	-0.0117
	20.15	-0.00973
	20.1667	-0.01026
	20.1833	-0.00718
	20.2	-0.00786
	20.2167	-0.01024
	20.2333	-0.01235
	20.25	-0.01533
	20.2667	-0.0137
	20.2833	-0.01335
	20.3	-0.01367
	20.3167	-0.0156
	20.3333	-0.01553
	20.35	-0.0116
	20.3667	-0.00716
	20.3833	-0.00994
	20.4	-0.01168
	20.4167	-0.01326
	20.4333	-0.01451
	20.45	-0.01341
	20.4667	-0.01302
	20.4833	-0.01284
	20.5	-0.01033
	20.5167	-0.0057
	20.5333	-0.01027
	20.55	-0.01268
	20.5667	-0.01321
	20.5833	-0.01375
	20.6	-0.01358
	20.6167	-0.01255
	20.6333	-0.01232
	20.65	-0.0122
	20.6667	-0.01225
	20.6833	-0.01501
	20.7	-0.02153
	20.7167	-0.01633
	20.7333	-0.0145
	20.75	-0.01244
	20.7667	-0.011
	20.7833	-0.01168
	20.8	-0.00992
	20.8167	-0.00874
	20.8333	-0.00928
	20.85	-0.00995
	20.8667	-0.01223
	20.8833	-0.01593
	20.9	-0.01815
	20.9167	-0.01475
	20.9333	-0.01319
	20.95	-0.01123
	20.9667	-0.01065
	20.9833	-0.00937
	21	-0.00918
	21.0167	-0.00996
	21.0333	-0.01214
	21.05	-0.01172
	21.0667	-0.01084
	21.0833	-0.00949
	21.1	-0.01018
	21.1167	-0.01027
	21.1333	-0.00877
	21.15	-0.01089
	21.1667	-0.01176
	21.1833	-0.00966
	21.2	-0.01082
	21.2167	-0.00954
	21.2333	-0.01096
	21.25	-0.0091
	21.2667	-0.00748
	21.2833	-0.00911
	21.3	-0.01034
	21.3167	-0.00812
	21.3333	-0.00715
	21.35	-0.00939
	21.3667	-0.00928
	21.3833	-0.01085
	21.4	-0.01138
	21.4167	-0.01136
	21.4333	-0.01201
	21.45	-0.011
	21.4667	-0.01066
	21.4833	-0.01185
	21.5	-0.0119
	21.5167	-0.01179
	21.5333	-0.01153
	21.55	-0.00909
	21.5667	-0.00862
	21.5833	-0.00761
	21.6	-0.00824
	21.6167	-0.01071
	21.6333	-0.00769
	21.65	-0.00786
	21.6667	-0.00885
	21.6833	-0.00892
	21.7	-0.01026
	21.7167	-0.011
	21.7333	-0.00972
	21.75	-0.01195
	21.7667	-0.01324
	21.7833	-0.01184
	21.8	-0.01198
	21.8167	-0.01098
	21.8333	-0.01011
	21.85	-0.01067
	21.8667	-0.0085
	21.8833	-0.0062
	21.9	-0.00747
	21.9167	-0.00627
	21.9333	-0.00741
	21.95	-0.00711
	21.9667	-0.00803
	21.9833	-0.00791
	22	-0.00734
	22.0167	-0.00638
	22.0333	-0.00698
	22.05	-0.00903
	22.0667	-0.01
	22.0833	-0.01262
	22.1	-0.01027
	22.1167	-0.00916
	22.1333	-0.0109
	22.15	-0.00997
	22.1667	-0.01105
	22.1833	-0.01089
	22.2	-0.01056
	22.2167	-0.00841
	22.2333	-0.00839
	22.25	-0.00875
	22.2667	-0.01009
	22.2833	-0.00966
	22.3	-0.01087
	22.3167	-0.01078
	22.3333	-0.01227
	22.35	-0.01109
	22.3667	-0.01169
	22.3833	-0.01301
	22.4	-0.01121
	22.4167	-0.01119
	22.4333	-0.00838
	22.45	-0.01017
	22.4667	-0.0098
	22.4833	-0.01045
	22.5	-0.01223
	22.5167	-0.01231
	22.5333	-0.01031
	22.55	-0.01193
	22.5667	-0.01126
	22.5833	-0.01093
	22.6	-0.01058
	22.6167	-0.00732
	22.6333	-0.00942
	22.65	-0.01009
	22.6667	-0.01117
	22.6833	-0.01237
	22.7	-0.01157
	22.7167	-0.01151
	22.7333	-0.00995
	22.75	-0.00852
	22.7667	-0.00749
	22.7833	-0.01021
	22.8	-0.00779
	22.8167	-0.00744
	22.8333	-0.00783
	22.85	-0.00907
	22.8667	-0.00916
	22.8833	-0.00668
	22.9	-0.00834
	22.9167	-0.01043
	22.9333	-0.00862
	22.95	-0.00643
	22.9667	-0.0091
	22.9833	-0.00582
	23	-0.00558
	23.0167	-0.00866
	23.0333	-0.01076
	23.05	-0.00675
	23.0667	-0.00498
	23.0833	-0.00817
	23.1	-0.00751
	23.1167	-0.0091
	23.1333	-0.00768
	23.15	-0.00767
	23.1667	-0.00742
	23.1833	-0.00758
	23.2	-0.01187
	23.2167	-0.01493
	23.2333	-0.01198
	23.25	-0.01056
	23.2667	-0.01188
	23.2833	-0.0109
	23.3	-0.00921
	23.3167	-0.00993
	23.3333	-0.00776
	23.35	-0.00881
	23.3667	-0.01049
	23.3833	-0.00996
	23.4	-0.01116
	23.4167	-0.01104
	23.4333	-0.01319
	23.45	-0.01383
	23.4667	-0.011
	23.4833	-0.01129
	23.5	-0.01328
	23.5167	-0.01303
	23.5333	-0.0125
	23.55	-0.01451
	23.5667	-0.01663
	23.5833	-0.01565
	23.6	-0.01329
	23.6167	-0.01493
	23.6333	-0.01574
	23.65	-0.01405
	23.6667	-0.01395
	23.6833	-0.01666
	23.7	-0.01456
	23.7167	-0.01195
	23.7333	-0.01274
	23.75	-0.01406
	23.7667	-0.01179
	23.7833	-0.01217
	23.8	-0.01247
	23.8167	-0.01159
	23.8333	-0.01304
	23.85	-0.01321
	23.8667	-0.01292
	23.8833	-0.01435
	23.9	-0.01362
	23.9167	-0.0136
	23.9333	-0.01485
	23.95	-0.01447
	23.9667	-0.0122
	23.9833	-0.01266
	24	-0.01439
	24.0167	-0.01222
	24.0333	-0.01325
	24.05	-0.01455
	24.0667	-0.01346
	24.0833	-0.00949
	24.1	-0.01119
	24.1167	-0.01293
	24.1333	-0.01173
	24.15	-0.01225
	24.1667	-0.01113
	24.1833	-0.01179
	24.2	-0.0134
	24.2167	-0.01392
	24.2333	-0.01351
	24.25	-0.01268
	24.2667	-0.01362
	24.2833	-0.01124
	24.3	-0.01043
	24.3167	-0.00991
	24.3333	-0.01204
	24.35	-0.01209
	24.3667	-0.01296
	24.3833	-0.01362
	24.4	-0.01349
	24.4167	-0.01127
	24.4333	-0.00967
	24.45	-0.01271
	24.4667	-0.01149
	24.4833	-0.01285
	24.5	-0.01436
	24.5167	-0.01269
	24.5333	-0.01504
	24.55	-0.01338
	24.5667	-0.0109
	24.5833	-0.01118
	24.6	-0.0122
	24.6167	-0.01166
	24.6333	-0.01354
	24.65	-0.01132
	24.6667	-0.01072
	24.6833	-0.01224
	24.7	-0.01379
	24.7167	-0.01281
	24.7333	-0.01222
	24.75	-0.01189
	24.7667	-0.0125
	24.7833	-0.00865
	24.8	-0.01007
	24.8167	-0.01136
	24.8333	-0.0147
	24.85	-0.01401
	24.8667	-0.01318
	24.8833	-0.01308
	24.9	-0.01289
	24.9167	-0.01068
	24.9333	-0.01331
	24.95	-0.01243
	24.9667	-0.01066
	24.9833	-0.01306
	25	-0.01061
	25.0167	-0.01111
	25.0333	-0.01041
	25.05	-0.00961
	25.0667	-0.01276
	25.0833	-0.01174
	25.1	-0.00941
	25.1167	-0.00943
	25.1333	-0.01411
	25.15	-0.01591
	25.1667	-0.01154
	25.1833	-0.01323
	25.2	-0.01152
	25.2167	-0.00907
	25.2333	-0.01307
	25.25	-0.01364
	25.2667	-0.0133
	25.2833	-0.0108
	25.3	-0.00934
	25.3167	-0.00936
	25.3333	-0.01026
	25.35	-0.00929
	25.3667	-0.00962
	25.3833	-0.01184
	25.4	-0.01385
	25.4167	-0.01425
	25.4333	-0.01114
	25.45	-0.01023
	25.4667	-0.0123
	25.4833	-0.01136
	25.5	-0.01407
	25.5167	-0.01526
	25.5333	-0.00926
	25.55	-0.00975
	25.5667	-0.00904
	25.5833	-0.01044
	25.6	-0.01114
	25.6167	-0.01031
	25.6333	-0.01053
	25.65	-0.01342
	25.6667	-0.01339
	25.6833	-0.01155
	25.7	-0.00847
	25.7167	-0.00963
	25.7333	-0.00938
	25.75	-0.01001
	25.7667	-0.00843
	25.7833	-0.00729
	25.8	-0.00908
	25.8167	-0.00831
	25.8333	-0.00894
	25.85	-0.00984
	25.8667	-0.00818
	25.8833	-0.00864
	25.9	-0.00923
	25.9167	-0.0079
	25.9333	-0.00578
	25.95	-0.00713
	25.9667	-0.00692
	25.9833	-0.00775
	26	-0.0094
	26.0167	-0.00943
	26.0333	-0.0112
	26.05	-0.01471
	26.0667	-0.01284
	26.0833	-0.01091
	26.1	-0.0084
	26.1167	-0.0094
	26.1333	-0.00841
	26.15	-0.009
	26.1667	-0.00832
	26.1833	-0.00998
	26.2	-0.00985
	26.2167	-0.01128
	26.2333	-0.01243
	26.25	-0.01379
	26.2667	-0.01116
	26.2833	-0.01117
	26.3	-0.01047
	26.3167	-0.00971
	26.3333	-0.01075
	26.35	-0.01228
	26.3667	-0.01337
	26.3833	-0.01362
	26.4	-0.01082
	26.4167	-0.00988
	26.4333	-0.0084
	26.45	-0.00546
	26.4667	-0.00612
	26.4833	-0.01006
	26.5	-0.01291
	26.5167	-0.01355
	26.5333	-0.01347
	26.55	-0.01247
	26.5667	-0.00993
	26.5833	-0.0128
	26.6	-0.013
	26.6167	-0.01386
	26.6333	-0.01337
	26.65	-0.01195
	26.6667	-0.01235
	26.6833	-0.01255
	26.7	-0.01236
	26.7167	-0.01196
	26.7333	-0.01557
	26.75	-0.0134
	26.7667	-0.01599
	26.7833	-0.01661
	26.8	-0.01477
	26.8167	-0.01584
	26.8333	-0.01547
	26.85	-0.01568
	26.8667	-0.01373
	26.8833	-0.01441
	26.9	-0.0135
	26.9167	-0.0117
	26.9333	-0.01355
	26.95	-0.01514
	26.9667	-0.01269
	26.9833	-0.0141
	27	-0.01634
	27.0167	-0.01155
	27.0333	-0.01124
	27.05	-0.01401
	27.0667	-0.01138
	27.0833	-0.01051
	27.1	-0.00952
	27.1167	-0.0129
	27.1333	-0.00973
	27.15	-0.00874
	27.1667	-0.01084
	27.1833	-0.01172
	27.2	-0.01106
	27.2167	-0.01227
	27.2333	-0.01298
	27.25	-0.01244
	27.2667	-0.00917
	27.2833	-0.01152
	27.3	-0.01197
	27.3167	-0.00963
	27.3333	-0.01216
	27.35	-0.01238
	27.3667	-0.01393
	27.3833	-0.0124
	27.4	-0.01027
	27.4167	-0.01318
	27.4333	-0.01355
	27.45	-0.01335
	27.4667	-0.01507
	27.4833	-0.0147
	27.5	-0.01356
	27.5167	-0.01437
	27.5333	-0.01536
	27.55	-0.01349
	27.5667	-0.01264
	27.5833	-0.01094
	27.6	-0.01219
	27.6167	-0.01266
	27.6333	-0.01396
	27.65	-0.01486
	27.6667	-0.01674
	27.6833	-0.01661
	27.7	-0.01376
	27.7167	-0.01258
	27.7333	-0.01146
	27.75	-0.01103
	27.7667	-0.015
	27.7833	-0.01595
	27.8	-0.01668
	27.8167	-0.01646
	27.8333	-0.01558
	27.85	-0.01506
	27.8667	-0.01505
	27.8833	-0.01458
	27.9	-0.0127
	27.9167	-0.01093
	27.9333	-0.01143
	27.95	-0.01541
	27.9667	-0.01593
	27.9833	-0.01514
	28	-0.01498
	28.0167	-0.01354
	28.0333	-0.01701
	28.05	-0.01725
	28.0667	-0.01435
	28.0833	-0.01519
	28.1	-0.01495
	28.1167	-0.01326
	28.1333	-0.01317
	28.15	-0.01212
	28.1667	-0.01085
	28.1833	-0.01647
	28.2	-0.01613
	28.2167	-0.01271
	28.2333	-0.0153
	28.25	-0.01767
	28.2667	-0.01601
	28.2833	-0.01439
	28.3	-0.01521
	28.3167	-0.01586
	28.3333	-0.0147
	28.35	-0.01376
	28.3667	-0.01511
	28.3833	-0.01529
	28.4	-0.01808
	28.4167	-0.01487
	28.4333	-0.0146
	28.45	-0.01353
	28.4667	-0.01363
	28.4833	-0.01427
	28.5	-0.01872
	28.5167	-0.01534
	28.5333	-0.01587
	28.55	-0.0137
	28.5667	-0.01493
	28.5833	-0.01632
	28.6	-0.01606
	28.6167	-0.01676
	28.6333	-0.01438
	28.65	-0.01436
	28.6667	-0.01499
	28.6833	-0.01526
	28.7	-0.01272
	28.7167	-0.0153
	28.7333	-0.01639
	28.75	-0.01248
	28.7667	-0.01691
	28.7833	-0.01821
	28.8	-0.01706
	28.8167	-0.01627
	28.8333	-0.01787
	28.85	-0.01957
	28.8667	-0.02066
	28.8833	-0.01765
	28.9	-0.01823
	28.9167	-0.01804
	28.9333	-0.01589
	28.95	-0.01766
	28.9667	-0.01764
	28.9833	-0.0175
	29	-0.01961
	29.0167	-0.02064
	29.0333	-0.01791
	29.05	-0.01826
	29.0667	-0.01578
	29.0833	-0.01699
	29.1	-0.01764
	29.1167	-0.01815
	29.1333	-0.01716
	29.15	-0.01573
	29.1667	-0.01503
	29.1833	-0.01383
	29.2	-0.01744
	29.2167	-0.01835
	29.2333	-0.01576
	29.25	-0.0142
	29.2667	-0.01754
	29.2833	-0.01775
	29.3	-0.01707
	29.3167	-0.01509
	29.3333	-0.01505
	29.35	-0.01561
	29.3667	-0.0147
	29.3833	-0.01672
	29.4	-0.01847
	29.4167	-0.01871
	29.4333	-0.01639
	29.45	-0.01622
	29.4667	-0.01676
	29.4833	-0.01742
	29.5	-0.01384
	29.5167	-0.01357
	29.5333	-0.01189
	29.55	-0.01275
	29.5667	-0.01646
	29.5833	-0.01927
	29.6	-0.01764
	29.6167	-0.0176
	29.6333	-0.01851
	29.65	-0.01789
	29.6667	-0.01364
	29.6833	-0.01217
	29.7	-0.01314
	29.7167	-0.01647
	29.7333	-0.01426
	29.75	-0.01633
	29.7667	-0.0172
	29.7833	-0.01822
	29.8	-0.02212
	29.8167	-0.02112
	29.8333	-0.01668
	29.85	-0.01691
	29.8667	-0.0175
	29.8833	-0.01695
	29.9	-0.01433
	29.9167	-0.01629
	29.9333	-0.014
	29.95	-0.01647
	29.9667	-0.01381
	29.9833	-0.01373
	30	-0.01599
	0	0
	0	0
	0	0
	0	0
	0	0
	0	0
	0	0
	0	0
	0	0
	0	0
	0	0
	0	0
	0	0
	0	0
	0	0
	0	0
	0	0
	0	0
	0	0
	0	0
	0	0
	0	0
	0	0
	0	0
	0	0
	0	0
	0	0
	0	0
	0	0
